# Supplementary material for: Composition design and optimization of Fe–C–Mn–Al steel based on machine learning
Source: Royal Society of Chemistry journal article supplement (doi:10.1039/d3cp05453e), 2024-01-01
Supplement: d3cp05453e1.xlsx [file d3cp05453e1.xlsx]

## Sheet: Sheet1
Fe	Mn	C	Al	Si	Cr	Ti	Ni	Mo	Cu	Nb	Zr	B	V	P	S	N	HRST	HRRR	HRS	HRCT	HRCM	PCRAT	PCRAt	PCRAM	CRRR	CRS	AT	At	ACM	AAT	Aat	AACM	TT	Tt	TCM	GL	GW	GH	SR	UTS	TEL
85.47	8.03	0.4	6.1	0	0	0	0	0	0	0	0	0	0	0	0	0	1100	92.5	4.5	1	air	25	0	air			800	30	air	25	0	air	25	0	air	50	12.5	4.5	0.001	759	58.2
85.47	8.03	0.4	6.1	0	0	0	0	0	0	0	0	0	0	0	0	0	1100	92.5	4.5	1	air	25	0	air			800	30	air	25	0	air	25	0	air	50	12.5	4.5	0.1	770	36.8
85.47	8.03	0.4	6.1	0	0	0	0	0	0	0	0	0	0	0	0	0	1100	92.5	4.5	1	air	25	0	air			900	30	air	25	0	air	25	0	air	50	12.5	4.5	0.001	741.3	40
85.47	8.03	0.4	6.1	0	0	0	0	0	0	0	0	0	0	0	0	0	1100	92.5	4.5	1	air	25	0	air			900	30	air	25	0	air	25	0	air	50	12.5	4.5	0.1	760.4	46.6
85.47	8.03	0.4	6.1	0	0	0	0	0	0	0	0	0	0	0	0	0	1100	92.5	4.5	1	air	25	0	air			1000	30	air	25	0	air	25	0	air	50	12.5	4.5	0.001	782	28.3
85.47	8.03	0.4	6.1	0	0	0	0	0	0	0	0	0	0	0	0	0	1100	92.5	4.5	1	air	25	0	air			1000	30	air	25	0	air	25	0	air	50	12.5	4.5	0.1	877	37.9
87.73	6.78	0.18	3.92	1.34	0	0	0	0	0	0	0	0	0	0.04	0.01	0	1080	80	1	1	air	25	0	air			750	60	air	25	0	air	25	0	air	25	6	1	0.000133	802	61
87.73	6.78	0.18	3.92	1.34	0	0	0	0	0	0	0	0	0	0.04	0.01	0	1080	80	1	1	air	25	0	air			750	60	air	25	0	air	25	0	air	25	6	1	0.000665	747	39
87.73	6.78	0.18	3.92	1.34	0	0	0	0	0	0	0	0	0	0.04	0.01	0	1080	80	1	1	air	25	0	air			750	60	air	25	0	air	25	0	air	25	6	1	0.00133	720	29
81.06	11.42	0.64	6.88	0	0	0	0	0	0	0	0	0	0	0	0	0	1200	88.5	4	1	air	1000	60	water	75	1	700	10	water	25	0	air	25	0	air	25	6	1	0.001	1286.7	17.2
81.06	11.42	0.64	6.88	0	0	0	0	0	0	0	0	0	0	0	0	0	1200	88.5	4	1	air	1000	60	water	75	1	750	10	water	25	0	air	25	0	air	25	6	1	0.001	1151.5	25.2
81.06	11.42	0.64	6.88	0	0	0	0	0	0	0	0	0	0	0	0	0	1200	88.5	4	1	air	1000	60	water	75	1	800	10	water	25	0	air	25	0	air	25	6	1	0.001	968.4	35.2
81.06	11.42	0.64	6.88	0	0	0	0	0	0	0	0	0	0	0	0	0	1200	88.5	4	1	air	1000	60	water	75	1	850	10	water	25	0	air	25	0	air	25	6	1	0.001	940.8	44.1
77.84	11.36	0.92	9.88	0	0	0	0	0	0	0	0	0	0	0	0	0	1200	88.5	4	1	air	1000	60	water	75	1	1000	10	water	25	0	air	25	0	air	25	6	1	0.001	1089.5	35.8
77.87	11	1.25	9.88	0	0	0	0	0	0	0	0	0	0	0	0	0	1200	88.5	4	1	air	1000	60	water	75	1	900	10	water	25	0	air	25	0	air	25	6	1	0.001	1275.8	5.1
77.87	11	1.25	9.88	0	0	0	0	0	0	0	0	0	0	0	0	0	1200	88.5	4	1	air	1000	60	water	75	1	950	10	water	25	0	air	25	0	air	25	6	1	0.001	1287	13.1
77.87	11	1.25	9.88	0	0	0	0	0	0	0	0	0	0	0	0	0	1200	88.5	4	1	air	1000	60	water	75	1	1000	10	water	25	0	air	25	0	air	25	6	1	0.001	1314.3	22.2
75.9	22	0.6	1.5	0	0	0	0	0	0	0	0	0	0	0	0	0	1000	80	2	1	air	25	0	air	50	1	750	10	water	25	0	air	25	0	air	50	12.5	1	0.0001	1113	45
85.129	7.23	0.09	4.42	1.99	0.33	0	0	0.2	0.5	0.11	0	0.001	0	0	0	0	1200	90	4	1	water	750	300	air	62.5	1.5	750	20	water	25	0	air	25	0	air	25	6	1.5	0.00066	896	34.72
85.2823	10	0.4	4	0.3	0	0	0	0	0	0	0	0	0	0.0093	0.0084	0	1100	90	4	1	air	700	60	air	40	2.4	750	30	air	25	0	air	25	0	air	15	5	1	0.0005	916.9	32.5
85.2823	10	0.4	4	0.3	0	0	0	0	0	0	0	0	0	0.0093	0.0084	0	1100	90	4	1	air	700	60	air	60	1.6	750	30	air	25	0	air	25	0	air	15	5	1	0.0005	986.1	40.8
85.2823	10	0.4	4	0.3	0	0	0	0	0	0	0	0	0	0.0093	0.0084	0	1100	90	4	1	air	700	60	air	70	1.2	750	30	air	25	0	air	25	0	air	15	5	1	0.0005	958	27.9
95.875	1.47	0.25	0	1.6	0.51	0	0	0.27	0	0	0	0	0	0.01	0.005	0.01	900	70	12	1	air	25	0	air			25	0	air	900	10	water	500	60	air	35	7	3	0.00048	1640	7.6
95.875	1.47	0.25	0	1.6	0.51	0	0	0.27	0	0	0	0	0	0.01	0.005	0.01	900	70	12	1	air	25	0	air			25	0	air	900	10	water	400	60	air	35	7	3	0.00048	1570	8.1
95.875	1.47	0.25	0	1.6	0.51	0	0	0.27	0	0	0	0	0	0.01	0.005	0.01	900	70	12	1	air	25	0	air			25	0	air	900	10	water	280	60	air	35	7	3	0.00048	1430	8.4
95.875	1.47	0.25	0	1.6	0.51	0	0	0.27	0	0	0	0	0	0.01	0.005	0.01	900	70	12	1	air	25	0	air			25	0	air	900	10	water	200	60	air	35	7	3	0.00048	1180	9.4
95.875	1.47	0.25	0	1.6	0.51	0	0	0.27	0	0	0	0	0	0.01	0.005	0.01	900	70	12	1	air	25	0	air			25	0	air	900	10	water	25	0	air	35	7	3	0.00048	1740	8.8
93	6.8	0.2	0	0	0	0	0	0	0	0	0	0	0	0	0	0	1200	89	3.3	1	air	25	0	air			25	0	air	25	0	air	25	0	air	15	5	3.3	0.001	1695	12.4
91.2	6.7	0.2	0	1.9	0	0	0	0	0	0	0	0	0	0	0	0	1200	89	3.3	1	air	25	0	air			25	0	air	25	0	air	25	0	air	15	5	3.3	0.001	1953	12.8
88.9	6.8	0.2	0	4.1	0	0	0	0	0	0	0	0	0	0	0	0	1200	89	3.3	1	air	25	0	air			25	0	air	25	0	air	25	0	air	15	5	3.3	0.001	2163	11.7
88.25	7.2	0.25	1.5	0.8	2	0	0	0	0	0	0	0	0	0	0	0	1150	92.5	3	1	air	25	0	air			25	0	air	820	5	air	170	20	air	31	6	3	0.001	1780	17.7
80.83	11.88	1.12	6.17	0	0	0	0	0	0	0	0	0	0	0	0	0	1180		4	1	water	25	0	air	75	1	700	15	water	25	0	air	25	0	air	25	6	1	0.001	1065	24.28
80.83	11.88	1.12	6.17	0	0	0	0	0	0	0	0	0	0	0	0	0	1180		4	1	water	25	0	air	75	1	750	15	water	25	0	air	25	0	air	25	6	1	0.001	990	36.6
80.83	11.88	1.12	6.17	0	0	0	0	0	0	0	0	0	0	0	0	0	1180		4	1	water	25	0	air	75	1	800	15	water	25	0	air	25	0	air	25	6	1	0.001	940	39.4
80.83	11.88	1.12	6.17	0	0	0	0	0	0	0	0	0	0	0	0	0	1180		4	1	water	25	0	air	75	1	850	15	water	25	0	air	25	0	air	25	6	1	0.001	884	35.9
80.83	11.88	1.12	6.17	0	0	0	0	0	0	0	0	0	0	0	0	0	1180		4	1	water	25	0	air	75	1	900	15	water	25	0	air	25	0	air	25	6	1	0.001	827	34.6
78.73	12.03	1.03	8.21	0	0	0	0	0	0	0	0	0	0	0	0	0	1180		4	1	water	25	0	air	75	1	700	15	water	25	0	air	25	0	air	25	6	1	0.001	1311	14.2
78.73	12.03	1.03	8.21	0	0	0	0	0	0	0	0	0	0	0	0	0	1180		4	1	water	25	0	air	75	1	750	15	water	25	0	air	25	0	air	25	6	1	0.001	1205	19.4
78.73	12.03	1.03	8.21	0	0	0	0	0	0	0	0	0	0	0	0	0	1180		4	1	water	25	0	air	75	1	800	15	water	25	0	air	25	0	air	25	6	1	0.001	1056	35.5
78.73	12.03	1.03	8.21	0	0	0	0	0	0	0	0	0	0	0	0	0	1180		4	1	water	25	0	air	75	1	850	15	water	25	0	air	25	0	air	25	6	1	0.001	983	44.9
78.73	12.03	1.03	8.21	0	0	0	0	0	0	0	0	0	0	0	0	0	1180		4	1	water	25	0	air	75	1	900	15	water	25	0	air	25	0	air	25	6	1	0.001	931	37.26
88.2831	6.74	0.38	2.91	1.27	0	0	0	0	0	0.034	0	0.0029	0.38	0	0	0	1150	91.8	4.9	1	air	25	0	air			800	30	air	25	0	air	150	120	air	25	6	4.9	0.00067	2112	16
85.47	8.03	0.4	6.1	0	0	0	0	0	0	0	0	0	0	0	0	0	1100	92.5	4.5	1	air	25	0	air			25	0	air	25	0	air	25	0	air	40	12.5	4.5	0.001	756	56
93.972	3.14	0.38	0.43	1.64	0.24	0	0	0.15	0	0.048	0	0	0	0	0	0	1150		6	2	air	660	60	air			725	30	water	25	0	air	25	0	air	25	6	3	0.001	1369	19.5
93.972	3.14	0.38	0.43	1.64	0.24	0	0	0.15	0	0.048	0	0	0	0	0	0	1150		6	2	air	660	60	air			725	30	air	25	0	air	25	0	air	25	6	3	0.001	1338	18.3
93.972	3.14	0.38	0.43	1.64	0.24	0	0	0.15	0	0.048	0	0	0	0	0	0	1150		6	2	air	660	60	air			725	30	water	25	0	air	300	30	water	25	6	3	0.001	1235	25.2
93.972	3.14	0.38	0.43	1.64	0.24	0	0	0.15	0	0.048	0	0	0	0	0	0	1150		6	2	air	660	60	air			725	30	water	25	0	air	300	30	air	25	6	3	0.001	1339	22.3
84.437	12.14	0.29	2.96	0	0	0	0	0	0	0.063	0	0	0.11	0	0	0	1130	94.2	4	1	air	25	0	air	75	1	700	60	air	25	0	air	25	0	air	25	6	1	0.002	1034.2	36.9
82	5	1	11	0	0	0	0	0	0	1	0	0	0	0	0	0	1100	92.5	3	1	air	25	0	air			25	0	air	25	0	air	25	0	air	12.7	3	2	0.001	1080	8.8
82	5	1	11	0	0	0	0	0	0	1	0	0	0	0	0	0	1100	92.5	3	1	air	1000	60	furnace			25	0	air	25	0	air	25	0	air	12.7	3	2	0.001	900	12
82	5	1	11	0	0	0	0	0	0	1	0	0	0	0	0	0	1100	92.5	3	1	air	25	0	air	33	2	1000	60	furnace	25	0	air	25	0	air	12.7	3	2	0.001	991	14.6
77	10	1	11	0	0	0	0	0	0	1	0	0	0	0	0	0	1100	92.5	3	1	air	25	0	air			25	0	air	25	0	air	25	0	air	12.7	3	2	0.001	1213	9.5
77	10	1	11	0	0	0	0	0	0	1	0	0	0	0	0	0	1100	92.5	3	1	air	1000	60	furnace			25	0	air	25	0	air	25	0	air	12.7	3	2	0.001	1018	13.3
77	10	1	11	0	0	0	0	0	0	1	0	0	0	0	0	0	1100	92.5	3	1	air	25	0	air	33	2	1000	60	furnace	25	0	air	25	0	air	12.7	3	2	0.001	1115	15.5
93.3	5	0.2	1.5	0	0	0	0	0	0	0	0	0	0	0	0	0	1050		3	1	air	25	0	air			680	20	air	25	0	air	25	0	air	25	6	3	0.0016	843	30.4
90.58	6.12	0.22	3.08	0	0	0	0	0	0	0	0	0	0	0	0	0	1150	85	4.5	1	air	25	0	air			740	10	air	25	0	air	25	0	air	25	5	1.2	0.0001	992	47.6
64	27	1	8	0	0	0	0	0	0	0	0	0	0	0	0	0	1050	85	3	1	water	25	0	air	60	1.2	900	3	water	25	0	air	25	0	air	20	4	1.2	0.0005	1086	52
63.5	27	1	8	0	0	0	0	0	0	0	0	0	0.5	0	0	0	1050	85	3	1	water	25	0	air	60	1.2	900	3	water	25	0	air	25	0	air	20	4	1.2	0.0005	1133	45
87.73	6.78	0.18	3.92	1.34	0	0	0	0	0	0	0	0	0	0.04	0.01	0	1100	80	6	1	air	25	0	air			700	60	furnace	25	0	air	25	0	air	25	6	6	0.0013	757	34
87.73	6.78	0.18	3.92	1.34	0	0	0	0	0	0	0	0	0	0.04	0.01	0	1100	80	6	1	air	25	0	air			750	60	furnace	25	0	air	25	0	air	25	6	6	0.0013	802	61
87.73	6.78	0.18	3.92	1.34	0	0	0	0	0	0	0	0	0	0.04	0.01	0	1100	80	6	1	air	25	0	air			800	60	furnace	25	0	air	25	0	air	25	6	6	0.0013	771	43
91.409	5.95	0.055	1.03	1.55	0	0	0	0	0	0	0	0	0	0.005	0.001	0	1200	95.8	2.5	1	air	600	60	furnace	10	2.25	700	3	air	25	0	air	25	0	air	25	6	2.25	0.002	909	25.5
91.409	5.95	0.055	1.03	1.55	0	0	0	0	0	0	0	0	0	0.005	0.001	0	1200	95.8	2.5	1	air	600	60	furnace	70	0.75	700	3	air	25	0	air	25	0	air	25	6	0.75	0.002	1002	25.3
92.6	7	0.2	0	0.2	0	0	0	0	0	0	0	0	0	0	0	0	1200	88	3.5	1	air	25	0	air			645	60	air	25	0	air	25	0	air	12	3.5	1.1	0.001	1146	35
92.6	7	0.2	0	0.2	0	0	0	0	0	0	0	0	0	0	0	0	1200	88	3.5	1	air	645	240	air	57	1.5	630	120	air	25	0	air	25	0	air	12	3.5	1.1	0.001	1008	41
89.77	6.95	0.2	3.08	0	0	0	0	0	0	0	0	0	0	0	0	0	1200	97.5	3	1	air	25	0	air	50	1.5	680	60	oil	1100	20	oil	25	0	air	25	6	1.5	0.0005	793	29.9
89.77	6.95	0.2	3.08	0	0	0	0	0	0	0	0	0	0	0	0	0	1200	97.5	3	1	air	25	0	air	50	1.5	760	60	oil	1100	20	oil	25	0	air	25	6	1.5	0.0005	1105	21.4
92.172	7.22	0.093	0.013	0.49	0	0	0	0	0	0	0	0	0	0.005	0.007	0	1100		3	1	air	25	0	air			25	0	air	25	0	air	25	0	air	25	6.3	3	0.001	1227	24.3
92.172	7.22	0.093	0.013	0.49	0	0	0	0	0	0	0	0	0	0.005	0.007	0	1100		3	1	air	25	0	air	55	1.45	640	30	air	25	0	air	25	0	air	25	6.3	1.45	0.001	1397	21.8
92.92	5.9	0.28	0.9	0	0	0	0	0	0	0	0	0	0	0	0	0	1200	95	1.5	1	air	25	0	air			640	60	air	25	0	air	25	0	air	25	6	1.5	0.001	1040	43.2
92.92	5.9	0.28	0.9	0	0	0	0	0	0	0	0	0	0	0	0	0	1200	95	1.5	1	air	25	0	air			660	60	air	25	0	air	25	0	air	25	6	1.5	0.001	1160	44.1
92.92	5.9	0.28	0.9	0	0	0	0	0	0	0	0	0	0	0	0	0	1200	95	1.5	1	air	25	0	air			680	60	air	25	0	air	25	0	air	25	6	1.5	0.001	1400	39
92.92	5.9	0.28	0.9	0	0	0	0	0	0	0	0	0	0	0	0	0	1200	95	1.5	1	air	25	0	air			700	60	air	25	0	air	25	0	air	25	6	1.5	0.001	1550	12
74.113	23.6	0.44	1.8	0.047	0	0	0	0	0	0	0	0	0	0	0	0	1200		17.4	1	water	25	0	air	70	12.18	630	10	water	25	0	air	25	0	air	15	5	1.5	0.0004	865	50.2
74.113	23.6	0.44	1.8	0.047	0	0	0	0	0	0	0	0	0	0	0	0	1200		17.4	1	water	25	0	air	70	12.18	740	10	water	25	0	air	25	0	air	15	5	1.5	0.0004	814	44.4
74.113	23.6	0.44	1.8	0.047	0	0	0	0	0	0	0	0	0	0	0	0	1200		17.4	1	water	25	0	air	70	12.18	900	10	water	25	0	air	25	0	air	15	5	1.5	0.0004	745	66.1
72.008	17.14	0.03	1.8	0	8.99	0	0	0	0	0	0	0	0	0.004	0.007	0.021	1150	75	20	1	air	25	0	air			800	120	water	25	0	air	25	0	air	12	4	2	0.001	568	77.6
71.471	17.59	0.1	1.77	0	9.04	0	0	0	0	0	0	0	0	0.003	0.006	0.02	1150	75	20	1	air	25	0	air			800	120	water	25	0	air	25	0	air	12	4	2	0.001	591	60.3
70.584	18.01	0.32	1.89	0	9.16	0	0	0	0	0	0	0	0	0.005	0.008	0.023	1150	75	20	1	air	25	0	air			800	120	water	25	0	air	25	0	air	12	4	2	0.001	687	73.8
70.117	18.21	0.54	1.99	0	9.11	0	0	0	0	0	0	0	0	0.004	0.005	0.024	1150	75	20	1	air	25	0	air			800	120	water	25	0	air	25	0	air	12	4	2	0.001	796	82.1
62.28	26.6	1.36	9.76	0	0	0	0	0	0	0	0	0	0	0	0	0	1050	85	3	1	water	25	0	air	30	2.1	25	0	air	25	0	air	25	0	air	60	4	2	0.0005	1435	18
62.28	26.6	1.36	9.76	0	0	0	0	0	0	0	0	0	0	0	0	0	1050	85	3	1	water	25	0	air	30	2.1	850	3	water	25	0	air	25	0	air	60	4	2	0.0005	1387	35
62.28	26.6	1.36	9.76	0	0	0	0	0	0	0	0	0	0	0	0	0	1050	85	3	1	water	25	0	air	30	2.1	900	3	water	25	0	air	25	0	air	60	4	2	0.0005	1306	38.42
62.28	26.6	1.36	9.76	0	0	0	0	0	0	0	0	0	0	0	0	0	1050	85	3	1	water	25	0	air	30	2.1	950	3	water	25	0	air	25	0	air	60	4	2	0.0005	1251	43
86.6065	5.15	0.24	4.58	1.42	0.03	0	1.72	0	0.2	0	0	0	0	0.04	0.01	0.0035	900	70	6	1	water	25	0	air	50	3	700	30	water	25	0	air	25	0	air	12	6	3	0.0007	1393	11
86.6065	5.15	0.24	4.58	1.42	0.03	0	1.72	0	0.2	0	0	0	0	0.04	0.01	0.0035	900	70	6	1	water	25	0	air	50	3	800	30	water	25	0	air	25	0	air	12	6	3	0.0007	1420	33
86.6065	5.15	0.24	4.58	1.42	0.03	0	1.72	0	0.2	0	0	0	0	0.04	0.01	0.0035	900	70	6	1	water	25	0	air	50	3	900	30	water	25	0	air	25	0	air	12	6	3	0.0007	1282	5
86.6065	5.15	0.24	4.58	1.42	0.03	0	1.72	0	0.2	0	0	0	0	0.04	0.01	0.0035	900	70	6	1	water	25	0	air	50	3	1000	30	water	25	0	air	25	0	air	12	6	3	0.0007	1220	3
83.624	7.98	0.27	3.96	0.64	0	0	3.5	0	0	0	0	0	0	0.02	0.006	0	1100	88	3	1	air	25	0	air	57	1.3	750	60	water	25	0	air	25	0	air	25	6	1.3	0.0003	1084	23
81.346	18.02	0.62	0.01	0	0	0	0	0	0	0	0	0	0	0	0.004	0	960		3.33	1	air	900	25	water	10	3	25	0	air	25	0	air	25	0	air	30	10	3	0.005	1126	58.5
81.346	18.02	0.62	0.01	0	0	0	0	0	0	0	0	0	0	0	0.004	0	960		3.75	1	air	900	25	water	20	3	25	0	air	25	0	air	25	0	air	30	10	3	0.005	1319	44.2
81.346	18.02	0.62	0.01	0	0	0	0	0	0	0	0	0	0	0	0.004	0	960		5	1	air	900	25	water	40	3	25	0	air	25	0	air	25	0	air	30	10	3	0.005	1609	22.2
81.346	18.02	0.62	0.01	0	0	0	0	0	0	0	0	0	0	0	0.004	0	960		7.5	1	air	900	25	water	60	3	25	0	air	25	0	air	25	0	air	30	10	3	0.005	2075	4.2
81.051	17.98	0.96	0	0	0	0	0	0	0	0	0	0	0	0	0.009	0	960		3.33	1	air	900	15	water	10	3	25	0	air	25	0	air	25	0	air	30	10	3	0.005	1076	58.7
81.051	17.98	0.96	0	0	0	0	0	0	0	0	0	0	0	0	0.009	0	960		3.75	1	air	900	15	water	20	3	25	0	air	25	0	air	25	0	air	30	10	3	0.005	1204	40
81.051	17.98	0.96	0	0	0	0	0	0	0	0	0	0	0	0	0.009	0	960		5	1	air	900	15	water	40	3	25	0	air	25	0	air	25	0	air	30	10	3	0.005	1544	10.2
81.051	17.98	0.96	0	0	0	0	0	0	0	0	0	0	0	0	0.009	0	960		7.5	1	air	900	15	water	60	3	25	0	air	25	0	air	25	0	air	30	10	3	0.005	1870	4.5
78.7	13.9	0.2	0	2.8	4.4	0	0	0	0	0	0	0	0	0	0	0	1100	93	1	1	air	25	0	air			25	0	air	25	0	air	25	0	air	12	3	1	0.0008	1059	40
78.7	13.9	0.2	0	2.8	4.4	0	0	0	0	0	0	0	0	0	0	0	1100	93	1	1	air	25	0	air			200	20	air	25	0	air	25	0	air	12	3	1	0.0008	1398	52
78.7	13.9	0.2	0	2.8	4.4	0	0	0	0	0	0	0	0	0	0	0	1100	93	1	1	air	25	0	air			450	20	air	25	0	air	25	0	air	12	3	1	0.0008	1495	58
78.7	13.9	0.2	0	2.8	4.4	0	0	0	0	0	0	0	0	0	0	0	1100	93	1	1	air	25	0	air			520	20	air	25	0	air	25	0	air	12	3	1	0.0008	1483	58
78.7	13.9	0.2	0	2.8	4.4	0	0	0	0	0	0	0	0	0	0	0	1100	93	1	1	air	25	0	air			850	10	air	25	0	air	25	0	air	12	3	1	0.0008	1221	50
53.95	28.4	1.45	11.1	0	5.1	0	0	0	0	0	0	0	0	0	0	0	1150	82.8	12	1	water	25	0	air			25	0	air	25	0	air	25	0	air	15	4	2	0.001	1080	52
53.95	28.4	1.45	11.1	0	5.1	0	0	0	0	0	0	0	0	0	0	0	1150	82.8	12	1	water	25	0	air			1100	30	air	25	0	air	25	0	air	15	4	2	0.001	951	67.5
55.21	27.4	1.69	10.8	0	4.9	0	0	0	0	0	0	0	0	0	0	0	1150	82.8	12	1	water	25	0	air			25	0	air	25	0	air	25	0	air	15	4	2	0.001	1183	38.2
55.21	27.4	1.69	10.8	0	4.9	0	0	0	0	0	0	0	0	0	0	0	1150	82.8	12	1	water	25	0	air			1100	30	air	25	0	air	25	0	air	15	4	2	0.001	1059	55.1
87.36	3	0.3	2	0	0	0	4.94	0.5	1.6	0	0	0	0.3	0	0	0	1150	92.5	4.5	1	oil	670	300	air	53	1.9	670	60	air	25	0	air	25	0	air	25	6	1.9	0.001	1200	31.2
87.36	3	0.3	2	0	0	0	4.94	0.5	1.6	0	0	0	0.3	0	0	0	1150	92.5	4.5	1	oil	670	300	air	53	1.9	700	10	air	25	0	air	25	0	air	25	6	1.9	0.001	1207	18.7
87.36	3	0.3	2	0	0	0	4.94	0.5	1.6	0	0	0	0.3	0	0	0	1150	92.5	4.5	1	oil	670	300	air	53	1.9	750	10	air	25	0	air	25	0	air	25	6	1.9	0.001	1780	10.8
93.15	4.05	0.22	1.5	0.54	0	0	0	0	0	0.54	0	0	0	0	0	0	1150	86.6	6	1	water	730	20	water	70	1.8	25	0	air	25	0	air	25	0	air	50	12	1.8	0.00067	1941	3.3
93.15	4.05	0.22	1.5	0.54	0	0	0	0	0	0.54	0	0	0	0	0	0	1150	86.6	6	1	water	730	20	water	70	1.8	680	15	water	25	0	air	25	0	air	50	12	1.8	0.00067	775	26.6
93.15	4.05	0.22	1.5	0.54	0	0	0	0	0	0.54	0	0	0	0	0	0	1150	86.6	6	1	water	730	20	water	70	1.8	700	15	water	25	0	air	25	0	air	50	12	1.8	0.00067	869	38.8
93.15	4.05	0.22	1.5	0.54	0	0	0	0	0	0.54	0	0	0	0	0	0	1150	86.6	6	1	water	730	20	water	70	1.8	720	15	water	25	0	air	25	0	air	50	12	1.8	0.00067	1084	30.2
93.15	4.05	0.22	1.5	0.54	0	0	0	0	0	0.54	0	0	0	0	0	0	1150	86.6	6	1	water	730	20	water	70	1.8	740	15	water	25	0	air	25	0	air	50	12	1.8	0.00067	1205	20
93.15	4.05	0.22	1.5	0.54	0	0	0	0	0	0.54	0	0	0	0	0	0	1150	86.6	6	1	water	730	20	water	70	1.8	760	15	water	25	0	air	25	0	air	50	12	1.8	0.00067	1387	13.2
90.455	4.77	0.505	2.75	1.51	0	0	0	0	0	0	0	0	0	0.005	0.002	0.003	1000	87.5	1.5	1	water	25	0	air			750	10	air	25	0	air	25	0	air	19	3	1.5	0.001	1100	78
90.455	4.77	0.505	2.75	1.51	0	0	0	0	0	0	0	0	0	0.005	0.002	0.003	1000	87.5	1.5	2	air	600	30	furnace			750	10	air	25	0	air	25	0	air	19	3	1.5	0.001	1200	71
85.0052	9.8	0.2	3.5	1.2	0	0	0	0	0	0	0	0	0.29	0	0	0.0048	1200	95	2.5	1	air	25	0	air			25	0	air	25	0	air	25	0	air	25	6.25	2.5	0.00067	1605.4	15
85.0052	9.8	0.2	3.5	1.2	0	0	0	0	0	0	0	0	0.29	0	0	0.0048	1200	95	2.5	1	air	25	0	air			450	30	air	25	0	air	25	0	air	25	6.25	2.5	0.00067	1453	21.4
85.0052	9.8	0.2	3.5	1.2	0	0	0	0	0	0	0	0	0.29	0	0	0.0048	1200	95	2.5	1	air	25	0	air			750	30	air	25	0	air	25	0	air	25	6.25	2.5	0.00067	1252.2	23.7
85.47	8.03	0.4	6.1	0	0	0	0	0	0	0	0	0	0	0	0	0	1100	92.5	4.5	1	air	25	0	air			800	30	air	25	0	air	25	0	air	50	12.5	4.5	0.001	756	56
90.8	6	0.2	3	0	0	0	0	0	0	0	0	0	0	0	0	0	1200	85	4.5	1	air	25	0	air			740	30	air	25	0	air	25	0	air	25	5	1.2	0.0001	1015	38
90.2	6	0.2	3	0.6	0	0	0	0	0	0	0	0	0	0	0	0	1200	85	4.5	1	air	25	0	air			740	30	air	25	0	air	25	0	air	25	5	1.2	0.0001	855	68.1
61	30	1	8	0	0	0	0	0	0	0	0	0	0	0	0	0	1200		5	1	air	25	0	air			1050	60	water	25	0	air	25	0	air	13	5	2	0.0001	761	59
61	30	1	8	0	0	0	0	0	0	0	0	0	0	0	0	0	1200		5	1	air	25	0	air			1050	60	water	25	0	air	25	0	air	13	5	2	0.001	789	72
90.3	7.8	0.14	1.65	0	0	0	0	0	0	0	0.11	0	0	0	0	0	1200	86.7	4	1	air	650	60	air	45	2.2	680	5	air	25	0	air	25	0	air	50	12.5	2.2	0.0006	1202	39
90.3	7.8	0.14	1.65	0	0	0	0	0	0	0	0.11	0	0	0	0	0	1200	86.7	4	1	air	650	60	air	45	2.2	680	10	air	25	0	air	25	0	air	50	12.5	2.2	0.0006	1280	53
90.3	7.8	0.14	1.65	0	0	0	0	0	0	0	0.11	0	0	0	0	0	1200	86.7	4	1	air	650	60	air	45	2.2	680	30	air	25	0	air	25	0	air	50	12.5	2.2	0.0006	1231	24
90.3	7.8	0.14	1.65	0	0	0	0	0	0	0	0.11	0	0	0	0	0	1200	86.7	4	1	air	650	60	air	45	2.2	680	120	air	25	0	air	25	0	air	50	12.5	2.2	0.0006	1218	17
86.51	7.12	0.052	1.39	1.4	0	0	1.42	0.5	1.57	0	0	0	0	0.012	0.015	0.011	1200	98	2	1	air	25	0	air	50	1	650	30	air	25	0	air	25	0	air	12	2	1	0.001	1076	8.3
86.51	7.12	0.052	1.39	1.4	0	0	1.42	0.5	1.57	0	0	0	0	0.012	0.015	0.011	1200	98	2	1	air	25	0	air	50	1	680	30	air	25	0	air	25	0	air	12	2	1	0.001	1037	4.9
87.39	10.32	0.18	2.11	0	0	0	0	0	0	0	0	0	0	0	0	0	1200	86.7	4	2	air	600	60	air	70	1.2	600	30	water	25	0	air	25	0	air	10	4	1.2	0.0004	1055	32.1
85.64	10.22	0.15	2.01	0	0	0	0	0	1.98	0	0	0	0	0	0	0	1200	86.7	4	2	air	600	60	air	70	1.2	600	30	water	25	0	air	25	0	air	10	4	1.2	0.0004	1098	31.5
92.95	5	0.2	1.5	0.1	0	0.2	0	0	0	0.05	0	0	0	0	0	0	1100	95	3	1	air	25	0	air			690	300	air	25	0	air	25	0	air	50	12	3	0.002	990	33.4
92.95	5	0.2	1.5	0.1	0	0.2	0	0	0	0.05	0	0	0	0	0	0	1100	95	3	1	air	25	0	air			700	300	air	25	0	air	25	0	air	50	12	3	0.002	1015	42.5
92.95	5	0.2	1.5	0.1	0	0.2	0	0	0	0.05	0	0	0	0	0	0	1100	95	3	1	air	25	0	air			710	300	air	25	0	air	25	0	air	50	12	3	0.002	1065	24.6
83.06	11.15	0.07	5.6	0.12	0	0	0	0	0	0	0	0	0	0	0	0	1200		6	1	air	25	0	air	70	2	1200	3	water	25	0	air	25	0	air	20	5	2	0.01	675	38.1
83.06	11.15	0.07	5.6	0.12	0	0	0	0	0	0	0	0	0	0	0	0	1200		6	1	air	25	0	air	70	2	1200	5	water	25	0	air	25	0	air	20	5	2	0.01	500	26.75
83.06	11.15	0.07	5.6	0.12	0	0	0	0	0	0	0	0	0	0	0	0	1200		6	1	air	25	0	air	70	2	1200	10	water	25	0	air	25	0	air	20	5	2	0.01	495	26.8
91.8	8	0.2	0	0	0	0	0	0	0	0	0	0	0	0	0	0	1200	86.7	4	1	air	25	0	air			650	60	water	25	0	air	25	0	air	25	6	4	0.002	1467	28.8
90.3	8	0.2	1.5	0	0	0	0	0	0	0	0	0	0	0	0	0	1200	86.7	4	1	air	25	0	air			680	60	water	25	0	air	25	0	air	25	6	4	0.002	1311	36
88.8	8	0.2	3	0	0	0	0	0	0	0	0	0	0	0	0	0	1200	86.7	4	1	air	25	0	air			700	60	water	25	0	air	25	0	air	25	6	4	0.002	911	44.5
92.172	7.22	0.093	0.013	0.49	0	0	0	0	0	0	0	0	0	0.005	0.007	0	1100		3	1	air	25	0	air			25	0	air	25	0	air	25	0	air	25	6.3	3	0.001	1227	24.3
92.172	7.22	0.093	0.013	0.49	0	0	0	0	0	0	0	0	0	0.005	0.007	0	1100		3	1	air	25	0	air	55	1.45	640	30	air	25	0	air	25	0	air	25	6.3	1.45	0.001	1397	21.8
80.5	12	0.5	7	0	0	0	0	0	0	0	0	0	0	0	0	0	1100	95	2.8	2	air	650	60	air	50	1.4	830	10	air	25	0	air	25	0	air	25	6	1.3	0.0001	894	33.6
80.4	12	0.5	7	0	0	0	0	0	0	0	0	0	0.1	0	0	0	1100	95	2.8	2	air	650	60	air	50	1.4	830	10	air	25	0	air	25	0	air	25	6	1.3	0.0001	891	27.4
79.5	12	0.5	7	0	0	0	0	0	1	0	0	0	0	0	0	0	1100	95	2.8	2	air	650	60	air	50	1.4	830	10	air	25	0	air	25	0	air	25	6	1.3	0.0001	898	28.9
97.12	1.15	0.15	0.18	0.3	0.2	0	0.5	0.1	0	0	0	0	0.3	0	0	0	1200	93	6	1	air	200	0.1	air			1000	30	water	25	0	air	25	0	air	25	6	6	0.001	1333.3	13.52
85.7	9	0.3	5	0	0	0	0	0	0	0	0	0	0	0	0	0	1100	83.3	10	1	furnace	25	0	air			1100	60	water	25	0	air	25	0	air	6.4	2.5	2	0.001	892	3.9
85.7	9	0.3	5	0	0	0	0	0	0	0	0	0	0	0	0	0	1100	83.3	10	1	furnace	25	0	air			1100	60	water	25	0	air	200	60	water	6.4	2.5	2	0.001	1179	7.7
85.2	10.12	0.31	3.81	0.56	0	0	0	0	0	0	0	0	0	0	0	0	1200	93.7	2	1	air	700	60	water	50	1	750	10	water	25	0	air	25	0	air	25	6	1	0.005	960	40.1
85.2	10.12	0.31	3.81	0.56	0	0	0	0	0	0	0	0	0	0	0	0	1200	93.7	2	1	air	700	60	water	50	1	800	10	water	25	0	air	25	0	air	25	6	1	0.005	1048	63.5
85.2	10.12	0.31	3.81	0.56	0	0	0	0	0	0	0	0	0	0	0	0	1200	93.7	2	1	air	700	60	water	50	1	850	10	water	25	0	air	25	0	air	25	6	1	0.005	1053	25.3
92.1	6	0.2	1	0	0	0	0	0.2	0	0.5	0	0	0	0	0	0	700	96	1.5	1	air	25	0	air			650	60	air	25	0	air	25	0	air	25	6	1.5	0.005	1570	29
92.1	6	0.2	1	0	0	0	0	0.2	0	0.5	0	0	0	0	0	0	700	96	1.5	1	air	25	0	air			650	60	air	25	0	air	25	0	air	25	6	1.5	0.005	1550	32
92.1	6	0.2	1	0	0	0	0	0.2	0	0.5	0	0	0	0	0	0	700	96	1.5	1	air	25	0	air			650	60	air	25	0	air	25	0	air	25	6	1.5	0.005	1553	37
92.1	6	0.2	1	0	0	0	0	0.2	0	0.5	0	0	0	0	0	0	700	96	1.5	1	air	25	0	air			650	60	air	25	0	air	25	0	air	25	6	1.5	0.005	1672	25
88.44	8.19	0.21	3.16	0	0	0	0	0	0	0	0	0	0	0	0	0	1100		3.5	1	air	300	30	air	60	1.4	670	30	water	25	0	air	25	0	air	25	6	1.2	0.001	896	19.9
88.44	8.19	0.21	3.16	0	0	0	0	0	0	0	0	0	0	0	0	0	1100		3.5	1	air	300	30	air	60	1.4	700	30	water	25	0	air	25	0	air	25	6	1.2	0.001	903	32.2
88.44	8.19	0.21	3.16	0	0	0	0	0	0	0	0	0	0	0	0	0	1100		3.5	1	air	300	30	air	60	1.4	730	30	water	25	0	air	25	0	air	25	6	1.2	0.001	980	35.8
88.76	8.08	0.2	2.78	0	0	0	0	0	0	0	0	0	0.18	0	0	0	1100		3.5	1	air	300	30	air	60	1.4	670	30	water	25	0	air	25	0	air	25	6	1.2	0.001	1067	17.4
88.76	8.08	0.2	2.78	0	0	0	0	0	0	0	0	0	0.18	0	0	0	1100		3.5	1	air	300	30	air	60	1.4	700	30	water	25	0	air	25	0	air	25	6	1.2	0.001	999	32.9
88.76	8.08	0.2	2.78	0	0	0	0	0	0	0	0	0	0.18	0	0	0	1100		3.5	1	air	300	30	air	60	1.4	730	30	water	25	0	air	25	0	air	25	6	1.2	0.001	1114	38.5
86.63	11.2	0.22	1.95	0	0	0	0	0	0	0	0	0	0	0	0	0	1200	87	4	1	air	25	0	air	75	1	650	5	water	25	0	air	25	0	air	25	12.5	1	0.0002	1450	39.3
86.63	11.2	0.22	1.95	0	0	0	0	0	0	0	0	0	0	0	0	0	1200	87	4	1	air	25	0	air	75	1	650	5	water	25	0	air	25	0	air	25	12.5	1	0.002	1251	39.1
93.24	4.25	0.17	2.14	0	0	0	0	0	0	0.2	0	0	0	0	0	0	1150	93.3	3	1	water	400	0.1	air			725	30	air	25	0	air	25	0	air	25	6	3	0.001	1011	35.6
92.71	4.08	0.19	2.12	0	0	0	0	0	0	0.9	0	0	0	0	0	0	1150	93.3	3	1	water	400	0.1	air			725	30	air	25	0	air	25	0	air	25	6	3	0.001	1071	29.8
83.634	7.98	0.26	3.96	0.64	0	0	3.5	0	0	0	0	0	0	0.02	0.006	0	1250	88	3	1	air	25	0	air	57	1.3	760	60	water	25	0	air	25	0	air	25	6	1.3	0.0003	1022	29.4
83.634	7.98	0.26	3.96	0.64	0	0	3.5	0	0	0	0	0	0	0.02	0.006	0	1250	88	3	1	air	25	0	air	57	1.3	800	60	water	25	0	air	25	0	air	25	6	1.3	0.0003	843	56.3
83.634	7.98	0.26	3.96	0.64	0	0	3.5	0	0	0	0	0	0	0.02	0.006	0	1250	88	3	1	air	25	0	air	57	1.3	840	60	water	25	0	air	25	0	air	25	6	1.3	0.0003	800	25
89.95	3.9	0.35	5.8	0	0	0	0	0	0	0	0	0	0	0	0	0	1200	90	3.5	2	air	700	60	air	63	1.3	800	2.5	air	25	0	air	400	3	air	20	5	1.3	0.0008	880	40
70.84	16.36	0.84	8.94	3.02	0	0	0	0	0	0	0	0	0	0	0	0	1180	96	4.3	1	water	1000	60	water	77	1	1000	15	air	25	0	air	25	0	air	25	10	1	0.001	1044	38
84.89	8.9	0.06	1.29	0	0	0	2.9	0	1.96	0	0	0	0	0	0	0	1150	88	3.6	1	air	25	0	air			1100	15	water	25	0	air	25	0	air	15	5	3	0.003	1151	18.3
89.37	7.2	0.21	3.22	0	0	0	0	0	0	0	0	0	0	0	0	0	1150	88	3	1	air	25	0	air			650	60	water	25	0	air	200	20	air	8	2	1	0.005	973	21.3
89.37	7.2	0.21	3.22	0	0	0	0	0	0	0	0	0	0	0	0	0	1150	88	3	1	air	25	0	air			700	60	water	25	0	air	200	20	air	8	2	1	0.005	905	42.8
89.37	7.2	0.21	3.22	0	0	0	0	0	0	0	0	0	0	0	0	0	1150	88	3	1	air	25	0	air			750	60	water	25	0	air	200	20	air	8	2	1	0.005	1126	51.8
89.37	7.2	0.21	3.22	0	0	0	0	0	0	0	0	0	0	0	0	0	1150	88	3	1	air	25	0	air			800	60	water	25	0	air	200	20	air	8	2	1	0.005	1533	27.6
89	7.2	0.21	3.22	0	0.25	0	0	0.12	0	0	0	0	0	0	0	0	1150	88	3	1	air	25	0	air			650	60	water	25	0	air	25	0	air	8	2	1	0.005	1053	24.1
89	7.2	0.21	3.22	0	0.25	0	0	0.12	0	0	0	0	0	0	0	0	1150	88	3	1	air	25	0	air			700	60	water	25	0	air	25	0	air	8	2	1	0.005	992	40.3
89	7.2	0.21	3.22	0	0.25	0	0	0.12	0	0	0	0	0	0	0	0	1150	88	3	1	air	25	0	air			750	60	water	25	0	air	25	0	air	8	2	1	0.005	1286	49.8
89	7.2	0.21	3.22	0	0.25	0	0	0.12	0	0	0	0	0	0	0	0	1150	88	3	1	air	25	0	air			800	60	water	25	0	air	25	0	air	8	2	1	0.005	1588	27.8
91.93	6.22	0.28	0	1.57	0	0	0	0	0	0	0	0	0	0	0	0	1100	95	3	1	furnace	630	1440	air			670	10	air	25	0	air	25	0	air	50	12.5	3	0.00067	1213	31.4
91.93	6.22	0.28	0	1.57	0	0	0	0	0	0	0	0	0	0	0	0	1100	95	3	1	furnace	630	1440	air	20	2.4	670	10	air	25	0	air	25	0	air	50	12.5	2.4	0.00067	1203	37.1
91.93	6.22	0.28	0	1.57	0	0	0	0	0	0	0	0	0	0	0	0	1100	95	3	1	furnace	630	1440	air	40	1.8	670	10	air	25	0	air	25	0	air	50	12.5	1.8	0.00067	1353	30.1
86.8	10.2	0.4	2	0	0	0	0	0	0	0	0	0	0.6	0	0	0	1050	90	3	1	air	25	0	air	46.7	1.6	600	10	air	25	0	air	25	0	air	25	6	1.6	0.0003	1419	2.1
86.8	10.2	0.4	2	0	0	0	0	0	0	0	0	0	0.6	0	0	0	1050	90	3	1	air	25	0	air	46.7	1.6	650	10	air	25	0	air	25	0	air	25	6	1.6	0.0003	1456	17.6
86.8	10.2	0.4	2	0	0	0	0	0	0	0	0	0	0.6	0	0	0	1050	90	3	1	air	25	0	air	46.7	1.6	700	10	air	25	0	air	25	0	air	25	6	1.6	0.0003	1293	14.3
86.8	10.2	0.4	2	0	0	0	0	0	0	0	0	0	0.6	0	0	0	1050	90	3	1	air	25	0	air	46.7	1.6	750	10	air	25	0	air	25	0	air	25	6	1.6	0.0003	995	8.4
87.6426	10.2	0.21	1.94	0	0	0	0	0	0	0	0	0	0	0.0001	0.007	0.0003	1200	96	4	1	air	650	60	air	50	2	650	60	water	25	0	air	25	0	air	25	6	2	0.00067	1011	56.5
87.6426	10.2	0.21	1.94	0	0	0	0	0	0	0	0	0	0	0.0001	0.007	0.0003	1200	96	4	1	air	650	60	air	50	2	700	60	water	25	0	air	25	0	air	25	6	2	0.00067	1455	26.1
90.58	6.12	0.22	3.08	0	0	0	0	0	0	0	0	0	0	0	0	0	1150	85	4.5	1	air	25	0	air			740	3	air	25	0	air	25	0	air	25	6	1.2	0.0001	963	15
90.31	6.06	0.18	2.87	0.58	0	0	0	0	0	0	0	0	0	0	0	0	1150	85	4.5	1	air	25	0	air			740	3	air	25	0	air	25	0	air	25	6	1.2	0.0001	987	18
90.58	6.12	0.22	3.08	0	0	0	0	0	0	0	0	0	0	0	0	0	1150	85	4.5	1	air	25	0	air			740	30	water	25	0	air	25	0	air	25	6	1.2	0.0001	1015	38
90.31	6.06	0.18	2.87	0.58	0	0	0	0	0	0	0	0	0	0	0	0	1150	85	4.5	1	air	25	0	air			740	30	water	25	0	air	25	0	air	25	6	1.2	0.0001	855	68.1
78.81	12.87	0.72	7.6	0	0	0	0	0	0	0	0	0	0	0	0	0	1150		4	1	water	1000	60	water	75	1	800	15	water	25	0	air	25	0	air	25	12.5	1	0.0013	984	24.5
78.81	12.87	0.72	7.6	0	0	0	0	0	0	0	0	0	0	0	0	0	1150		4	1	water	1000	60	water	75	1	900	15	water	25	0	air	25	0	air	25	12.5	1	0.0013	922	36.4
78.81	12.87	0.72	7.6	0	0	0	0	0	0	0	0	0	0	0	0	0	1150		4	1	water	1000	60	water	75	1	1000	15	water	25	0	air	25	0	air	25	12.5	1	0.0013	870	25.1
78.28	12.74	1.17	7.81	0	0	0	0	0	0	0	0	0	0	0	0	0	1150		4	1	water	1000	60	water	75	1	800	15	water	25	0	air	25	0	air	25	12.5	1	0.0013	1321	9.5
78.28	12.74	1.17	7.81	0	0	0	0	0	0	0	0	0	0	0	0	0	1150		4	1	water	1000	60	water	75	1	900	15	water	25	0	air	25	0	air	25	12.5	1	0.0013	1086	25
78.28	12.74	1.17	7.81	0	0	0	0	0	0	0	0	0	0	0	0	0	1150		4	1	water	1000	60	water	75	1	1000	15	water	25	0	air	25	0	air	25	12.5	1	0.0013	841	29.3
86.571	7.2	0.22	3.1	0	0	0	2.9	0	0	0	0	0	0	0.006	0.003	0	1200	92.5	5.2	1	air	25	0	air	80.7	1	670	60	air	25	0	air	25	0	air	25	10	1	0.001	951	25.9
86.571	7.2	0.22	3.1	0	0	0	2.9	0	0	0	0	0	0	0.006	0.003	0	1200	92.5	5.2	1	air	25	0	air	80.7	1	680	60	air	25	0	air	25	0	air	25	10	1	0.001	960	53
90.934	8.65	0.11	0.3	0	0	0	0	0	0	0	0	0	0	0.003	0.003	0	1200	91	4.5	1	water	570	60	air	68.8	1.4	650	30	air	25	0	air	25	0	air	26	6	1.4	0.001	1313	27.01
77.89	11	1.25	9.86	0	0	0	0	0	0	0	0	0	0	0	0	0	1200	88.5	4	1	air	1000	60	water	75	1	1000	10	water	25	0	air	25	0	air	25	6	1	0.001	1314	22.2
76.55	22	0.45	1	0	0	0	0	0	0	0	0	0	0	0	0	0	1100	60	12	2	water	25	0	air			450	60	air	25	0	air	25	0	air	25	6	1	0.001	793	84.5
75.55	22	0.45	1	0	0	0	1	0	0	0	0	0	0	0	0	0	1100	60	12	2	water	25	0	air			450	60	air	25	0	air	25	0	air	25	6	1	0.001	799	80.2
67.3	20	1.2	11.5	0	0	0	0	0	0	0	0	0	0	0	0	0	1000	86	7	1	air	25	0	air			1050	120	water	25	0	air	25	0	air	25	10	3	0.0028	1233	15.4
84.78	11.19	0.2	3.83	0	0	0	0	0	0	0	0	0	0	0	0	0	1200	86.6	4	1	air	25	0	air			775	60	water	25	0	air	400	40	air	25	5	1.4	0.0001	889.6	79.6
76.29	15	0.8	7	0	0	0	0	0	0	0	0	0.01	0.9	0	0	0	1100	95.3	2.8	1	furnace	650	60	air	50	1.4	830	1	air	25	0	air	25	0	air	25	6	1.3	0.001	1051	40.1
78	12.21	0.23	0	2.7	2.08	0	2.62	0	1.85	0	0	0.31	0	0	0	0	1150	80	1.6	1	water	25	0	air	5	1.52	25	0	air	25	0	air	25	0	air	12.5	6	1.52	0.004	1012	25
78	12.21	0.23	0	2.7	2.08	0	2.62	0	1.85	0	0	0.31	0	0	0	0	1150	80	1.6	1	water	25	0	air	5	1.52	800	360	water	25	0	air	25	0	air	12.5	6	1.52	0.004	1126	42.2
78	12.21	0.23	0	2.7	2.08	0	2.62	0	1.85	0	0	0.31	0	0	0	0	1150	80	1.6	1	water	25	0	air	5	1.52	800	360	water	25	0	air	25	0	air	12.5	6	1.52	0.004	1100	60
96.568	2.98	0.13	0.004	0.28	0	0.02	0	0	0	0	0	0.003	0	0.01	0.005	0	1100		4	1	air	25	0	air	53.3	1.4	750	3	air	800	5	air	25	0	air	25	6	1.4	0.001	1419	9.3
96.568	2.98	0.13	0.004	0.28	0	0.02	0	0	0	0	0	0.003	0	0.01	0.005	0	1100		4	1	air	25	0	air	53.3	1.4	750	3	air	820	5	air	25	0	air	25	6	1.4	0.001	1412	9.6
96.568	2.98	0.13	0.004	0.28	0	0.02	0	0	0	0	0	0.003	0	0.01	0.005	0	1100		4	1	air	25	0	air	53.3	1.4	750	3	air	840	5	air	25	0	air	25	6	1.4	0.001	1398	8.9
96.568	2.98	0.13	0.004	0.28	0	0.02	0	0	0	0	0	0.003	0	0.01	0.005	0	1100		4	1	air	25	0	air	53.3	1.4	750	3	air	800	5	water	25	0	air	25	6	1.4	0.001	1599	9.7
96.568	2.98	0.13	0.004	0.28	0	0.02	0	0	0	0	0	0.003	0	0.01	0.005	0	1100		4	1	air	25	0	air	53.3	1.4	750	3	air	820	5	water	25	0	air	25	6	1.4	0.001	1646	8.9
96.568	2.98	0.13	0.004	0.28	0	0.02	0	0	0	0	0	0.003	0	0.01	0.005	0	1100		4	1	air	25	0	air	53.3	1.4	750	3	air	840	5	water	25	0	air	25	6	1.4	0.001	1566	7.6
94.328	5.1	0.15	0.01	0.37	0	0.02	0	0	0	0	0	0	0	0.016	0.006	0	1100		4	1	air	25	0	air	53.3	1.4	750	3	air	750	5	air	25	0	air	25	6	1.4	0.001	1640	9.4
94.328	5.1	0.15	0.01	0.37	0	0.02	0	0	0	0	0	0	0	0.016	0.006	0	1100		4	1	air	25	0	air	53.3	1.4	750	3	air	770	5	air	25	0	air	25	6	1.4	0.001	1664	9.7
94.328	5.1	0.15	0.01	0.37	0	0.02	0	0	0	0	0	0	0	0.016	0.006	0	1100		4	1	air	25	0	air	53.3	1.4	750	3	air	790	5	air	25	0	air	25	6	1.4	0.001	1725	9.6
92.075	7.2	0.21	0.057	0.39	0	0	0	0	0	0	0	0	0	0.035	0.033	0	1100		4	1	air	25	0	air	53.3	1.4	750	3	air	710	5	air	25	0	air	25	6	1.4	0.001	1863	10.5
92.075	7.2	0.21	0.057	0.39	0	0	0	0	0	0	0	0	0	0.035	0.033	0	1100		4	1	air	25	0	air	53.3	1.4	750	3	air	730	5	air	25	0	air	25	6	1.4	0.001	1856	10.8
92.075	7.2	0.21	0.057	0.39	0	0	0	0	0	0	0	0	0	0.035	0.033	0	1100		4	1	air	25	0	air	53.3	1.4	750	3	air	750	5	air	25	0	air	25	6	1.4	0.001	1844	10.7
93.4	5.2	0.15	1.1	0.1	0.05	0	0	0	0	0	0	0	0	0	0	0	1000	86.7	4	1	air	650	360	air	60	1.6	675	10	air	25	0	air	25	0	air	25	6	1.6	0.001	914	43
91.25	3.5	0.25	5	0	0	0	0	0	0	0	0	0	0	0	0	0	1050		3.5	1	air	650	60	air	65.7	1.2	850	5	water	25	0	air	25	0	air	34	6.4	1.2	0.001	820	40
84.75	10	0.25	5	0	0	0	0	0	0	0	0	0	0	0	0	0	1050		3.5	1	air	650	60	air	65.7	1.2	850	5	water	25	0	air	25	0	air	34	6.4	1.2	0.001	750	44
78.8992	12.77	0.72	7.6	0	0	0	0	0	0	0	0	0	0	0.005	0.0058	0	1150		4	1	water	1000	60	water	75	1	900	60	water	25	0	air	25	0	air	25	12.5	1	0.001	882	28.1
75.7198	15.51	0.83	7.93	0	0	0	0	0	0	0	0	0	0	0.005	0.0052	0	1150		4	1	water	1000	60	water	75	1	900	60	water	25	0	air	25	0	air	25	6	2	0.001	871	44.7
73.06	18.12	0.87	7.95	0	0	0	0	0	0	0	0	0	0	0	0	0	1150		4	1	water	1000	60	water	75	1	900	60	water	25	0	air	25	0	air	25	6	2	0.001	879	46.7
67.55	19.1	1.45	11.9	0	0	0	0	0	0	0	0	0	0	0	0	0	1100		7	1	air	25	0	air			1050	120	air	25	0	air	25	0	air	25	6	2	0.001	1265	6.1
65.94	19	1.41	11.8	0	1.85	0	0	0	0	0	0	0	0	0	0	0	1100		7	1	air	25	0	air			1050	120	air	25	0	air	25	0	air	25	6	2	0.001	1197	23.8
62.19	20	1.43	11.5	0	4.88	0	0	0	0	0	0	0	0	0	0	0	1100		7	1	air	25	0	air			1050	120	air	25	0	air	25	0	air	25	6	2	0.001	1093	40
62.32	18.9	1.47	11.9	0	5.41	0	0	0	0	0	0	0	0	0	0	0	1100		7	1	air	25	0	air			1050	120	air	25	0	air	25	0	air	25	6	2	0.001	1266	21.6
61.71	18.6	1.68	11.9	0	6.11	0	0	0	0	0	0	0	0	0	0	0	1100		7	1	air	25	0	air			1050	120	air	25	0	air	25	0	air	25	6	2	0.001	1307	5.5
91.11	6.25	0.4	2.24	0	0	0	0	0	0	0	0	0	0	0	0	0	1150	93.3	3	1	water	540	0.1	air			700	20	air	25	0	air	25	0	air	25	6	3	0.001	1071	65
91.11	6.25	0.4	2.24	0	0	0	0	0	0	0	0	0	0	0	0	0	1150	93.3	3	1	water	540	0.1	air			725	20	air	25	0	air	25	0	air	25	6	3	0.001	1393	43
89.994	5.69	0.048	0	0.42	0	0	1.96	0	1.88	0	0	0	0	0.004	0.004	0	900		8	1	air	25	0	air	75	1.5	640	3	air	25	0	air	25	0	air	25	6	1.5	0.0001	1210	23
87.942	8.94	0.22	0	2.89	0	0	0	0	0	0	0	0	0	0.004	0.004	0	1200	90	4	1	air	25	0	air			640	300	water	25	0	air	25	0	air	25	6	4	0.001	1651	12.58
88.3	8.5	0.2	3	0	0	0	0	0	0	0	0	0	0	0	0	0	1150	86.6	4	1	air	25	0	air	75	1	25	0	air	25	0	air	25	0	air	20	5	1	0.0025	982	53.6
86.58	7.2	0.22	3.1	0	0	0	2.9	0	0	0	0	0	0	0	0	0	1180	92.5	5.2	1	air	25	0	air	80.7	1	720	10	air	25	0	air	25	0	air	25	10	1	0.001	1169.4	30.1
87.85	10.16	0.12	1.87	0	0	0	0	0	0	0	0	0	0	0	0	0	1100	80	4	1	air	25	0	air	62.5	1.5	625	60	air	25	0	air	25	0	air	10	3	0.5	0.001	1099	26.6
87.85	10.16	0.12	1.87	0	0	0	0	0	0	0	0	0	0	0	0	0	1100	80	4	1	air	25	0	air	62.5	1.5	650	60	air	25	0	air	25	0	air	10	3	0.5	0.001	1163	44.8
87.85	10.16	0.12	1.87	0	0	0	0	0	0	0	0	0	0	0	0	0	1100	80	4	1	air	25	0	air	62.5	1.5	675	60	air	25	0	air	25	0	air	10	3	0.5	0.001	1330	31.1
87.85	10.16	0.12	1.87	0	0	0	0	0	0	0	0	0	0	0	0	0	1100	80	4	1	air	25	0	air	62.5	1.5	700	60	air	25	0	air	25	0	air	10	3	0.5	0.001	1420	18.2
82.1799	16.07	0.81	0	0.47	0	0	0	0	0	0	0	0	0.47	0	0	0.00014	1200	80	5	1	air	25	0	air	80	1	850	1	water	25	0	air	25	0	air	15.6	5	1	0.001	1368	38
82.1799	16.07	0.81	0	0.47	0	0	0	0	0	0	0	0	0.47	0	0	0.00014	1200	80	5	1	air	25	0	air	80	1	850	15	water	25	0	air	25	0	air	15.6	5	1	0.001	1240	38
81.3758	15.13	0.23	3.22	0	0	0	0	0	0	0.03	0	0	0	0.0061	0.0081	0	1200	90	3	1	air	25	0	air	66.7	1	850	2	air	25	0	air	25	0	air	10	5	1	0.07	970	63.4
81.3758	15.13	0.23	3.22	0	0	0	0	0	0	0.03	0	0	0	0.0061	0.0081	0	1200	90	3	1	air	25	0	air	66.7	1	850	2	air	25	0	air	25	0	air	10	5	1	0.007	1024	42.7
89.55	6.9	0.35	3.2	0	0	0	0	0	0	0	0	0	0	0	0	0	1150		4	1	air	770	30	air	50	2	650	60	water	25	0	air	25	0	air	30	12.5	2	0.001	1115	19
89.55	6.9	0.35	3.2	0	0	0	0	0	0	0	0	0	0	0	0	0	1150		4	1	air	770	30	air	50	2	700	60	water	25	0	air	25	0	air	30	12.5	2	0.001	1040	38
89.55	6.9	0.35	3.2	0	0	0	0	0	0	0	0	0	0	0	0	0	1150		4	1	air	770	30	air	50	2	750	3	water	25	0	air	25	0	air	30	12.5	2	0.001	921	34
89.55	6.9	0.35	3.2	0	0	0	0	0	0	0	0	0	0	0	0	0	1150		4	1	air	770	30	air	50	2	750	10	water	25	0	air	25	0	air	30	12.5	2	0.001	930	35
89.55	6.9	0.35	3.2	0	0	0	0	0	0	0	0	0	0	0	0	0	1150		4	1	air	770	30	air	50	2	750	30	water	25	0	air	25	0	air	30	12.5	2	0.001	919	60
89.55	6.9	0.35	3.2	0	0	0	0	0	0	0	0	0	0	0	0	0	1150		4	1	air	770	30	air	50	2	750	60	water	25	0	air	25	0	air	30	12.5	2	0.001	1118	67
89.55	6.9	0.35	3.2	0	0	0	0	0	0	0	0	0	0	0	0	0	1150		4	1	air	770	30	air	50	2	750	90	water	25	0	air	25	0	air	30	12.5	2	0.001	897	36
89.55	6.9	0.35	3.2	0	0	0	0	0	0	0	0	0	0	0	0	0	1150		4	1	air	770	30	air	50	2	800	60	water	25	0	air	25	0	air	30	12.5	2	0.001	1157	35
82.81	16.86	0.05	0	0.28	0	0	0	0	0	0	0	0	0	0	0	0	1050	95	2.7	1	air	1100	60	air	44.4	1.5	700	20	water	25	0	air	25	0	air	25	8	1.5	0.001	972	41.3
82.81	16.86	0.05	0	0.28	0	0	0	0	0	0	0	0	0	0	0	0	1050	95	2.7	1	air	1100	60	air	44.4	1.5	800	20	water	25	0	air	25	0	air	25	8	1.5	0.001	987	45
82.81	16.86	0.05	0	0.28	0	0	0	0	0	0	0	0	0	0	0	0	1050	95	2.7	1	air	1100	60	air	44.4	1.5	900	20	water	25	0	air	25	0	air	25	8	1.5	0.001	824	52.5
82.81	16.86	0.05	0	0.28	0	0	0	0	0	0	0	0	0	0	0	0	1050	95	2.7	1	air	1100	60	air	44.4	1.5	1000	20	water	25	0	air	25	0	air	25	8	1.5	0.001	800	57.7
82.78	15	0.4	0	1	0	0	0	0.3	0	0	0	0	0.5	0.01	0.01	0	1100	94	2.8	1	air	25	0	air	29	2	25	0	air	25	0	air	25	0	air	25	6	1	0.001	1500	44
93.3	5.5	0.2	1	0	0	0	0	0	0	0	0	0	0	0	0	0	1150	87	4	1	air	25	0	air	75	1	650	9	water	25	0	air	25	0	air	25	12.5	1	0.002	1110	45.2
77.75	11	1.25	10	0	0	0	0	0	0	0	0	0	0	0	0	0	1200	94.2	2	1	air	25	0	air			1000	20	air	25	0	air	25	0	air	25	6	1	0.001	1213	5
77.75	11	1.25	10	0	0	0	0	0	0	0	0	0	0	0	0	0	1200	94.2	2	1	air	25	0	air			1000	20	water	25	0	air	25	0	air	25	6	1	0.001	1108.9	10.8
77.18	15	0.8	7	0	0	0	0	0	0	0	0	0	0	0.01	0.01	0	1100	95	3	1	air	650	60	air			25	0	air	25	0	air	25	0	air	25	6	2.5	0.001	1063	22.8
72.18	20	0.8	7	0	0	0	0	0	0	0	0	0	0	0.01	0.01	0	1100	95	3	1	air	650	60	air			25	0	air	25	0	air	25	0	air	25	6	2.5	0.001	1080	25.3
80.18	12	0.8	7	0	0	0	0	0	0	0	0	0	0	0.01	0.01	0	1100	95	3	1	air	650	60	air			800	60	air	25	0	air	25	0	air	25	6	2.5	0.001	998	34.8
77.18	15	0.8	7	0	0	0	0	0	0	0	0	0	0	0.01	0.01	0	1100	95	3	1	air	650	60	air			800	60	air	25	0	air	25	0	air	25	6	2.5	0.001	1020	37.3
72.18	20	0.8	7	0	0	0	0	0	0	0	0	0	0	0.01	0.01	0	1100	95	3	1	air	650	60	air			800	60	air	25	0	air	25	0	air	25	6	2.5	0.001	1005	34.3
93.235	4.75	0.09	0.64	1.24	0	0	0	0	0	0	0	0	0	0.038	0.007	0	1100	87.5	2.5	1	air	1050	30	water			610	60	water	25	0	air	25	0	air	25	6	2.5	0.001	784	11.9
93.235	4.75	0.09	0.64	1.24	0	0	0	0	0	0	0	0	0	0.038	0.007	0	1100	87.5	2.5	1	air	1050	30	water			610	180	water	25	0	air	25	0	air	25	6	2.5	0.001	800	12.6
93.235	4.75	0.09	0.64	1.24	0	0	0	0	0	0	0	0	0	0.038	0.007	0	1100	87.5	2.5	1	air	1050	30	water			630	180	water	25	0	air	25	0	air	25	6	2.5	0.001	776	13
93.235	4.75	0.09	0.64	1.24	0	0	0	0	0	0	0	0	0	0.038	0.007	0	1100	87.5	2.5	1	air	1050	30	water			650	60	water	25	0	air	25	0	air	25	6	2.5	0.001	764	13.2
93.235	4.75	0.09	0.64	1.24	0	0	0	0	0	0	0	0	0	0.038	0.007	0	1100	87.5	2.5	1	air	1050	30	water			670	60	water	25	0	air	25	0	air	25	6	2.5	0.001	979	16.4
83.2	8	0.8	8	0	0	0	0	0	0	0	0	0	0	0	0	0	1150	90	4	1	air	25	0	air			900	60	water	25	0	air	200	5	air	50	5	4	0.001	1675	14.1
83.2	8	0.8	8	0	0	0	0	0	0	0	0	0	0	0	0	0	1150	90	4	1	air	25	0	air			900	60	water	25	0	air	200	20	air	50	5	4	0.001	1508	25
83.2	8	0.8	8	0	0	0	0	0	0	0	0	0	0	0	0	0	1150	90	4	1	air	25	0	air			900	60	water	25	0	air	200	60	air	50	5	4	0.001	1406	28.9
83.2	8	0.8	8	0	0	0	0	0	0	0	0	0	0	0	0	0	1150	90	4	1	air	25	0	air			900	60	water	25	0	air	200	120	air	50	5	4	0.001	1245	5.6
91.38	6.6	0.17	1.1	0	0	0	0	0.22	0	0.5	0	0	0	0	0	0.03	1200		6	1	oil	25	0	air	50	3	650	60	air	25	0	air	25	0	air	25	10	1	0.001	1165	34.1
91.38	6.6	0.17	1.1	0	0	0	0	0.22	0	0.5	0	0	0	0	0	0.03	1200		6	1	oil	25	0	air	75	1.5	650	60	air	25	0	air	25	0	air	25	10	1	0.001	1184	29.9
91.38	6.6	0.17	1.1	0	0	0	0	0.22	0	0.5	0	0	0	0	0	0.03	1200		6	1	furnace	25	0	air	50	3	650	60	air	25	0	air	25	0	air	25	10	1	0.001	1037	36.6
91.38	6.6	0.17	1.1	0	0	0	0	0.22	0	0.5	0	0	0	0	0	0.03	1200		6	1	furnace	25	0	air	75	1.5	650	60	air	25	0	air	25	0	air	25	10	1	0.001	1059	36.7
88.08	10	0.1	0	1	0	0	0	0.3	0	0	0	0	0.5	0.01	0.01	0	1100	94	2.8	2	air	650	60	furnace			25	0	air	25	0	air	25	0	air	25	6	2.5	0.001	1753	11.1
88.08	10	0.1	0	1	0	0	0	0.3	0	0	0	0	0.5	0.01	0.01	0	1100	94	2.8	2	air	650	60	furnace			400	60	water	25	0	air	25	0	air	25	6	2.5	0.001	1596	20.7
88.08	10	0.1	0	1	0	0	0	0.3	0	0	0	0	0.5	0.01	0.01	0	1100	94	2.8	2	air	650	60	furnace			600	60	water	25	0	air	25	0	air	25	6	2.5	0.001	1416	16.4
88.95	7.75	0.52	2.78	0	0	0	0	0	0	0	0	0	0	0	0	0	1180	88.5	4	1	air	25	0	air			25	0	air	25	0	air	25	0	air	25	6	4	0.001	1375.8	5.9
88.95	7.75	0.52	2.78	0	0	0	0	0	0	0	0	0	0	0	0	0	1180	88.5	4	1	air	700	60	air	62.5	1.5	25	0	air	25	0	air	25	0	air	25	6	1.5	0.001	2005.7	6.6
88.95	7.75	0.52	2.78	0	0	0	0	0	0	0	0	0	0	0	0	0	1180	88.5	4	1	air	700	60	air	62.5	1.5	700	30	air	25	0	air	25	0	air	25	6	1.5	0.001	917.8	56.3
82.96	10.75	0.21	6.08	0	0	0	0	0	0	0	0	0	0	0	0	0	1200	87	4	1	air	25	0	air			650	5	water	25	0	air	25	0	air	25	12.5	4	0.002	664	64.6
82.96	10.75	0.21	6.08	0	0	0	0	0	0	0	0	0	0	0	0	0	1200	87	4	1	air	25	0	air			750	5	water	25	0	air	25	0	air	25	12.5	4	0.002	652	62.8
82.96	10.75	0.21	6.08	0	0	0	0	0	0	0	0	0	0	0	0	0	1200	87	4	1	air	25	0	air			850	5	water	25	0	air	25	0	air	25	12.5	4	0.002	638	56.2
82.96	10.75	0.21	6.08	0	0	0	0	0	0	0	0	0	0	0	0	0	1200	87	4	1	air	25	0	air			950	5	water	25	0	air	25	0	air	25	12.5	4	0.002	598	37.5
82.96	10.75	0.21	6.08	0	0	0	0	0	0	0	0	0	0	0	0	0	1200	87	4	1	air	25	0	air			1000	5	water	25	0	air	25	0	air	25	12.5	4	0.002	602	37.8
82.96	10.75	0.21	6.08	0	0	0	0	0	0	0	0	0	0	0	0	0	1200	87	4	1	air	25	0	air	75	1	650	5	water	25	0	air	25	0	air	25	12.5	1	0.002	895	17.2
82.96	10.75	0.21	6.08	0	0	0	0	0	0	0	0	0	0	0	0	0	1200	87	4	1	air	25	0	air	75	1	700	5	water	25	0	air	25	0	air	25	12.5	1	0.002	826.3	17.7
82.96	10.75	0.21	6.08	0	0	0	0	0	0	0	0	0	0	0	0	0	1200	87	4	1	air	25	0	air	75	1	750	5	water	25	0	air	25	0	air	25	12.5	1	0.002	731	30.3
82.96	10.75	0.21	6.08	0	0	0	0	0	0	0	0	0	0	0	0	0	1200	87	4	1	air	25	0	air	75	1	800	5	water	25	0	air	25	0	air	25	12.5	1	0.002	695	31.4
82.96	10.75	0.21	6.08	0	0	0	0	0	0	0	0	0	0	0	0	0	1200	87	4	1	air	25	0	air	75	1	850	5	water	25	0	air	25	0	air	25	12.5	1	0.002	682	36.4
82.96	10.75	0.21	6.08	0	0	0	0	0	0	0	0	0	0	0	0	0	1200	87	4	1	air	25	0	air	75	1	950	5	water	25	0	air	25	0	air	25	12.5	1	0.002	637.5	41.3
89.646	10.19	0.11	0.004	0.05	0	0	0	0	0	0	0	0	0	0	0	0	1100	80	4	1	air	25	0	air	62.5	1.5	600	60	air	25	0	air	25	0	air	10	3	0.5	0.001	1210	38.1
87.8	10.16	0.12	1.87	0.05	0	0	0	0	0	0	0	0	0	0	0	0	1100	80	4	1	air	25	0	air	62.5	1.5	650	60	air	25	0	air	25	0	air	10	3	0.5	0.001	1137	45.4
69.1838	26.4	0.32	2.74	0.209	1.13	0	0	0	0	0	0	0	0	0.0043	0.0019	0.011	1200	83	6	1	air	1100	60	air	83	1	700	20	water	25	0	air	25	0	air	25	12.5	1	0.002	678.5	33.8
68.3682	25.9	0.33	2.83	0.203	2.35	0	0	0	0	0	0	0	0	0.0042	0.0016	0.013	1200	83	6	1	air	1100	60	air	83	1	700	20	water	25	0	air	25	0	air	25	12.5	1	0.002	690	33.4
66.8757	25.8	0.33	2.83	0.197	3.95	0	0	0	0	0	0	0	0	0.0045	0.0008	0.012	1200	83	6	1	air	1100	60	air	83	1	700	20	water	25	0	air	25	0	air	25	12.5	1	0.002	760	29.8
91.15	4.99	0.2	3.03	0.63	0	0	0	0	0	0	0	0	0	0	0	0	1200	83	5	1	air	25	0	air			700	60	air	25	0	air	25	0	air	25	5	5	0.00067	800	47.5
91.15	4.99	0.2	3.03	0.63	0	0	0	0	0	0	0	0	0	0	0	0	1200	83	5	1	air	25	0	air			730	60	air	25	0	air	25	0	air	25	5	5	0.00067	813	62.6
91.15	4.99	0.2	3.03	0.63	0	0	0	0	0	0	0	0	0	0	0	0	1200	83	5	1	air	25	0	air			750	60	air	25	0	air	25	0	air	25	5	5	0.00067	907	61.2
91.15	4.99	0.2	3.03	0.63	0	0	0	0	0	0	0	0	0	0	0	0	1200	83	5	1	air	25	0	air			770	60	air	25	0	air	25	0	air	25	5	5	0.00067	1097	35.1
91.15	4.99	0.2	3.03	0.63	0	0	0	0	0	0	0	0	0	0	0	0	1200	83	5	1	air	25	0	air			790	60	air	25	0	air	25	0	air	25	5	5	0.00067	1202	21.2
92.1	6.1	0.2	1.6	0	0	0	0	0	0	0	0	0	0	0	0	0	1150	87	4	1	air	25	0	air			600	60	water	25	0	air	200	20	air	50	12.5	4	0.001	901	24.1
92.1	6.1	0.2	1.6	0	0	0	0	0	0	0	0	0	0	0	0	0	1150	87	4	1	air	25	0	air			625	60	water	25	0	air	200	20	air	50	12.5	4	0.001	1037.8	42.2
92.1	6.1	0.2	1.6	0	0	0	0	0	0	0	0	0	0	0	0	0	1150	87	4	1	air	25	0	air			650	60	water	25	0	air	200	20	air	50	12.5	4	0.001	1154	29.2
92.1	6.1	0.2	1.6	0	0	0	0	0	0	0	0	0	0	0	0	0	1150	87	4	1	air	25	0	air			670	60	water	25	0	air	200	20	air	50	12.5	4	0.001	1181	17.8
92.1	6.1	0.2	1.6	0	0	0	0	0	0	0	0	0	0	0	0	0	1150	87	4	1	air	25	0	air			670	60	water	25	0	air	200	20	air	50	12.5	4	0.001	1232	16.8
86.63	11.2	0.22	1.95	0	0	0	0	0	0	0	0	0	0	0	0	0	1150	87	4	1	air	25	0	air			600	60	water	25	0	air	200	20	air	50	12.5	4	0.001	1368	22
86.63	11.2	0.22	1.95	0	0	0	0	0	0	0	0	0	0	0	0	0	1150	87	4	1	air	25	0	air			650	60	water	25	0	air	200	20	air	50	12.5	4	0.001	1400	32
86.63	11.2	0.22	1.95	0	0	0	0	0	0	0	0	0	0	0	0	0	1150	87	4	1	air	25	0	air			700	60	water	25	0	air	200	20	air	50	12.5	4	0.001	1450	24.4
86.63	11.2	0.22	1.95	0	0	0	0	0	0	0	0	0	0	0	0	0	1150	87	4	1	air	25	0	air			750	60	water	25	0	air	200	20	air	50	12.5	4	0.001	1427	24.1
86.63	11.2	0.22	1.95	0	0	0	0	0	0	0	0	0	0	0	0	0	1150	87	4	1	air	25	0	air			800	60	water	25	0	air	200	20	air	50	12.5	4	0.001	1422	22.5
86.63	11.2	0.22	1.95	0	0	0	0	0	0	0	0	0	0	0	0	0	1150	87	4	1	air	25	0	air			850	60	water	25	0	air	200	20	air	50	12.5	4	0.001	1391	22.8
84.99	11.02	0.18	3.81	0	0	0	0	0	0	0	0	0	0	0	0	0	1150	87	4	1	air	25	0	air			700	60	water	25	0	air	200	20	air	50	12.5	4	0.001	735	36.5
84.99	11.02	0.18	3.81	0	0	0	0	0	0	0	0	0	0	0	0	0	1150	87	4	1	air	25	0	air			750	60	water	25	0	air	200	20	air	50	12.5	4	0.001	992	40
84.99	11.02	0.18	3.81	0	0	0	0	0	0	0	0	0	0	0	0	0	1150	87	4	1	air	25	0	air			800	60	water	25	0	air	200	20	air	50	12.5	4	0.001	1100	35
84.99	11.02	0.18	3.81	0	0	0	0	0	0	0	0	0	0	0	0	0	1150	87	4	1	air	25	0	air			850	60	water	25	0	air	200	20	air	50	12.5	4	0.001	1200	20
84.99	11.02	0.18	3.81	0	0	0	0	0	0	0	0	0	0	0	0	0	1150	87	4	1	air	25	0	air			900	60	water	25	0	air	200	20	air	50	12.5	4	0.001	1194	19.4
82.96	10.75	0.21	6.08	0	0	0	0	0	0	0	0	0	0	0	0	0	1150	87	4	1	air	25	0	air			650	60	water	25	0	air	200	20	air	50	12.5	4	0.001	644	65
82.96	10.75	0.21	6.08	0	0	0	0	0	0	0	0	0	0	0	0	0	1150	87	4	1	air	25	0	air			750	60	water	25	0	air	200	20	air	50	12.5	4	0.001	635	62.7
82.96	10.75	0.21	6.08	0	0	0	0	0	0	0	0	0	0	0	0	0	1150	87	4	1	air	25	0	air			850	60	water	25	0	air	200	20	air	50	12.5	4	0.001	621	55.8
82.96	10.75	0.21	6.08	0	0	0	0	0	0	0	0	0	0	0	0	0	1150	87	4	1	air	25	0	air			950	60	water	25	0	air	200	20	air	50	12.5	4	0.001	600	38.4
82.96	10.75	0.21	6.08	0	0	0	0	0	0	0	0	0	0	0	0	0	1150	87	4	1	air	25	0	air			1000	60	water	25	0	air	200	20	air	50	12.5	4	0.001	608	37
90.18	7.2	0.22	2.4	0	0	0	0	0	0	0	0	0	0	0	0	0	1150	91	3.8	1	air	700	30	air	70	1.1	700	60	air	25	0	air	25	0	air	50	12.5	1.1	0.00067	995	66.1
89.94	6.4	0.18	2.8	0.5	0	0	0	0	0	0	0	0	0.1	0.075	0.005	0	1150	93	4	1	air	25	0	air			740	10	air	25	0	air	25	0	air	50	12.5	4	0.00067	752	52.7
79.61	19.74	0.46	0.005	0.17	0	0	0	0	0	0	0	0	0	0.005	0.005	0.005	1100	90	4	1	furnace	25	0	air	60	1.6	750	10	air	25	0	air	25	0	air	25	6	1.6	0.001	1023.1	48
77.1043	22.28	0.42	0.005	0.18	0	0	0	0	0	0	0	0	0	0.004	0.003	0.0037	1100	90	4	1	furnace	25	0	air	60	1.6	750	10	air	25	0	air	25	0	air	25	6	1.6	0.001	985.3	68
79.1207	20.08	0.61	0.005	0.17	0	0	0	0	0	0	0	0	0	0.005	0.004	0.0053	1100	90	4	1	furnace	25	0	air	60	1.6	750	10	air	25	0	air	25	0	air	25	6	1.6	0.001	1101.8	57.2
75.4216	23.77	0.6	0.005	0.19	0	0	0	0	0	0	0	0	0	0.005	0.004	0.0044	1100	90	4	1	furnace	25	0	air	60	1.6	750	10	air	25	0	air	25	0	air	25	6	1.6	0.001	1026.1	66.4
77.111	22.18	0.52	0.004	0.17	0	0	0	0	0	0	0	0	0	0.005	0.005	0.005	1100	87	4	1	furnace	25	0	air	60	1.6	650	5	air	25	0	air	25	0	air	25	6	1.6	0.001	988.48	58.28
77.111	22.18	0.52	0.004	0.17	0	0	0	0	0	0	0	0	0	0.005	0.005	0.005	1100	87	4	1	furnace	25	0	air	60	1.6	650	10	air	25	0	air	25	0	air	25	6	1.6	0.001	1043.91	65.41
77.111	22.18	0.52	0.004	0.17	0	0	0	0	0	0	0	0	0	0.005	0.005	0.005	1100	87	4	1	furnace	25	0	air	60	1.6	650	15	air	25	0	air	25	0	air	25	6	1.6	0.001	1033.82	67.57
77.111	22.18	0.52	0.004	0.17	0	0	0	0	0	0	0	0	0	0.005	0.005	0.005	1100	87	4	1	furnace	25	0	air	60	1.6	650	20	air	25	0	air	25	0	air	25	6	1.6	0.001	1050.44	65.02
77.111	22.18	0.52	0.004	0.17	0	0	0	0	0	0	0	0	0	0.005	0.005	0.005	1100	87	4	1	furnace	25	0	air	60	1.6	750	5	air	25	0	air	25	0	air	25	6	1.6	0.001	1036.57	58.15
77.111	22.18	0.52	0.004	0.17	0	0	0	0	0	0	0	0	0	0.005	0.005	0.005	1100	87	4	1	furnace	25	0	air	60	1.6	750	10	air	25	0	air	25	0	air	25	6	1.6	0.001	1007.2	60.81
77.111	22.18	0.52	0.004	0.17	0	0	0	0	0	0	0	0	0	0.005	0.005	0.005	1100	87	4	1	furnace	25	0	air	60	1.6	750	15	air	25	0	air	25	0	air	25	6	1.6	0.001	1037.35	63.5
77.111	22.18	0.52	0.004	0.17	0	0	0	0	0	0	0	0	0	0.005	0.005	0.005	1100	87	4	1	furnace	25	0	air	60	1.6	750	20	air	25	0	air	25	0	air	25	6	1.6	0.001	1033.91	69.7
77.111	22.18	0.52	0.004	0.17	0	0	0	0	0	0	0	0	0	0.005	0.005	0.005	1100	87	4	1	furnace	25	0	air	60	1.6	850	5	air	25	0	air	25	0	air	25	6	1.6	0.001	907.54	75.06
77.111	22.18	0.52	0.004	0.17	0	0	0	0	0	0	0	0	0	0.005	0.005	0.005	1100	87	4	1	furnace	25	0	air	60	1.6	850	10	air	25	0	air	25	0	air	25	6	1.6	0.001	900.5	75.52
77.111	22.18	0.52	0.004	0.17	0	0	0	0	0	0	0	0	0	0.005	0.005	0.005	1100	87	4	1	furnace	25	0	air	60	1.6	850	15	air	25	0	air	25	0	air	25	6	1.6	0.001	911.58	65.13
77.111	22.18	0.52	0.004	0.17	0	0	0	0	0	0	0	0	0	0.005	0.005	0.005	1100	87	4	1	furnace	25	0	air	60	1.6	850	20	air	25	0	air	25	0	air	25	6	1.6	0.001	905.47	66.17
77.111	22.18	0.52	0.004	0.17	0	0	0	0	0	0	0	0	0	0.005	0.005	0.005	1100	87	4	1	furnace	25	0	air	60	1.6	950	5	air	25	0	air	25	0	air	25	6	1.6	0.001	953.69	69.05
77.111	22.18	0.52	0.004	0.17	0	0	0	0	0	0	0	0	0	0.005	0.005	0.005	1100	87	4	1	furnace	25	0	air	60	1.6	950	10	air	25	0	air	25	0	air	25	6	1.6	0.001	897.03	74.04
77.111	22.18	0.52	0.004	0.17	0	0	0	0	0	0	0	0	0	0.005	0.005	0.005	1100	87	4	1	furnace	25	0	air	60	1.6	950	15	air	25	0	air	25	0	air	25	6	1.6	0.001	904.35	63.79
77.111	22.18	0.52	0.004	0.17	0	0	0	0	0	0	0	0	0	0.005	0.005	0.005	1100	87	4	1	furnace	25	0	air	60	1.6	950	20	air	25	0	air	25	0	air	25	6	1.6	0.001	896.94	74.12
69.1838	26.4	0.32	2.74	0.209	1.13	0	0	0	0	0	0	0	0	0.0043	0.0019	0.011	1100	80.5	6	1	air	1100	60	air	83.3	1	700	20	water	25	0	air	25	0	air	25	6	1	0.001	678.5	33.8
68.3682	25.9	0.33	2.83	0.203	2.35	0	0	0	0	0	0	0	0	0.0042	0.0016	0.013	1100	80.5	6	1	air	1100	60	air	83.3	1	700	20	water	25	0	air	25	0	air	25	6	1	0.001	690	33.4
66.8757	25.8	0.33	2.83	0.197	3.95	0	0	0	0	0	0	0	0	0.0045	0.0008	0.012	1100	80.5	6	1	air	1100	60	air	83.3	1	700	20	water	25	0	air	25	0	air	25	12.5	1	0.002	760	29.8
80.48	12	0.5	7	0	0	0	0	0	0	0	0	0	0	0.01	0.01	0	1100	95.3	2.8	1	furnace	700	60	air	50	1.4	730	1	air	25	0	air	25	0	air	25	6	1	0.001	1062	18.6
80.48	12	0.5	7	0	0	0	0	0	0	0	0	0	0	0.01	0.01	0	1100	95.3	2.8	1	furnace	700	60	air	50	1.4	830	1	air	25	0	air	25	0	air	25	6	1	0.001	910	31.1
80.48	12	0.5	7	0	0	0	0	0	0	0	0	0	0	0.01	0.01	0	1100	95.3	2.8	1	furnace	700	60	air	50	1.4	930	1	air	25	0	air	25	0	air	25	6	1	0.001	861	35.8
86.3	7.55	0.15	6	0	0	0	0	0	0	0	0	0	0	0	0	0	1050	92.5	3	1	air	25	0	air			900	60	water	25	0	air	25	0	air	50	5	3	0.0003	846	32
86.23	7.81	0.16	5.6	0	0	0	0	0	0	0.2	0	0	0	0	0	0	1050	92.5	3	1	air	25	0	air			900	60	water	25	0	air	25	0	air	50	5	3	0.0003	940	36
92.172	7.22	0.093	0.013	0.49	0	0	0	0	0	0	0	0	0	0.005	0.007	0	1100		3	1	air	25	0	air			25	0	air	25	0	air	25	0	air	25	6	1.25	0.0001	1227	24.3
92.172	7.22	0.093	0.013	0.49	0	0	0	0	0	0	0	0	0	0.005	0.007	0	1100		3	1	air	25	0	air	55	1.45	640	30	air	25	0	air	25	0	air	25	6	1.25	0.0001	1397	21.8
79.2	10.4	0.7	9.7	0	0	0	0	0	0	0	0	0	0	0	0	0	1200	92.5	3	1	water	300	0.1	air			700	60	water	25	0	air	25	0	air	50	12.5	3	0.0003	971	4.8
79.2	10.4	0.7	9.7	0	0	0	0	0	0	0	0	0	0	0	0	0	1200	92.5	3	1	water	300	0.1	air			800	60	water	25	0	air	25	0	air	50	12.5	3	0.0003	877	7.8
79.2	10.4	0.7	9.7	0	0	0	0	0	0	0	0	0	0	0	0	0	1200	92.5	3	1	water	300	0.1	air			850	60	water	25	0	air	25	0	air	50	12.5	3	0.0003	879	21.7
79.2	10.4	0.7	9.7	0	0	0	0	0	0	0	0	0	0	0	0	0	1200	92.5	3	1	water	300	0.1	air			900	60	water	25	0	air	25	0	air	50	12.5	3	0.0003	855	36.6
79.2	10.4	0.7	9.7	0	0	0	0	0	0	0	0	0	0	0	0	0	1200	92.5	3	1	water	300	0.1	air			950	60	water	25	0	air	25	0	air	50	12.5	3	0.0003	804	26.6
79.2	10.4	0.7	9.7	0	0	0	0	0	0	0	0	0	0	0	0	0	1200	92.5	3	1	water	300	0.1	air			1000	60	water	25	0	air	25	0	air	50	12.5	3	0.0003	763	16.2
79.2	10.4	0.7	9.7	0	0	0	0	0	0	0	0	0	0	0	0	0	1200	92.5	3	1	water	300	0.1	air			1100	60	water	25	0	air	25	0	air	50	12.5	3	0.0003	671	12
79.2	10.4	0.7	9.7	0	0	0	0	0	0	0	0	0	0	0	0	0	1200	92.5	3	1	water	300	0.1	air			1200	60	water	25	0	air	25	0	air	50	12.5	3	0.0003	611	4.8
86.63	11.2	0.22	1.95	0	0	0	0	0	0	0	0	0	0	0	0	0	1150	86.6	4	1	air	25	0	air			650	60	water	25	0	air	200	20	air	50	12.5	4	0.001	1407	31.4
91.38	6.6	0.17	1.1	0	0	0	0	0.22	0	0.5	0	0	0	0	0	0.03	1200		6	1	oil	25	0	air	75	1.5	660	30	air	25	0	air	25	0	air	25	6	1	0.0004	1472	26.3
91.38	6.6	0.17	1.1	0	0	0	0	0.22	0	0.5	0	0	0	0	0	0.03	1200		6	1	oil	25	0	air	75	1.5	660	30	air	25	0	air	25	0	air	25	6	1	0.02	1295	22.2
91.38	6.6	0.17	1.1	0	0	0	0	0.22	0	0.5	0	0	0	0	0	0.03	1200		6	1	oil	25	0	air	75	1.5	660	30	air	25	0	air	25	0	air	25	6	1	0.1	1295	20.1
91.38	6.6	0.17	1.1	0	0	0	0	0.22	0	0.5	0	0	0	0	0	0.03	1200		6	1	oil	25	0	air	75	1.5	660	360	air	25	0	air	25	0	air	25	6	1	0.0004	1022	35.1
91.38	6.6	0.17	1.1	0	0	0	0	0.22	0	0.5	0	0	0	0	0	0.03	1200		6	1	oil	25	0	air	75	1.5	660	360	air	25	0	air	25	0	air	25	6	1	0.02	936	31
91.38	6.6	0.17	1.1	0	0	0	0	0.22	0	0.5	0	0	0	0	0	0.03	1200		6	1	oil	25	0	air	75	1.5	660	360	air	25	0	air	25	0	air	25	6	1	0.1	910	25.7
94.84	0.62	0.18	4.06	0	0	0	0	0	0	0.3	0	0	0	0	0	0	1250	87	4	1	air	25	0	air			25	0	air	25	0	air	25	0	air	50	12.5	4	0.001	1150	40
94.84	0.62	0.18	4.06	0	0	0	0	0	0	0.3	0	0	0	0	0	0	1250	87	4	1	air	25	0	air			775	60	water	25	0	air	300	60	air	50	12.5	4	0.001	1050	41
94.84	0.62	0.18	4.06	0	0	0	0	0	0	0.3	0	0	0	0	0	0	1250	87	4	1	air	25	0	air			775	60	water	25	0	air	400	60	air	50	12.5	4	0.001	1000	48
94.84	0.62	0.18	4.06	0	0	0	0	0	0	0.3	0	0	0	0	0	0	1250	87	4	1	air	25	0	air			775	60	water	25	0	air	500	60	air	50	12.5	4	0.001	950	50
94.84	0.62	0.18	4.06	0	0	0	0	0	0	0.3	0	0	0	0	0	0	1250	87	4	1	air	25	0	air			775	60	water	25	0	air	600	60	air	50	12.5	4	0.001	850	55
90.71	5.9	0.19	3.2	0	0	0	0	0	0	0	0	0	0	0	0	0	1150	87	4	1	air	25	0	air			700	60	water	25	0	air	200	20	air	50	12.5	4	0.001	942	35.4
88.33	8.37	0.19	3.11	0	0	0	0	0	0	0	0	0	0	0	0	0	1150	87	4	1	air	25	0	air			750	60	water	25	0	air	200	20	air	50	12.5	4	0.001	1112	39.3
89.62	8.6	0.2	1.58	0	0	0	0	0	0	0	0	0	0	0	0	0	1150	87	4	1	air	25	0	air			650	60	water	25	0	air	200	20	air	50	12.5	4	0.001	1373	31.8
81.17	18.18	0.625	0.025	0	0	0	0	0	0	0	0	0	0	0	0	0	1200		2.5	1	air	25	0	air	50	1.25	800	1.4	air	25	0	air	25	0	air	50	12.5	1.25	0.001	1105.6	60
79.676	18.18	0.624	1.52	0	0	0	0	0	0	0	0	0	0	0	0	0	1200		2.5	1	air	25	0	air	50	1.25	800	1.4	air	25	0	air	25	0	air	50	12.5	1.25	0.001	960.1	59.3
77.382	18.99	0.628	3	0	0	0	0	0	0	0	0	0	0	0	0	0	1200		2.5	1	air	25	0	air	50	1.25	800	1.4	air	25	0	air	25	0	air	50	12.5	1.25	0.001	848.9	49.7
84.13	15.23	0.613	0.027	0	0	0	0	0	0	0	0	0	0	0	0	0	1200		2.5	1	air	25	0	air	50	1.25	800	1.4	air	25	0	air	25	0	air	50	12.5	1.25	0.001	1124.1	51.3
82.898	14.97	0.592	1.54	0	0	0	0	0	0	0	0	0	0	0	0	0	1200		2.5	1	air	25	0	air	50	1.25	800	1.4	air	25	0	air	25	0	air	50	12.5	1.25	0.001	976	57.6
81.869	15.47	0.621	2.04	0	0	0	0	0	0	0	0	0	0	0	0	0	1200		2.5	1	air	25	0	air	50	1.25	800	1.4	air	25	0	air	25	0	air	50	12.5	1.25	0.001	938.9	58.4
87.367	12	0.619	0.014	0	0	0	0	0	0	0	0	0	0	0	0	0	1200		2.5	1	air	25	0	air	50	1.25	800	1.4	air	25	0	air	25	0	air	50	12.5	1.25	0.001	837.8	16.1
86.087	11.82	0.623	1.47	0	0	0	0	0	0	0	0	0	0	0	0	0	1200		2.5	1	air	25	0	air	50	1.25	800	1.4	air	25	0	air	25	0	air	50	12.5	1.25	0.001	899.5	30.3
84.721	12.65	0.629	2	0	0	0	0	0	0	0	0	0	0	0	0	0	1200		2.5	1	air	25	0	air	50	1.25	800	1.4	air	25	0	air	25	0	air	50	12.5	1.25	0.001	914.6	40.7
84.84	10.62	0.18	4.06	0	0	0	0	0	0	0.3	0	0	0	0	0	0	1200	87	4	1	air	25	0	air	75	1	750	5	water	25	0	air	25	0	air	25	12.5	1	0.002	968.3	56.8
90.71	5.9	0.19	3.2	0	0	0	0	0	0	0	0	0	0	0	0	0	1150	86.7	4	1	air	25	0	air			650	60	water	25	0	air	200	20	air	50	12.5	4	0.001	816	18.2
90.71	5.9	0.19	3.2	0	0	0	0	0	0	0	0	0	0	0	0	0	1150	86.7	4	1	air	25	0	air			700	60	water	25	0	air	200	20	air	50	12.5	4	0.001	940	35.4
90.71	5.9	0.19	3.2	0	0	0	0	0	0	0	0	0	0	0	0	0	1150	86.7	4	1	air	25	0	air			750	60	water	25	0	air	200	20	air	50	12.5	4	0.001	1114	16.8
90.71	5.9	0.19	3.2	0	0	0	0	0	0	0	0	0	0	0	0	0	1150	86.7	4	1	air	25	0	air			800	60	water	25	0	air	200	20	air	50	12.5	4	0.001	1228	15.2
90.71	5.9	0.19	3.2	0	0	0	0	0	0	0	0	0	0	0	0	0	1150	86.7	4	1	air	25	0	air			850	60	water	25	0	air	200	20	air	50	12.5	4	0.001	1280	13
88.33	8.37	0.19	3.11	0	0	0	0	0	0	0	0	0	0	0	0	0	1150	86.7	4	1	air	25	0	air			650	60	water	25	0	air	200	20	air	50	12.5	4	0.001	908	20.8
88.33	8.37	0.19	3.11	0	0	0	0	0	0	0	0	0	0	0	0	0	1150	86.7	4	1	air	25	0	air			700	60	water	25	0	air	200	20	air	50	12.5	4	0.001	962	23.8
88.33	8.37	0.19	3.11	0	0	0	0	0	0	0	0	0	0	0	0	0	1150	86.7	4	1	air	25	0	air			750	60	water	25	0	air	200	20	air	50	12.5	4	0.001	1003	35
88.33	8.37	0.19	3.11	0	0	0	0	0	0	0	0	0	0	0	0	0	1150	86.7	4	1	air	25	0	air			800	60	water	25	0	air	200	20	air	50	12.5	4	0.001	1112	39.2
88.33	8.37	0.19	3.11	0	0	0	0	0	0	0	0	0	0	0	0	0	1150	86.7	4	1	air	25	0	air			850	60	water	25	0	air	200	20	air	50	12.5	4	0.001	1208	12.5
86.63	11.2	0.22	1.95	0	0	0	0	0	0	0	0	0	0	0	0	0	1150	86.7	4	1	air	25	0	air			600	60	water	25	0	air	200	20	air	50	12.5	4	0.001	1365	22.5
86.63	11.2	0.22	1.95	0	0	0	0	0	0	0	0	0	0	0	0	0	1150	86.7	4	1	air	25	0	air			650	60	water	25	0	air	200	20	air	50	12.5	4	0.001	1402	31.2
86.63	11.2	0.22	1.95	0	0	0	0	0	0	0	0	0	0	0	0	0	1150	86.7	4	1	air	25	0	air			700	60	water	25	0	air	200	20	air	50	12.5	4	0.001	1453	23.8
86.63	11.2	0.22	1.95	0	0	0	0	0	0	0	0	0	0	0	0	0	1150	86.7	4	1	air	25	0	air			750	60	water	25	0	air	200	20	air	50	12.5	4	0.001	1423	22.6
86.63	11.2	0.22	1.95	0	0	0	0	0	0	0	0	0	0	0	0	0	1150	86.7	4	1	air	25	0	air			800	60	water	25	0	air	200	20	air	50	12.5	4	0.001	1416	21
86.63	11.2	0.22	1.95	0	0	0	0	0	0	0	0	0	0	0	0	0	1150	86.7	4	1	air	25	0	air			850	60	water	25	0	air	200	20	air	50	12.5	4	0.001	1384	21.3
84.99	11.02	0.18	3.81	0	0	0	0	0	0	0	0	0	0	0	0	0	1150	86.7	4	1	air	25	0	air			700	60	water	25	0	air	200	20	air	50	12.5	4	0.001	728	37.3
84.99	11.02	0.18	3.81	0	0	0	0	0	0	0	0	0	0	0	0	0	1150	86.7	4	1	air	25	0	air			750	60	water	25	0	air	200	20	air	50	12.5	4	0.001	892	39.2
84.99	11.02	0.18	3.81	0	0	0	0	0	0	0	0	0	0	0	0	0	1150	86.7	4	1	air	25	0	air			800	60	water	25	0	air	200	20	air	50	12.5	4	0.001	1090	35
84.99	11.02	0.18	3.81	0	0	0	0	0	0	0	0	0	0	0	0	0	1150	86.7	4	1	air	25	0	air			850	60	water	25	0	air	200	20	air	50	12.5	4	0.001	1201	19.4
84.99	11.02	0.18	3.81	0	0	0	0	0	0	0	0	0	0	0	0	0	1150	86.7	4	1	air	25	0	air			900	60	water	25	0	air	200	20	air	50	12.5	4	0.001	1195	18.8
82.96	10.75	0.21	6.08	0	0	0	0	0	0	0	0	0	0	0	0	0	1150	86.7	4	1	air	25	0	air			650	60	water	25	0	air	200	20	air	50	12.5	4	0.001	668	65
82.96	10.75	0.21	6.08	0	0	0	0	0	0	0	0	0	0	0	0	0	1150	86.7	4	1	air	25	0	air			750	60	water	25	0	air	200	20	air	50	12.5	4	0.001	660	63.8
82.96	10.75	0.21	6.08	0	0	0	0	0	0	0	0	0	0	0	0	0	1150	86.7	4	1	air	25	0	air			850	60	water	25	0	air	200	20	air	50	12.5	4	0.001	634	56
82.96	10.75	0.21	6.08	0	0	0	0	0	0	0	0	0	0	0	0	0	1150	86.7	4	1	air	25	0	air			950	60	water	25	0	air	200	20	air	50	12.5	4	0.001	600	37.5
82.96	10.75	0.21	6.08	0	0	0	0	0	0	0	0	0	0	0	0	0	1150	86.7	4	1	air	25	0	air			1000	60	water	25	0	air	200	20	air	50	12.5	4	0.001	603	37.8
65	26	1	8	0	0	0	0	0	0	0	0	0	0	0	0	0	1050		3	1	air	1100	60	air	50	1.5	1000	15	water	25	0	air	25	0	air	25	10	1.5	0.00133	765	66
63	26	1	10	0	0	0	0	0	0	0	0	0	0	0	0	0	1050		3	1	air	1100	60	air	50	1.5	1000	15	water	25	0	air	25	0	air	25	10	1.5	0.00133	820	72
92.1	6.1	0.2	1.6	0	0	0	0	0	0	0	0	0	0	0	0	0	1150	87	4	1	air	25	0	air			630	60	water	25	0	air	200	20	air	50	12.5	4	0.001	1040	40.8
90.72	5.9	0.18	3.2	0	0	0	0	0	0	0	0	0	0	0	0	0	1150	87	4	1	air	25	0	air			700	60	water	25	0	air	200	20	air	50	12.5	4	0.001	942	35.4
71.65	18.1	0.65	9.6	0	0	0	0	0	0	0	0	0	0	0	0	0	1060	90	3.5	1	air	250	0.1	water			25	0	air	25	0	air	25	0	air	50	12.5	3.5	0.001	1003.3	24.6
71.65	18.1	0.65	9.6	0	0	0	0	0	0	0	0	0	0	0	0	0	1060	90	3.5	1	air	250	0.1	water			900	60	water	25	0	air	25	0	air	50	12.5	3.5	0.001	820	40
71.65	18.1	0.65	9.6	0	0	0	0	0	0	0	0	0	0	0	0	0	1060	90	3.5	1	air	250	0.1	water			1000	30	water	25	0	air	25	0	air	50	12.5	3.5	0.001	792	35.1
67.687	25.9	0.33	2.83	0.27	2.96	0	0	0	0	0	0	0	0	0.005	0.008	0.01	1100	82.8	6	1	air	1000	60	air	83.3	1	700	20	water	25	0	air	25	0	air	25	12.5	1	0.002	725	33.2
67.687	25.9	0.33	2.83	0.27	2.96	0	0	0	0	0	0	0	0	0.005	0.008	0.01	1100	82.8	6	1	air	1000	60	air	83.3	1	800	20	water	25	0	air	25	0	air	25	12.5	1	0.002	629.3	44.3
67.687	25.9	0.33	2.83	0.27	2.96	0	0	0	0	0	0	0	0	0.005	0.008	0.01	1100	82.8	6	1	air	1000	60	air	83.3	1	900	20	water	25	0	air	25	0	air	25	12.5	1	0.002	568.3	46.5
67.687	25.9	0.33	2.83	0.27	2.96	0	0	0	0	0	0	0	0	0.005	0.008	0.01	1100	82.8	6	1	air	1000	60	air	83.3	1	1000	20	water	25	0	air	25	0	air	25	12.5	1	0.002	523	54.2
72.1244	24.87	0.017	2.97	0	0	0	0	0	0	0	0	0	0	0.01	0.0086	0	1100	74	15	1	air	25	0	air			1050	60	water	25	0	air	25	0	air	40	5	2	0.001	680	87.5
68.8113	25.08	0.019	3.05	3.02	0	0	0	0	0	0	0	0	0	0.011	0.0087	0	1100	74	15	1	air	25	0	air			1050	60	water	25	0	air	25	0	air	40	5	2	0.001	475	62
83.34	10.1	0.26	6.3	0	0	0	0	0	0	0	0	0	0	0	0	0	1000		3	1	air	25	0	air			700	10	air	25	0	air	25	0	air	25	6	3	0.0001	808	43
83.34	10.1	0.26	6.3	0	0	0	0	0	0	0	0	0	0	0	0	0	1000		3	1	air	25	0	air			800	10	air	25	0	air	25	0	air	25	6	3	0.0001	786	47
83.34	10.1	0.26	6.3	0	0	0	0	0	0	0	0	0	0	0	0	0	1000		3	1	air	25	0	air			900	10	air	25	0	air	25	0	air	25	6	3	0.0001	761	48
83.34	10.1	0.26	6.3	0	0	0	0	0	0	0	0	0	0	0	0	0	1000		3	1	air	25	0	air			1000	10	air	25	0	air	25	0	air	25	6	3	0.0001	656	35
85.02	11	0.18	3.8	0	0	0	0	0	0	0	0	0	0	0	0	0	1200	87	4	1	air	25	0	air	75	1	770	3	water	25	0	air	25	0	air	25	12.5	1	0.002	1007	65
81.78	12	0.7	5.5	0	0	0	0	0	0	0	0	0	0	0.01	0.01	0	1100		3	2	air	650	60	furnace	66.6	1	640	10	air	25	0	air	25	0	air	25	6	1	0.001	1415	8.2
81.78	12	0.7	5.5	0	0	0	0	0	0	0	0	0	0	0.01	0.01	0	1100		3	2	air	650	60	furnace	66.6	1	670	10	air	25	0	air	25	0	air	25	6	1	0.001	1235	27
81.78	12	0.7	5.5	0	0	0	0	0	0	0	0	0	0	0.01	0.01	0	1100		3	2	air	650	60	furnace	66.6	1	710	10	air	25	0	air	25	0	air	25	6	1	0.001	1058	42.1
81.78	12	0.7	5.5	0	0	0	0	0	0	0	0	0	0	0.01	0.01	0	1100		3	2	air	650	60	furnace	66.6	1	750	10	air	25	0	air	25	0	air	25	6	1	0.001	1003	45.9
80.382	19.1	0.45	0	0.05	0	0	0	0	0	0	0	0	0	0.01	0.003	0.005	1100	81.6	5.5	2	water	450	60	air			25	0	air	25	0	air	25	0	air	25	6	2	0.001	1087	60.8
77.679	21.8	0.45	0	0.05	0	0	0	0	0	0	0	0	0	0.01	0.002	0.009	1100	81.6	5.5	2	water	450	60	air			25	0	air	25	0	air	25	0	air	25	6	2	0.001	997	73.8
78.181	19.3	0.45	2	0.05	0	0	0	0	0	0	0	0	0	0.01	0.002	0.007	1100	81.6	5.5	2	water	450	60	air			25	0	air	25	0	air	25	0	air	25	6	2	0.001	843	70.5
75.869	21.6	0.46	2	0.05	0	0	0	0	0	0	0	0	0	0.01	0	0.011	1100	81.6	5.5	2	water	450	60	air			25	0	air	25	0	air	25	0	air	25	6	2	0.001	828	71.6
89.35	6	0.15	3	1.5	0	0	0	0	0	0	0	0	0	0	0	0	1250	97	3	1	air	25	0	air	66.6	1	720	3	gas	25	0	air	25	0	air	50	12.5	1	0.001	856	25
89.35	6	0.15	3	1.5	0	0	0	0	0	0	0	0	0	0	0	0	1250	97	3	1	air	25	0	air	66.6	1	840	3	gas	25	0	air	25	0	air	50	12.5	1	0.001	929	37
89.2	6	0.3	3	1.5	0	0	0	0	0	0	0	0	0	0	0	0	1250	97	3	1	air	25	0	air	66.6	1	780	3	gas	25	0	air	25	0	air	50	12.5	1	0.001	1131	58
91.88	3	0.1	5	0	0	0	0	0	0	0	0	0	0	0.01	0.01	0	1100	95	3	1	air	650	60	furnace	66.6	1	25	0	air	25	0	air	25	0	air	12.6	6	1	0.001	535.3	20.1
91.68	3	0.3	5	0	0	0	0	0	0	0	0	0	0	0.01	0.01	0	1100	95	3	1	air	650	60	furnace	66.6	1	25	0	air	25	0	air	25	0	air	12.6	6	1	0.001	747.9	14.6
91.48	3	0.5	5	0	0	0	0	0	0	0	0	0	0	0.01	0.01	0	1100	95	3	1	air	650	60	furnace	66.6	1	25	0	air	25	0	air	25	0	air	12.6	6	1	0.001	834.4	14.4
91.28	3	0.7	5	0	0	0	0	0	0	0	0	0	0	0.01	0.01	0	1100	95	3	1	air	650	60	furnace	66.6	1	25	0	air	25	0	air	25	0	air	12.6	6	1	0.001	958.7	12.4
74.903	23.1	0.304	1.5	0.09	0.08	0	0	0	0	0	0	0	0	0.017	0.006	0	1150	80	10	1	air	1150	60	air			25	0	air	25	0	air	25	0	air	16	3	1.5	0.002	660	96
74.903	23.1	0.304	1.5	0.09	0.08	0	0	0	0	0	0	0	0	0.017	0.006	0	1150	80	10	1	air	1150	60	air	20	8	25	0	air	25	0	air	25	0	air	16	3	1.5	0.002	840	34.2
74.903	23.1	0.304	1.5	0.09	0.08	0	0	0	0	0	0	0	0	0.017	0.006	0	1150	80	10	1	air	1150	60	air	40	6	25	0	air	25	0	air	25	0	air	16	3	1.5	0.002	1150	7.3
74.903	23.1	0.304	1.5	0.09	0.08	0	0	0	0	0	0	0	0	0.017	0.006	0	1150	80	10	1	air	1150	60	air	60	4	25	0	air	25	0	air	25	0	air	16	3	1.5	0.002	1400	5.5
74.903	23.1	0.304	1.5	0.09	0.08	0	0	0	0	0	0	0	0	0.017	0.006	0	1150	80	10	1	air	1150	60	air	80	2	25	0	air	25	0	air	25	0	air	16	3	1.5	0.002	1580	3.9
84.32	13.89	0.57	1.22	0	0	0	0	0	0	0	0	0	0	0	0	0	1150	85	3	1	air	25	0	air	53	1.4	870	10	air	25	0	air	25	0	air	25	6	1.4	0.001	1031.4	67.7
71.753	21.5	0.06	3.56	3.11	0	0	0	0	0	0	0	0	0	0.008	0.009	0	1200	50	8	1	air	1040	60	water			25	0	air	25	0	air	25	0	air	25	6	1.2	0.00033	655	53.85
71.753	21.5	0.06	3.56	3.11	0	0	0	0	0	0	0	0	0	0.008	0.009	0	1200	50	8	1	air	1040	60	water	10	7.2	25	0	air	25	0	air	25	0	air	25	6	1.2	0.00033	865	34.17
71.753	21.5	0.06	3.56	3.11	0	0	0	0	0	0	0	0	0	0.008	0.009	0	1200	50	8	1	air	1040	60	water	30	5.6	25	0	air	25	0	air	25	0	air	25	6	1.2	0.00033	926	29.05
71.753	21.5	0.06	3.56	3.11	0	0	0	0	0	0	0	0	0	0.008	0.009	0	1200	50	8	1	air	1040	60	water	50	4	25	0	air	25	0	air	25	0	air	25	6	1.2	0.00033	1202	19.93
58.5	30	2	9.5	0	0	0	0	0	0	0	0	0	0	0	0	0	1150		6.5	1	air	25	0	air			1100	60	water	25	0	air	25	0	air	50	12.5	6	0.00067	1150	53
85.58	8.5	0.3	5.6	0	0	0	0	0	0	0	0	0	0	0.01	0.01	0	1100		3	2	air	650	60	air	66.6	1	900	30	air	25	0	air	25	0	air	25	6	1	0.001	734	77
91.061	8.51	0.05	0.08	0.29	0	0	0	0	0	0	0	0	0	0.0085	0.0005	0	900		3	2	air	600	60	furnace			620	10	air	25	0	air	25	0	air	25	6	1.2	0.0001	1034	27
91.061	8.51	0.05	0.08	0.29	0	0	0	0	0	0	0	0	0	0.0085	0.0005	0	900		3	2	air	600	60	furnace	60	1.2	620	10	air	25	0	air	25	0	air	25	6	1.2	0.0001	1193	25
87.583	4.5	0.017	7.9	0	0	0	0	0	0	0	0	0	0	0	0	0	650	85	3	1	air	850	15	air	66.6	1	750	60	air	25	0	air	25	0	air	12.6	5	1	0.001	592.2	35.9
85.756	4.9	0.094	8.3	0	0	0	0	0	0	0.95	0	0	0	0	0	0	650	85	3	1	air	850	15	air	66.6	1	750	60	air	25	0	air	25	0	air	12.6	5	1	0.001	694.5	30.7
60.2	27	0.8	12	0	0	0	0	0	0	0	0	0	0	0	0	0	1200		10	1	air	1000	60	air	75	2.5	1100	30	water	25	0	air	25	0	air	25.4	6	1.8	0.001	987	38.6
84.99	11.02	0.18	3.81	0	0	0	0	0	0	0	0	0	0	0	0	0	1150	86.7	4	1	air	25	0	air			700	60	water	25	0	air	200	20	air	50	12.5	4	0.001	738	37.2
84.99	11.02	0.18	3.81	0	0	0	0	0	0	0	0	0	0	0	0	0	1150	86.7	4	1	air	25	0	air			750	60	water	25	0	air	200	20	air	50	12.5	4	0.001	883	38.6
84.99	11.02	0.18	3.81	0	0	0	0	0	0	0	0	0	0	0	0	0	1150	86.7	4	1	air	25	0	air			800	60	water	25	0	air	200	20	air	50	12.5	4	0.001	1087	34.2
84.99	11.02	0.18	3.81	0	0	0	0	0	0	0	0	0	0	0	0	0	1150	86.7	4	1	air	25	0	air			850	60	water	25	0	air	200	20	air	50	12.5	4	0.001	1202	20
84.99	11.02	0.18	3.81	0	0	0	0	0	0	0	0	0	0	0	0	0	1150	86.7	4	1	air	25	0	air			900	60	water	25	0	air	200	20	air	50	12.5	4	0.001	1185	18.7
78.57	12.23	0.8	8.4	0	0	0	0	0	0	0	0	0	0	0	0	0	1200		3	1	air	1000	60	air	50	1.5	900	15	air	25	0	air	25	0	air	25	10	1.5	0.00133	920	46.4
84.99	11.02	0.18	3.81	0	0	0	0	0	0	0	0	0	0	0	0	0	1150	86.6	4	1	air	25	0	air			800	60	water	25	0	air	200	20	air	50	12.5	4	0.001	1082	34.6
59.865	26.8	0.81	12.32	0	0	0	0.2	0	0	0	0	0	0	0.002	0.003	0	1200		10	1	air	1000	60	air	75	2.5	1100	30	water	25	0	air	25	0	air	25.4	6	1.8	0.001	955	42
81.3	12.4	0.2	5.2	0.9	0	0	0	0	0	0	0	0	0	0	0	0	1200		3.2	1	air	650	60	air	68.8	1	800	2	gas	25	0	air	25	0	air	25	6	1	0.00133	815	38
81.3	12.4	0.2	5.2	0.9	0	0	0	0	0	0	0	0	0	0	0	0	1200		3.2	1	air	650	60	air	68.8	1	900	2	gas	25	0	air	25	0	air	25	6	1	0.00133	760	45
86.36	8.1	0.23	5.3	0.01	0	0	0	0	0	0	0	0	0	0	0	0	1200		3.2	1	air	650	60	air	68.8	1	800	2	gas	25	0	air	25	0	air	25	6	1	0.00133	793	37
86.36	8.1	0.23	5.3	0.01	0	0	0	0	0	0	0	0	0	0	0	0	1200		3.2	1	air	650	60	air	68.8	1	900	2	gas	25	0	air	25	0	air	25	6	1	0.00133	949	54
70.4	20	0.6	9	0	0	0	0	0	0	0	0	0	0	0	0	0	1200		10	1	air	1000	60	air	75	2.5	800	10	water	25	0	air	25	0	air	25.4	6	2	0.001	978	42
70.4	20	0.6	9	0	0	0	0	0	0	0	0	0	0	0	0	0	1200		10	1	air	1000	60	air	75	2.5	900	10	water	25	0	air	25	0	air	25.4	6	2	0.001	830	44
70.4	20	0.6	9	0	0	0	0	0	0	0	0	0	0	0	0	0	1200		10	1	air	1000	60	air	75	2.5	1000	10	water	25	0	air	25	0	air	25.4	6	2	0.001	806	46
70.4	20	0.6	9	0	0	0	0	0	0	0	0	0	0	0	0	0	1200		10	1	air	1000	60	air	75	2.5	1100	10	water	25	0	air	25	0	air	25.4	6	2	0.001	787	47
68.557	25.45	0.03	2.88	3.06	0	0	0	0	0	0	0	0	0	0.008	0.007	0.008	1100	75	15	1	air	25	0	air			1100	60	water	25	0	air	25	0	air	30	5	2	0.001	670	87.5
60.96	28.15	1.82	9.07	0	0	0	0	0	0	0	0	0	0	0	0	0	1250	70	6	1	air	25	0	air			1200	120	water	25	0	air	25	0	air	50	12	5	0.00067	1080	55.5
69.75	20	0.25	10	0	0	0	0	0	0	0	0	0	0	0	0	0	1200		1.5	1	air	25	0	air			1100	15	water	25	0	air	25	0	air	25	5	1	0.0003	771	10.1
69.5	20	0.5	10	0	0	0	0	0	0	0	0	0	0	0	0	0	1200		1.5	1	air	25	0	air			1100	15	water	25	0	air	25	0	air	25	5	1	0.0003	808	29.4
69	20	1	10	0	0	0	0	0	0	0	0	0	0	0	0	0	1200		1.5	1	air	25	0	air			1100	15	water	25	0	air	25	0	air	25	5	1	0.0003	843	59.1
68.8	20	1.2	10	0	0	0	0	0	0	0	0	0	0	0	0	0	1200		1.5	1	air	25	0	air			1100	15	water	25	0	air	25	0	air	25	5	1	0.0003	881	38.1
68.5	20	1.5	10	0	0	0	0	0	0	0	0	0	0	0	0	0	1200		1.5	1	air	25	0	air			1100	15	water	25	0	air	25	0	air	25	5	1	0.0003	1092	17.1
68	20	1	11	0	0	0	0	0	0	0	0	0	0	0	0	0	1200		1.5	1	air	25	0	air			1100	15	water	25	0	air	25	0	air	25	5	1	0.0003	946	35.7
63.5	20	1.5	10	0	5	0	0	0	0	0	0	0	0	0	0	0	1200		1.5	1	air	25	0	air			1100	15	water	25	0	air	25	0	air	25	5	1	0.0003	934	65.6
62.2	20	1.8	11	0	5	0	0	0	0	0	0	0	0	0	0	0	1200		1.5	1	air	25	0	air			1100	15	water	25	0	air	25	0	air	25	5	1	0.0003	1192	29
62	20	1	12	0	5	0	0	0	0	0	0	0	0	0	0	0	1200		1.5	1	air	25	0	air			1100	15	water	25	0	air	25	0	air	25	5	1	0.0003	1000	32.2
61	20	1	13	0	5	0	0	0	0	0	0	0	0	0	0	0	1200		1.5	1	air	25	0	air			1100	15	water	25	0	air	25	0	air	25	5	1	0.0003	1136	28.6
60.7	20	1.3	13	0	5	0	0	0	0	0	0	0	0	0	0	0	1200		1.5	1	air	25	0	air			1100	15	water	25	0	air	25	0	air	25	5	1	0.0003	1140	22.2
59.5	30	2	8.5	0	0	0	0	0	0	0	0	0	0	0	0	0	1250		6	1	air	25	0	air			1200	120	water	25	0	air	25	0	air	50	12.5	5	0.0005	1105	54.5
61	28.1	1.8	9.1	0	0	0	0	0	0	0	0	0	0	0	0	0	1250		6	1	air	25	0	air			1200	120	water	25	0	air	25	0	air	50	12	5	0.0005	1080	55.5
57.9	28.1	1.8	9.1	0	3.1	0	0	0	0	0	0	0	0	0	0	0	1250		6	1	air	25	0	air			1200	120	water	25	0	air	25	0	air	50	12	5	0.0005	1092	47.2
56	28.1	1.8	9.1	0	5	0	0	0	0	0	0	0	0	0	0	0	1250		6	1	air	25	0	air			1200	120	water	25	0	air	25	0	air	50	12	5	0.0005	1102	39.1
54.9	28.1	1.8	9.1	0	6.1	0	0	0	0	0	0	0	0	0	0	0	1250		6	1	air	25	0	air			1200	120	water	25	0	air	25	0	air	50	12	5	0.0005	1122	36.5
52.8	28.1	1.8	9.1	0	8.2	0	0	0	0	0	0	0	0	0	0	0	1250		6	1	air	25	0	air			1200	120	water	25	0	air	25	0	air	50	12	5	0.0005	984	22.6
92.41	5.25	0.19	1.56	0.59	0	0	0	0	0	0	0	0	0	0	0	0	1200		3	1	air	25	0	air	53	1.4	730	3	air	25	0	air	25	0	air	25	6.5	1.4	0.00067	1041	42
92.99	6	0.06	0.95	0	0	0	0	0	0	0	0	0	0	0	0	0	1150	92	2.5	1	air	25	0	air	60	1	600	60	air	25	0	air	25	0	air	25	6	1	0.001	847	23.2
93.03	5.92	0.15	0.9	0	0	0	0	0	0	0	0	0	0	0	0	0	1150	92	2.5	1	air	25	0	air	60	1	600	60	air	25	0	air	25	0	air	25	6	1	0.001	873	28.7
92.9	5.9	0.3	0.9	0	0	0	0	0	0	0	0	0	0	0	0	0	1150	92	2.5	1	air	25	0	air	60	1	600	60	air	25	0	air	25	0	air	25	6	1	0.001	901	32.4
92.99	6	0.06	0.95	0	0	0	0	0	0	0	0	0	0	0	0	0	1150	92	2.5	1	air	25	0	air	60	1	630	60	air	25	0	air	25	0	air	25	6	1	0.001	852	28.3
93.03	5.92	0.15	0.9	0	0	0	0	0	0	0	0	0	0	0	0	0	1150	92	2.5	1	air	25	0	air	60	1	630	60	air	25	0	air	25	0	air	25	6	1	0.001	924	32.3
92.9	5.9	0.3	0.9	0	0	0	0	0	0	0	0	0	0	0	0	0	1150	92	2.5	1	air	25	0	air	60	1	630	60	air	25	0	air	25	0	air	25	6	1	0.001	943	50
92.99	6	0.06	0.95	0	0	0	0	0	0	0	0	0	0	0	0	0	1150	92	2.5	1	air	25	0	air	60	1	630	60	air	25	0	air	25	0	air	25	6	1	0.001	866	32.3
93.03	5.92	0.15	0.9	0	0	0	0	0	0	0	0	0	0	0	0	0	1150	92	2.5	1	air	25	0	air	60	1	630	60	air	25	0	air	25	0	air	25	6	1	0.001	945	38.2
92.9	5.9	0.3	0.9	0	0	0	0	0	0	0	0	0	0	0	0	0	1150	92	2.5	1	air	25	0	air	60	1	630	60	air	25	0	air	25	0	air	25	6	1	0.001	1124	45.7
92.1383	7.66	0.19	0	0	0	0	0	0	0	0	0	0	0	0.0045	0.0072	0	1150	87	4	1	air	625	60	water	63	1.5	625	10	air	25	0	air	25	0	air	25	6	1.5	0.002	1220	44
89.0758	7.93	0.19	2.79	0	0	0	0	0	0	0	0	0	0	0.0061	0.0081	0	1150	87	4	1	air	700	60	water	63	1.5	710	10	air	25	0	air	25	0	air	25	6	1.5	0.002	970	56
87.9	7	0.4	3	1.3	0	0	0	0	0	0.2	0	0	0.2	0	0	0	1100	92	5	1	air	25	0	air			300	60	air	25	0	air	25	0	air	25	6	5	0.00067	1800	16.7
87.9	7	0.4	3	1.3	0	0	0	0	0	0.2	0	0	0.2	0	0	0	1100	92	5	1	air	25	0	air			400	60	air	25	0	air	25	0	air	25	6	5	0.00067	1815	14.1
87.9	7	0.4	3	1.3	0	0	0	0	0	0.2	0	0	0.2	0	0	0	1100	92	5	1	air	25	0	air			500	60	air	25	0	air	25	0	air	25	6	5	0.00067	1820	14.9
87.9	7	0.4	3	1.3	0	0	0	0	0	0.2	0	0	0.2	0	0	0	1100	92	5	1	air	25	0	air			600	60	air	25	0	air	25	0	air	25	6	5	0.00067	1580	10.3
87.9	7	0.4	3	1.3	0	0	0	0	0	0.2	0	0	0.2	0	0	0	1100	92	5	1	air	25	0	air			700	60	air	25	0	air	25	0	air	25	6	5	0.00067	1130	26.6
74	15	1	10	0	0	0	0	0	0	0	0	0	0	0	0	0	1100	85	3	1	air	25	0	air			1030	60	water	25	0	air	25	0	air	50	12.5	3	0.0005	857.9	59.3
74	15	1	10	0	0	0	0	0	0	0	0	0	0	0	0	0	1100	85	3	1	air	25	0	air			1030	60	oil	25	0	air	25	0	air	50	12.5	3	0.0005	1043.9	37.6
74	15	1	10	0	0	0	0	0	0	0	0	0	0	0	0	0	1100	85	3	1	air	25	0	air			1030	60	air	25	0	air	25	0	air	50	12.5	3	0.0005	1081.9	23.3
92.69	3.84	0.27	1.6	0.6	0	0	0	0	0	0.3	0	0	0.7	0	0	0	1200	96	2.2	1	air	25	0	air			730	20	air	25	0	air	25	0	air	25	6	2.2	0.0013	1006	18.7
92.69	3.84	0.27	1.6	0.6	0	0	0	0	0	0.3	0	0	0.7	0	0	0	1200	96	2.2	1	air	25	0	air			730	20	air	25	0	air	25	0	air	25	6	2.2	0.0013	1118	42.1
92.69	3.84	0.27	1.6	0.6	0	0	0	0	0	0.3	0	0	0.7	0	0	0	1200	96	2.2	1	air	25	0	air			740	20	air	25	0	air	25	0	air	25	6	2.2	0.0013	1225	29.7
85.37	10.2	0.48	2.2	0.7	0	0	0.3	0	0	0	0	0	0.75	0	0	0	1200	90	3	1	water	25	0	air	47	1.6	650	30	air	25	0	air	25	0	air	60	10	1.6	0.00013	1409	16.4
92.52	6.1	0.21	0.97	0.2	0	0	0	0	0	0	0	0	0	0	0	0	750	96	1.5	1	air	25	0	air			662	60	air	25	0	air	25	0	air	25	6	1	0.001	1250	41
90.7	7	0.3	2	0	0	0	0	0	0	0	0	0	0	0	0	0	1200	93	4	1	water	900	30	oil			680	60	air	25	0	air	25	0	air	50	10	4	0.00067	845	45.4
90.7	7	0.3	2	0	0	0	0	0	0	0	0	0	0	0	0	0	1200	93	4	1	water	900	30	oil			700	60	air	25	0	air	25	0	air	50	10	4	0.00067	866	53.5
90.7	7	0.3	2	0	0	0	0	0	0	0	0	0	0	0	0	0	1200	93	4	1	water	900	30	oil			720	60	air	25	0	air	25	0	air	50	10	4	0.00067	1067	57.9
90.7	7	0.3	2	0	0	0	0	0	0	0	0	0	0	0	0	0	1200	93	4	1	water	900	30	oil			750	60	air	25	0	air	25	0	air	50	10	4	0.00067	1211	24.9
87.45	9	0.35	3.2	0	0	0	0	0	0	0	0	0	0	0	0	0	880	83	5	1	water	25	0	air			600	60	water	25	0	air	25	0	air	40	12.5	4	0.001	1150	18.4
87.45	9	0.35	3.2	0	0	0	0	0	0	0	0	0	0	0	0	0	880	83	5	1	water	25	0	air			650	60	water	25	0	air	25	0	air	40	12.5	4	0.001	1180.5	61.4
87.45	9	0.35	3.2	0	0	0	0	0	0	0	0	0	0	0	0	0	880	83	5	1	water	25	0	air			700	60	water	25	0	air	25	0	air	40	12.5	4	0.001	930.2	25.5
86.8	11	0.2	2	0	0	0	0	0	0	0	0	0	0	0	0	0	1200	87	4	1	air	25	0	air	75	1	650	5	water	25	0	air	25	0	air	20	10	1	0.0002	1456	48.2
86.8	11	0.2	2	0	0	0	0	0	0	0	0	0	0	0	0	0	1200	87	4	1	air	25	0	air	75	1	650	5	water	25	0	air	25	0	air	20	10	1	0.002	1250	43.1
86.8	11	0.2	2	0	0	0	0	0	0	0	0	0	0	0	0	0	1200	87	4	1	air	25	0	air	75	1	650	5	water	25	0	air	25	0	air	20	10	1	0.02	1200	42.9
93.3	5	0.2	1	0.5	0	0	0	0	0	0	0	0	0	0	0	0	1200	95	3	1	air	600	120	air	53	1.4	700	3	water	25	0	air	25	0	air	25	6	1.4	0.001	1068	36.36
91.54	6.5	0.16	1.1	0	0	0	0	0.2	0	0.5	0	0	0	0	0	0	1200	85	6	1	oil	650	60	air	75	1.5	650	10	air	25	0	air	25	0	air	25	6	1	0.0008	1259	26.9
91.54	6.5	0.16	1.1	0	0	0	0	0.2	0	0.5	0	0	0	0	0	0	1200	85	6	1	oil	650	60	air	75	1.5	650	30	air	25	0	air	25	0	air	25	6	1	0.0008	1224	33
91.54	6.5	0.16	1.1	0	0	0	0	0.2	0	0.5	0	0	0	0	0	0	1200	85	6	1	oil	650	60	air	75	1.5	650	60	air	25	0	air	25	0	air	25	6	1	0.0008	1184	30
91.54	6.5	0.16	1.1	0	0	0	0	0.2	0	0.5	0	0	0	0	0	0	1200	85	6	1	oil	650	60	air	75	1.5	650	180	air	25	0	air	25	0	air	25	6	1	0.0008	1116	34
91.54	6.5	0.16	1.1	0	0	0	0	0.2	0	0.5	0	0	0	0	0	0	1200	85	6	1	oil	650	60	air	75	1.5	650	270	air	25	0	air	25	0	air	25	6	1	0.0008	1242	30.1
91.54	6.5	0.16	1.1	0	0	0	0	0.2	0	0.5	0	0	0	0	0	0	1200	85	6	1	oil	650	60	air	75	1.5	650	360	air	25	0	air	25	0	air	25	6	1	0.0008	1086	33.9
63.15	27.5	0.95	8.4	0	0	0	0	0	0	0	0	0	0	0	0	0	1100	75	10	1	water	550	0.1	air			25	0	air	25	0	air	25	0	air	15	3	3	0.005	1038	42.9
67.83	27.5	0.97	3.7	0	0	0	0	0	0	0	0	0	0	0	0	0	1100	75	10	1	water	550	0.1	air			25	0	air	25	0	air	25	0	air	15	3	3	0.005	870	40.2
63.13	27.5	0.97	8.4	0	0	0	0	0	0	0	0	0	0	0	0	0	1100	75	10	1	water	550	0.1	air			1035	120	water	25	0	air	25	0	air	15	3	3	0.005	826	62.9
67.83	27.5	0.97	3.7	0	0	0	0	0	0	0	0	0	0	0	0	0	1100	75	10	1	water	550	0.1	air			1035	120	water	25	0	air	25	0	air	15	3	3	0.005	803	54.7
63.13	27.5	0.97	8.4	0	0	0	0	0	0	0	0	0	0	0	0	0	1100	75	10	1	water	550	0.1	air	70	3	25	0	air	25	0	air	25	0	air	15	3	3	0.005	1712	7.24
67.83	27.5	0.97	3.7	0	0	0	0	0	0	0	0	0	0	0	0	0	1100	75	10	1	water	550	0.1	air	70	3	25	0	air	25	0	air	25	0	air	15	3	3	0.005	1615	10.9
67.83	27.5	0.97	3.7	0	0	0	0	0	0	0	0	0	0	0	0	0	1100	75	10	1	water	550	0.1	air	70	3	850	60	furnace	25	0	air	25	0	air	15	3	3	0.005	945	50.2
93.451	5.23	0.11	1.11	0.099	0	0	0	0	0	0	0	0	0	0	0	0	1200	90	3	1	water	25	0	air			600	60	water	25	0	air	25	0	air	50	12.5	3	0.001	647	39.15
93.451	5.23	0.11	1.11	0.099	0	0	0	0	0	0	0	0	0	0	0	0	1200	90	3	1	water	25	0	air			625	60	water	25	0	air	25	0	air	50	12.5	3	0.001	764.15	58.87
93.451	5.23	0.11	1.11	0.099	0	0	0	0	0	0	0	0	0	0	0	0	1200	90	3	1	water	25	0	air			650	60	water	25	0	air	25	0	air	50	12.5	3	0.001	765.52	45.71
93.451	5.23	0.11	1.11	0.099	0	0	0	0	0	0	0	0	0	0	0	0	1200	90	3	1	water	25	0	air			675	60	water	25	0	air	25	0	air	50	12.5	3	0.001	937.17	25.25
93.451	5.23	0.11	1.11	0.099	0	0	0	0	0	0	0	0	0	0	0	0	1200	90	3	1	water	25	0	air			700	60	water	25	0	air	25	0	air	50	12.5	3	0.001	1089.36	26.67
93.451	5.23	0.11	1.11	0.099	0	0	0	0	0	0	0	0	0	0	0	0	1200	90	3	1	water	25	0	air			625	120	water	25	0	air	25	0	air	50	12.5	3	0.001	746.08	69.3
93.451	5.23	0.11	1.11	0.099	0	0	0	0	0	0	0	0	0	0	0	0	1200	90	3	1	water	25	0	air			625	240	water	25	0	air	25	0	air	50	12.5	3	0.001	817.32	70.3
93.451	5.23	0.11	1.11	0.099	0	0	0	0	0	0	0	0	0	0	0	0	1200	90	3	1	water	25	0	air			625	360	water	25	0	air	25	0	air	50	12.5	3	0.001	718.32	74.4
93.451	5.23	0.11	1.11	0.099	0	0	0	0	0	0	0	0	0	0	0	0	1200	90	3	1	water	25	0	air			625	240	furnace	25	0	air	25	0	air	50	12.5	3	0.001	925.76	54.27
91.409	5.95	0.055	1.03	1.55	0	0	0	0	0	0	0	0	0	0.005	0.001	0	1200	95.8	2.5	2	air	600	60	furnace	10	2.25	700	3	air	25	0	air	25	0	air	25	6	2.75	0.002	909	25.5
91.409	5.95	0.055	1.03	1.55	0	0	0	0	0	0	0	0	0	0.005	0.001	0	1200	95.8	2.5	2	air	600	60	furnace	70	0.75	700	3	air	25	0	air	25	0	air	25	6	0.75	0.002	1002	25.3
91.181	4.88	0.2	3.11	0.62	0	0	0	0	0	0	0	0	0	0.004	0.005	0	1200	81.6	5.5	1	air	750	60	air	76	1.8	700	10	air	25	0	air	25	0	air	25	5	1.2	5e-05	831	39.1
91.181	4.88	0.2	3.11	0.62	0	0	0	0	0	0	0	0	0	0.004	0.005	0	1200	81.6	5.5	1	air	750	60	air	76	1.8	730	10	air	25	0	air	25	0	air	25	5	1.2	5e-05	882	59.8
91.181	4.88	0.2	3.11	0.62	0	0	0	0	0	0	0	0	0	0.004	0.005	0	1200	81.6	5.5	1	air	750	60	air	76	1.8	770	10	air	25	0	air	25	0	air	25	5	1.2	5e-05	1060	37.1
91.181	4.88	0.2	3.11	0.62	0	0	0	0	0	0	0	0	0	0.004	0.005	0	1200	81.6	5.5	1	air	750	60	air	76	1.8	850	10	air	25	0	air	25	0	air	25	5	1.2	5e-05	1269	12.8
86.495	7.35	0.15	6	0	0	0	0	0	0	0	0	0	0	0.004	0.001	0	1150	91.4	3	1	water	550	0.1	air			700	60	water	25	0	air	25	0	air	50	12.5	3	0.001	778.3	23
86.495	7.35	0.15	6	0	0	0	0	0	0	0	0	0	0	0.004	0.001	0	1150	91.4	3	1	water	550	0.1	air			800	60	water	25	0	air	25	0	air	50	12.5	3	0.001	724.5	30.5
86.495	7.35	0.15	6	0	0	0	0	0	0	0	0	0	0	0.004	0.001	0	1150	91.4	3	1	water	550	0.1	air			900	60	water	25	0	air	25	0	air	50	12.5	3	0.001	846.4	32
86.495	7.35	0.15	6	0	0	0	0	0	0	0	0	0	0	0.004	0.001	0	1150	91.4	3	1	water	550	0.1	air			1000	60	water	25	0	air	25	0	air	50	12.5	3	0.001	860.3	15
89.646	10.19	0.11	0.004	0.05	0	0	0	0	0	0	0	0	0	0	0	0	1100	80	4	1	air	25	0	air	62.5	1.5	600	60	air	25	0	air	25	0	air	10	3	0.5	0.001	1210	38.1
87.8	10.16	0.12	1.87	0.05	0	0	0	0	0	0	0	0	0	0	0	0	1100	80	4	1	air	25	0	air	62.5	1.5	650	60	air	25	0	air	25	0	air	10	3	0.5	0.001	1137	45.4
82.82	10.02	0.2	3.19	3.17	0	0	0	0.6	0	0	0	0	0	0	0	0	1100	80	6	1	water	25	0	air			1200	15	water	25	0	air	25	0	air	25	6	5	0.004	868	31
82.82	10.02	0.2	3.19	3.17	0	0	0	0.6	0	0	0	0	0	0	0	0	1100	80	6	1	water	25	0	air			900	15	air	25	0	air	25	0	air	25	6	5	0.004	903	23
82.82	10.02	0.2	3.19	3.17	0	0	0	0.6	0	0	0	0	0	0	0	0	1100	80	6	1	water	25	0	air			1100	15	furnace	25	0	air	25	0	air	25	6	5	0.004	775	25
