# Supplementary material for: Composition design and optimization of Fe–C–Mn–Al steel based on machine learning
Source: Royal Society of Chemistry journal article supplement (doi:10.1039/d3cp05453e), 2024-01-01
Supplement: d3cp05453e2.xlsx [file d3cp05453e2.xlsx]

## Sheet: Sheet1
Fe	Mn	C	Al	Si	Cr	Ti	Ni	Mo	Cu	Nb	Zr	B	V	P	S	N	HRST	HRRR	HRS	HRCT	HRCM	PCRAT	PCRAt	PCRAM	CRRR	CRS	AT	At	ACM	AAT	Aat	AACM	TT	Tt	TCM	GL	GW	GH	SR	UTS	TEL
0.689711	0.30177	0.254513	0.475385	0.1	0.1	0.1	0.1	0.1	0.1	0.1	0.1	0.1	0.1	0.1	0.1	0.1	0.7	0.808333	0.247368	0.1	0.1	0.1	0.1	0.1	0.1	0.870604	0.62766	0.166667	0.1	0.1	0.1	0.1	0.1	0.1	0.1	0.750746	0.9	0.681818	0.107604	0.234597	0.577955
0.689711	0.30177	0.254513	0.475385	0.1	0.1	0.1	0.1	0.1	0.1	0.1	0.1	0.1	0.1	0.1	0.1	0.1	0.7	0.808333	0.247368	0.1	0.1	0.1	0.1	0.1	0.1	0.870604	0.62766	0.166667	0.1	0.1	0.1	0.1	0.1	0.1	0.1	0.750746	0.9	0.681818	0.9	0.23981	0.395634
0.689711	0.30177	0.254513	0.475385	0.1	0.1	0.1	0.1	0.1	0.1	0.1	0.1	0.1	0.1	0.1	0.1	0.1	0.7	0.808333	0.247368	0.1	0.1	0.1	0.1	0.1	0.1	0.870604	0.695745	0.166667	0.1	0.1	0.1	0.1	0.1	0.1	0.1	0.750746	0.9	0.681818	0.107604	0.226209	0.422897
0.689711	0.30177	0.254513	0.475385	0.1	0.1	0.1	0.1	0.1	0.1	0.1	0.1	0.1	0.1	0.1	0.1	0.1	0.7	0.808333	0.247368	0.1	0.1	0.1	0.1	0.1	0.1	0.870604	0.695745	0.166667	0.1	0.1	0.1	0.1	0.1	0.1	0.1	0.750746	0.9	0.681818	0.9	0.235261	0.479127
0.689711	0.30177	0.254513	0.475385	0.1	0.1	0.1	0.1	0.1	0.1	0.1	0.1	0.1	0.1	0.1	0.1	0.1	0.7	0.808333	0.247368	0.1	0.1	0.1	0.1	0.1	0.1	0.870604	0.76383	0.166667	0.1	0.1	0.1	0.1	0.1	0.1	0.1	0.750746	0.9	0.681818	0.107604	0.245498	0.323216
0.689711	0.30177	0.254513	0.475385	0.1	0.1	0.1	0.1	0.1	0.1	0.1	0.1	0.1	0.1	0.1	0.1	0.1	0.7	0.808333	0.247368	0.1	0.1	0.1	0.1	0.1	0.1	0.870604	0.76383	0.166667	0.1	0.1	0.1	0.1	0.1	0.1	0.1	0.750746	0.9	0.681818	0.9	0.290521	0.405005
0.730505	0.267733	0.165759	0.341231	0.361463	0.1	0.1	0.1	0.1	0.1	0.1	0.1	0.1	0.1	0.526667	0.342424	0.1	0.673333	0.6	0.1	0.1	0.1	0.1	0.1	0.1	0.1	0.765617	0.593617	0.233333	0.1	0.1	0.1	0.1	0.1	0.1	0.1	0.377612	0.404762	0.172727	0.100664	0.254976	0.60181
0.730505	0.267733	0.165759	0.341231	0.361463	0.1	0.1	0.1	0.1	0.1	0.1	0.1	0.1	0.1	0.526667	0.342424	0.1	0.673333	0.6	0.1	0.1	0.1	0.1	0.1	0.1	0.1	0.765617	0.593617	0.233333	0.1	0.1	0.1	0.1	0.1	0.1	0.1	0.377612	0.404762	0.172727	0.104922	0.22891	0.414377
0.730505	0.267733	0.165759	0.341231	0.361463	0.1	0.1	0.1	0.1	0.1	0.1	0.1	0.1	0.1	0.526667	0.342424	0.1	0.673333	0.6	0.1	0.1	0.1	0.1	0.1	0.1	0.1	0.765617	0.593617	0.233333	0.1	0.1	0.1	0.1	0.1	0.1	0.1	0.377612	0.404762	0.172727	0.110245	0.216114	0.32918
0.610108	0.394078	0.351336	0.523385	0.1	0.1	0.1	0.1	0.1	0.1	0.1	0.1	0.1	0.1	0.1	0.1	0.1	0.833333	0.741667	0.226316	0.1	0.1	0.793333	0.133333	0.9	0.820288	0.1021	0.559574	0.122222	0.9	0.1	0.1	0.1	0.1	0.1	0.1	0.377612	0.404762	0.172727	0.107604	0.484692	0.228647
0.610108	0.394078	0.351336	0.523385	0.1	0.1	0.1	0.1	0.1	0.1	0.1	0.1	0.1	0.1	0.1	0.1	0.1	0.833333	0.741667	0.226316	0.1	0.1	0.793333	0.133333	0.9	0.820288	0.1021	0.593617	0.122222	0.9	0.1	0.1	0.1	0.1	0.1	0.1	0.377612	0.404762	0.172727	0.107604	0.420616	0.296805
0.610108	0.394078	0.351336	0.523385	0.1	0.1	0.1	0.1	0.1	0.1	0.1	0.1	0.1	0.1	0.1	0.1	0.1	0.833333	0.741667	0.226316	0.1	0.1	0.793333	0.133333	0.9	0.820288	0.1021	0.62766	0.122222	0.9	0.1	0.1	0.1	0.1	0.1	0.1	0.377612	0.404762	0.172727	0.107604	0.333839	0.382002
0.610108	0.394078	0.351336	0.523385	0.1	0.1	0.1	0.1	0.1	0.1	0.1	0.1	0.1	0.1	0.1	0.1	0.1	0.833333	0.741667	0.226316	0.1	0.1	0.793333	0.133333	0.9	0.820288	0.1021	0.661702	0.122222	0.9	0.1	0.1	0.1	0.1	0.1	0.1	0.377612	0.404762	0.172727	0.107604	0.320758	0.457827
0.551986	0.392444	0.464297	0.708	0.1	0.1	0.1	0.1	0.1	0.1	0.1	0.1	0.1	0.1	0.1	0.1	0.1	0.833333	0.741667	0.226316	0.1	0.1	0.793333	0.133333	0.9	0.820288	0.1021	0.76383	0.122222	0.9	0.1	0.1	0.1	0.1	0.1	0.1	0.377612	0.404762	0.172727	0.107604	0.391232	0.387114
0.552527	0.382641	0.597428	0.708	0.1	0.1	0.1	0.1	0.1	0.1	0.1	0.1	0.1	0.1	0.1	0.1	0.1	0.833333	0.741667	0.226316	0.1	0.1	0.793333	0.133333	0.9	0.820288	0.1021	0.695745	0.122222	0.9	0.1	0.1	0.1	0.1	0.1	0.1	0.377612	0.404762	0.172727	0.107604	0.479526	0.125559
0.552527	0.382641	0.597428	0.708	0.1	0.1	0.1	0.1	0.1	0.1	0.1	0.1	0.1	0.1	0.1	0.1	0.1	0.833333	0.741667	0.226316	0.1	0.1	0.793333	0.133333	0.9	0.820288	0.1021	0.729787	0.122222	0.9	0.1	0.1	0.1	0.1	0.1	0.1	0.377612	0.404762	0.172727	0.107604	0.484834	0.193717
0.552527	0.382641	0.597428	0.708	0.1	0.1	0.1	0.1	0.1	0.1	0.1	0.1	0.1	0.1	0.1	0.1	0.1	0.833333	0.741667	0.226316	0.1	0.1	0.793333	0.133333	0.9	0.820288	0.1021	0.76383	0.122222	0.9	0.1	0.1	0.1	0.1	0.1	0.1	0.377612	0.404762	0.172727	0.107604	0.497773	0.271246
0.516968	0.682165	0.335199	0.192308	0.1	0.1	0.1	0.1	0.1	0.1	0.1	0.1	0.1	0.1	0.1	0.1	0.1	0.566667	0.6	0.142105	0.1	0.1	0.1	0.1	0.1	0.580192	0.1021	0.593617	0.122222	0.9	0.1	0.1	0.1	0.1	0.1	0.1	0.750746	0.9	0.172727	0.1004	0.40237	0.465495
0.683556	0.279986	0.12945	0.372	0.488293	0.128821	0.1	0.1	0.366667	0.30202	0.188	0.1	0.102581	0.1	0.1	0.1	0.1	0.833333	0.766667	0.226316	0.1	0.9	0.615556	0.266667	0.1	0.70024	0.106299	0.593617	0.144444	0.9	0.1	0.1	0.1	0.1	0.1	0.1	0.377612	0.404762	0.245455	0.104882	0.299526	0.377913
0.686323	0.355412	0.254513	0.346154	0.158537	0.1	0.1	0.1	0.1	0.1	0.1	0.1	0.1	0.1	0.1992	0.303636	0.1	0.7	0.766667	0.226316	0.1	0.1	0.58	0.133333	0.1	0.484154	0.113858	0.593617	0.166667	0.1	0.1	0.1	0.1	0.1	0.1	0.1	0.228358	0.328571	0.172727	0.103602	0.309431	0.358999
0.686323	0.355412	0.254513	0.346154	0.158537	0.1	0.1	0.1	0.1	0.1	0.1	0.1	0.1	0.1	0.1992	0.303636	0.1	0.7	0.766667	0.226316	0.1	0.1	0.58	0.133333	0.1	0.67623	0.107139	0.593617	0.166667	0.1	0.1	0.1	0.1	0.1	0.1	0.1	0.228358	0.328571	0.172727	0.103602	0.342227	0.429712
0.686323	0.355412	0.254513	0.346154	0.158537	0.1	0.1	0.1	0.1	0.1	0.1	0.1	0.1	0.1	0.1992	0.303636	0.1	0.7	0.766667	0.226316	0.1	0.1	0.58	0.133333	0.1	0.772269	0.10378	0.593617	0.166667	0.1	0.1	0.1	0.1	0.1	0.1	0.1	0.228358	0.328571	0.172727	0.103602	0.32891	0.319808
0.877527	0.123145	0.193999	0.1	0.412195	0.144541	0.1	0.1	0.46	0.1	0.1	0.1	0.1	0.1	0.206667	0.221212	0.366667	0.433333	0.433333	0.563158	0.1	0.1	0.1	0.1	0.1	0.1	0.681627	0.1	0.1	0.1	0.751163	0.5	0.9	0.76087	0.5	0.1	0.526866	0.480952	0.463636	0.103442	0.652133	0.146858
0.877527	0.123145	0.193999	0.1	0.412195	0.144541	0.1	0.1	0.46	0.1	0.1	0.1	0.1	0.1	0.206667	0.221212	0.366667	0.433333	0.433333	0.563158	0.1	0.1	0.1	0.1	0.1	0.1	0.681627	0.1	0.1	0.1	0.751163	0.5	0.9	0.621739	0.5	0.1	0.526866	0.480952	0.463636	0.103442	0.618957	0.151118
0.877527	0.123145	0.193999	0.1	0.412195	0.144541	0.1	0.1	0.46	0.1	0.1	0.1	0.1	0.1	0.206667	0.221212	0.366667	0.433333	0.433333	0.563158	0.1	0.1	0.1	0.1	0.1	0.1	0.681627	0.1	0.1	0.1	0.751163	0.5	0.9	0.454783	0.5	0.1	0.526866	0.480952	0.463636	0.103442	0.552607	0.153674
0.877527	0.123145	0.193999	0.1	0.412195	0.144541	0.1	0.1	0.46	0.1	0.1	0.1	0.1	0.1	0.206667	0.221212	0.366667	0.433333	0.433333	0.563158	0.1	0.1	0.1	0.1	0.1	0.1	0.681627	0.1	0.1	0.1	0.751163	0.5	0.9	0.343478	0.5	0.1	0.526866	0.480952	0.463636	0.103442	0.434123	0.162194
0.877527	0.123145	0.193999	0.1	0.412195	0.144541	0.1	0.1	0.46	0.1	0.1	0.1	0.1	0.1	0.206667	0.221212	0.366667	0.433333	0.433333	0.563158	0.1	0.1	0.1	0.1	0.1	0.1	0.681627	0.1	0.1	0.1	0.751163	0.5	0.9	0.1	0.1	0.1	0.526866	0.480952	0.463636	0.103442	0.699526	0.157082
0.825632	0.268278	0.173828	0.1	0.1	0.1	0.1	0.1	0.1	0.1	0.1	0.1	0.1	0.1	0.1	0.1	0.1	0.833333	0.75	0.196842	0.1	0.1	0.1	0.1	0.1	0.1	0.841207	0.1	0.1	0.1	0.1	0.1	0.1	0.1	0.1	0.1	0.228358	0.328571	0.507273	0.107604	0.678199	0.187753
0.793141	0.265555	0.173828	0.1	0.470732	0.1	0.1	0.1	0.1	0.1	0.1	0.1	0.1	0.1	0.1	0.1	0.1	0.833333	0.75	0.196842	0.1	0.1	0.1	0.1	0.1	0.1	0.841207	0.1	0.1	0.1	0.1	0.1	0.1	0.1	0.1	0.1	0.228358	0.328571	0.507273	0.107604	0.800474	0.191161
0.751625	0.268278	0.173828	0.1	0.9	0.1	0.1	0.1	0.1	0.1	0.1	0.1	0.1	0.1	0.1	0.1	0.1	0.833333	0.75	0.196842	0.1	0.1	0.1	0.1	0.1	0.1	0.841207	0.1	0.1	0.1	0.1	0.1	0.1	0.1	0.1	0.1	0.228358	0.328571	0.507273	0.107604	0.9	0.181789
0.739892	0.27917	0.193999	0.192308	0.256098	0.274672	0.1	0.1	0.1	0.1	0.1	0.1	0.1	0.1	0.1	0.1	0.1	0.766667	0.808333	0.184211	0.1	0.1	0.1	0.1	0.1	0.1	0.870604	0.1	0.1	0.1	0.691628	0.3	0.1	0.301739	0.233333	0.1	0.467164	0.404762	0.463636	0.107604	0.718483	0.232907
0.605957	0.406603	0.544982	0.479692	0.1	0.1	0.1	0.1	0.1	0.1	0.1	0.1	0.1	0.1	0.1	0.1	0.1	0.806667	0.7205	0.226316	0.1	0.9	0.1	0.1	0.1	0.820288	0.1021	0.559574	0.133333	0.9	0.1	0.1	0.1	0.1	0.1	0.1	0.377612	0.404762	0.172727	0.107604	0.379621	0.288967
0.605957	0.406603	0.544982	0.479692	0.1	0.1	0.1	0.1	0.1	0.1	0.1	0.1	0.1	0.1	0.1	0.1	0.1	0.806667	0.7205	0.226316	0.1	0.9	0.1	0.1	0.1	0.820288	0.1021	0.593617	0.133333	0.9	0.1	0.1	0.1	0.1	0.1	0.1	0.377612	0.404762	0.172727	0.107604	0.344076	0.39393
0.605957	0.406603	0.544982	0.479692	0.1	0.1	0.1	0.1	0.1	0.1	0.1	0.1	0.1	0.1	0.1	0.1	0.1	0.806667	0.7205	0.226316	0.1	0.9	0.1	0.1	0.1	0.820288	0.1021	0.62766	0.133333	0.9	0.1	0.1	0.1	0.1	0.1	0.1	0.377612	0.404762	0.172727	0.107604	0.320379	0.417785
0.605957	0.406603	0.544982	0.479692	0.1	0.1	0.1	0.1	0.1	0.1	0.1	0.1	0.1	0.1	0.1	0.1	0.1	0.806667	0.7205	0.226316	0.1	0.9	0.1	0.1	0.1	0.820288	0.1021	0.661702	0.133333	0.9	0.1	0.1	0.1	0.1	0.1	0.1	0.377612	0.404762	0.172727	0.107604	0.293839	0.387966
0.605957	0.406603	0.544982	0.479692	0.1	0.1	0.1	0.1	0.1	0.1	0.1	0.1	0.1	0.1	0.1	0.1	0.1	0.806667	0.7205	0.226316	0.1	0.9	0.1	0.1	0.1	0.820288	0.1021	0.695745	0.133333	0.9	0.1	0.1	0.1	0.1	0.1	0.1	0.377612	0.404762	0.172727	0.107604	0.266825	0.37689
0.568051	0.410688	0.508674	0.605231	0.1	0.1	0.1	0.1	0.1	0.1	0.1	0.1	0.1	0.1	0.1	0.1	0.1	0.806667	0.7205	0.226316	0.1	0.9	0.1	0.1	0.1	0.820288	0.1021	0.559574	0.133333	0.9	0.1	0.1	0.1	0.1	0.1	0.1	0.377612	0.404762	0.172727	0.107604	0.496209	0.203088
0.568051	0.410688	0.508674	0.605231	0.1	0.1	0.1	0.1	0.1	0.1	0.1	0.1	0.1	0.1	0.1	0.1	0.1	0.806667	0.7205	0.226316	0.1	0.9	0.1	0.1	0.1	0.820288	0.1021	0.593617	0.133333	0.9	0.1	0.1	0.1	0.1	0.1	0.1	0.377612	0.404762	0.172727	0.107604	0.445972	0.247391
0.568051	0.410688	0.508674	0.605231	0.1	0.1	0.1	0.1	0.1	0.1	0.1	0.1	0.1	0.1	0.1	0.1	0.1	0.806667	0.7205	0.226316	0.1	0.9	0.1	0.1	0.1	0.820288	0.1021	0.62766	0.133333	0.9	0.1	0.1	0.1	0.1	0.1	0.1	0.377612	0.404762	0.172727	0.107604	0.375355	0.384558
0.568051	0.410688	0.508674	0.605231	0.1	0.1	0.1	0.1	0.1	0.1	0.1	0.1	0.1	0.1	0.1	0.1	0.1	0.806667	0.7205	0.226316	0.1	0.9	0.1	0.1	0.1	0.820288	0.1021	0.661702	0.133333	0.9	0.1	0.1	0.1	0.1	0.1	0.1	0.377612	0.404762	0.172727	0.107604	0.340758	0.464643
0.568051	0.410688	0.508674	0.605231	0.1	0.1	0.1	0.1	0.1	0.1	0.1	0.1	0.1	0.1	0.1	0.1	0.1	0.806667	0.7205	0.226316	0.1	0.9	0.1	0.1	0.1	0.820288	0.1021	0.695745	0.133333	0.9	0.1	0.1	0.1	0.1	0.1	0.1	0.377612	0.404762	0.172727	0.107604	0.316114	0.399553
0.740489	0.266644	0.246445	0.279077	0.347805	0.1	0.1	0.1	0.1	0.1	0.1272	0.1	0.107484	0.437778	0.1	0.1	0.1	0.766667	0.796667	0.264211	0.1	0.1	0.1	0.1	0.1	0.1	0.864724	0.62766	0.166667	0.1	0.1	0.1	0.1	0.273913	0.9	0.1	0.377612	0.404762	0.74	0.104962	0.875829	0.218424
0.689711	0.30177	0.254513	0.475385	0.1	0.1	0.1	0.1	0.1	0.1	0.1	0.1	0.1	0.1	0.1	0.1	0.1	0.7	0.808333	0.247368	0.1	0.1	0.1	0.1	0.1	0.1	0.870604	0.1	0.1	0.1	0.1	0.1	0.1	0.1	0.1	0.1	0.601493	0.9	0.681818	0.107604	0.233175	0.559212
0.843177	0.168618	0.246445	0.126462	0.42	0.120961	0.1	0.1	0.3	0.1	0.1384	0.1	0.1	0.1	0.1	0.1	0.1	0.766667	0.7205	0.310526	0.9	0.1	0.551556	0.133333	0.1	0.1	0.826341	0.576596	0.166667	0.9	0.1	0.1	0.1	0.1	0.1	0.1	0.377612	0.404762	0.463636	0.107604	0.523697	0.248243
0.843177	0.168618	0.246445	0.126462	0.42	0.120961	0.1	0.1	0.3	0.1	0.1384	0.1	0.1	0.1	0.1	0.1	0.1	0.766667	0.7205	0.310526	0.9	0.1	0.551556	0.133333	0.1	0.1	0.826341	0.576596	0.166667	0.1	0.1	0.1	0.1	0.1	0.1	0.1	0.377612	0.404762	0.463636	0.107604	0.509005	0.238019
0.843177	0.168618	0.246445	0.126462	0.42	0.120961	0.1	0.1	0.3	0.1	0.1384	0.1	0.1	0.1	0.1	0.1	0.1	0.766667	0.7205	0.310526	0.9	0.1	0.551556	0.133333	0.1	0.1	0.826341	0.576596	0.166667	0.9	0.1	0.1	0.1	0.482609	0.3	0.9	0.377612	0.404762	0.463636	0.107604	0.46019	0.296805
0.843177	0.168618	0.246445	0.126462	0.42	0.120961	0.1	0.1	0.3	0.1	0.1384	0.1	0.1	0.1	0.1	0.1	0.1	0.766667	0.7205	0.310526	0.9	0.1	0.551556	0.133333	0.1	0.1	0.826341	0.576596	0.166667	0.9	0.1	0.1	0.1	0.482609	0.3	0.1	0.377612	0.404762	0.463636	0.107604	0.509479	0.272098
0.671065	0.413683	0.210136	0.282154	0.1	0.1	0.1	0.1	0.1	0.1	0.1504	0.1	0.1	0.197778	0.1	0.1	0.1	0.74	0.836667	0.226316	0.1	0.1	0.1	0.1	0.1	0.820288	0.1021	0.559574	0.233333	0.1	0.1	0.1	0.1	0.1	0.1	0.1	0.377612	0.404762	0.172727	0.115608	0.365024	0.396486
0.627076	0.219265	0.496571	0.776923	0.1	0.1	0.1	0.1	0.1	0.1	0.9	0.1	0.1	0.1	0.1	0.1	0.1	0.7	0.808333	0.184211	0.1	0.1	0.1	0.1	0.1	0.1	0.870604	0.1	0.1	0.1	0.1	0.1	0.1	0.1	0.1	0.1	0.19403	0.17619	0.318182	0.107604	0.38673	0.157082
0.627076	0.219265	0.496571	0.776923	0.1	0.1	0.1	0.1	0.1	0.1	0.9	0.1	0.1	0.1	0.1	0.1	0.1	0.7	0.808333	0.184211	0.1	0.1	0.793333	0.133333	0.366667	0.1	0.870604	0.1	0.1	0.1	0.1	0.1	0.1	0.1	0.1	0.1	0.19403	0.17619	0.318182	0.107604	0.301422	0.184345
0.627076	0.219265	0.496571	0.776923	0.1	0.1	0.1	0.1	0.1	0.1	0.9	0.1	0.1	0.1	0.1	0.1	0.1	0.7	0.808333	0.184211	0.1	0.1	0.1	0.1	0.1	0.416927	0.110499	0.76383	0.233333	0.3	0.1	0.1	0.1	0.1	0.1	0.1	0.19403	0.17619	0.318182	0.107604	0.34455	0.206496
0.536823	0.355412	0.496571	0.776923	0.1	0.1	0.1	0.1	0.1	0.1	0.9	0.1	0.1	0.1	0.1	0.1	0.1	0.7	0.808333	0.184211	0.1	0.1	0.1	0.1	0.1	0.1	0.870604	0.1	0.1	0.1	0.1	0.1	0.1	0.1	0.1	0.1	0.19403	0.17619	0.318182	0.107604	0.449763	0.163046
0.536823	0.355412	0.496571	0.776923	0.1	0.1	0.1	0.1	0.1	0.1	0.9	0.1	0.1	0.1	0.1	0.1	0.1	0.7	0.808333	0.184211	0.1	0.1	0.793333	0.133333	0.366667	0.1	0.870604	0.1	0.1	0.1	0.1	0.1	0.1	0.1	0.1	0.1	0.19403	0.17619	0.318182	0.107604	0.357346	0.195421
0.536823	0.355412	0.496571	0.776923	0.1	0.1	0.1	0.1	0.1	0.1	0.9	0.1	0.1	0.1	0.1	0.1	0.1	0.7	0.808333	0.184211	0.1	0.1	0.1	0.1	0.1	0.416927	0.110499	0.76383	0.233333	0.3	0.1	0.1	0.1	0.1	0.1	0.1	0.19403	0.17619	0.318182	0.107604	0.403318	0.214164
0.831047	0.219265	0.173828	0.192308	0.1	0.1	0.1	0.1	0.1	0.1	0.1	0.1	0.1	0.1	0.1	0.1	0.1	0.633333	0.7205	0.184211	0.1	0.1	0.1	0.1	0.1	0.1	0.826341	0.545957	0.144444	0.1	0.1	0.1	0.1	0.1	0.1	0.1	0.377612	0.404762	0.463636	0.112406	0.274408	0.341108
0.781949	0.249762	0.181896	0.289538	0.1	0.1	0.1	0.1	0.1	0.1	0.1	0.1	0.1	0.1	0.1	0.1	0.1	0.766667	0.683333	0.247368	0.1	0.1	0.1	0.1	0.1	0.1	0.807612	0.586809	0.122222	0.1	0.1	0.1	0.1	0.1	0.1	0.1	0.377612	0.328571	0.201818	0.1004	0.345024	0.487646
0.302166	0.818312	0.496571	0.592308	0.1	0.1	0.1	0.1	0.1	0.1	0.1	0.1	0.1	0.1	0.1	0.1	0.1	0.633333	0.683333	0.184211	0.1	0.9	0.1	0.1	0.1	0.67623	0.10378	0.695745	0.106667	0.9	0.1	0.1	0.1	0.1	0.1	0.1	0.302985	0.252381	0.201818	0.103602	0.389573	0.525133
0.293141	0.818312	0.496571	0.592308	0.1	0.1	0.1	0.1	0.1	0.1	0.1	0.1	0.1	0.544444	0.1	0.1	0.1	0.633333	0.683333	0.184211	0.1	0.9	0.1	0.1	0.1	0.67623	0.10378	0.695745	0.106667	0.9	0.1	0.1	0.1	0.1	0.1	0.1	0.302985	0.252381	0.201818	0.103602	0.411848	0.465495
0.730505	0.267733	0.165759	0.341231	0.361463	0.1	0.1	0.1	0.1	0.1	0.1	0.1	0.1	0.1	0.526667	0.342424	0.1	0.7	0.6	0.310526	0.1	0.1	0.1	0.1	0.1	0.1	0.765617	0.559574	0.233333	0.3	0.1	0.1	0.1	0.1	0.1	0.1	0.377612	0.404762	0.9	0.110005	0.233649	0.371778
0.730505	0.267733	0.165759	0.341231	0.361463	0.1	0.1	0.1	0.1	0.1	0.1	0.1	0.1	0.1	0.526667	0.342424	0.1	0.7	0.6	0.310526	0.1	0.1	0.1	0.1	0.1	0.1	0.765617	0.593617	0.233333	0.3	0.1	0.1	0.1	0.1	0.1	0.1	0.377612	0.404762	0.9	0.110005	0.254976	0.60181
0.730505	0.267733	0.165759	0.341231	0.361463	0.1	0.1	0.1	0.1	0.1	0.1	0.1	0.1	0.1	0.526667	0.342424	0.1	0.7	0.6	0.310526	0.1	0.1	0.1	0.1	0.1	0.1	0.765617	0.62766	0.233333	0.3	0.1	0.1	0.1	0.1	0.1	0.1	0.377612	0.404762	0.9	0.110005	0.240284	0.448456
0.796913	0.245133	0.11533	0.163385	0.402439	0.1	0.1	0.1	0.1	0.1	0.1	0.1	0.1	0.1	0.153333	0.124242	0.1	0.833333	0.863333	0.163158	0.1	0.1	0.508889	0.133333	0.366667	0.196038	0.112598	0.559574	0.106667	0.1	0.1	0.1	0.1	0.1	0.1	0.1	0.377612	0.404762	0.354545	0.115608	0.305687	0.299361
0.796913	0.245133	0.11533	0.163385	0.402439	0.1	0.1	0.1	0.1	0.1	0.1	0.1	0.1	0.1	0.153333	0.124242	0.1	0.833333	0.863333	0.163158	0.1	0.1	0.508889	0.133333	0.366667	0.772269	0.1	0.559574	0.106667	0.1	0.1	0.1	0.1	0.1	0.1	0.1	0.377612	0.404762	0.136364	0.115608	0.349763	0.297657
0.818412	0.273724	0.173828	0.1	0.139024	0.1	0.1	0.1	0.1	0.1	0.1	0.1	0.1	0.1	0.1	0.1	0.1	0.833333	0.733333	0.205263	0.1	0.1	0.1	0.1	0.1	0.1	0.832808	0.522128	0.233333	0.1	0.1	0.1	0.1	0.1	0.1	0.1	0.183582	0.214286	0.187273	0.107604	0.418009	0.380298
0.818412	0.273724	0.173828	0.1	0.139024	0.1	0.1	0.1	0.1	0.1	0.1	0.1	0.1	0.1	0.1	0.1	0.1	0.833333	0.733333	0.205263	0.1	0.1	0.540889	0.233333	0.1	0.647419	0.106299	0.511915	0.366667	0.1	0.1	0.1	0.1	0.1	0.1	0.1	0.183582	0.214286	0.187273	0.107604	0.352607	0.431416
0.767329	0.272362	0.173828	0.289538	0.1	0.1	0.1	0.1	0.1	0.1	0.1	0.1	0.1	0.1	0.1	0.1	0.1	0.833333	0.891667	0.184211	0.1	0.1	0.1	0.1	0.1	0.580192	0.106299	0.545957	0.233333	0.7	0.9	0.9	0.5	0.1	0.1	0.1	0.377612	0.404762	0.245455	0.103602	0.250711	0.336848
0.767329	0.272362	0.173828	0.289538	0.1	0.1	0.1	0.1	0.1	0.1	0.1	0.1	0.1	0.1	0.1	0.1	0.1	0.833333	0.891667	0.184211	0.1	0.1	0.1	0.1	0.1	0.580192	0.106299	0.600426	0.233333	0.7	0.9	0.9	0.5	0.1	0.1	0.1	0.377612	0.404762	0.245455	0.103602	0.398578	0.26443
0.810686	0.279714	0.130661	0.1008	0.19561	0.1	0.1	0.1	0.1	0.1	0.1	0.1	0.1	0.1	0.153333	0.269697	0.1	0.7	0.7205	0.184211	0.1	0.1	0.1	0.1	0.1	0.1	0.826341	0.1	0.1	0.1	0.1	0.1	0.1	0.1	0.1	0.1	0.377612	0.427619	0.463636	0.107604	0.456398	0.289137
0.810686	0.279714	0.130661	0.1008	0.19561	0.1	0.1	0.1	0.1	0.1	0.1	0.1	0.1	0.1	0.153333	0.269697	0.1	0.7	0.7205	0.184211	0.1	0.1	0.1	0.1	0.1	0.628211	0.105879	0.518723	0.166667	0.1	0.1	0.1	0.1	0.1	0.1	0.1	0.377612	0.427619	0.238182	0.107604	0.536967	0.267838
0.824188	0.243771	0.206102	0.155385	0.1	0.1	0.1	0.1	0.1	0.1	0.1	0.1	0.1	0.1	0.1	0.1	0.1	0.833333	0.85	0.121053	0.1	0.1	0.1	0.1	0.1	0.1	0.891601	0.518723	0.233333	0.1	0.1	0.1	0.1	0.1	0.1	0.1	0.377612	0.404762	0.245455	0.107604	0.367773	0.45016
0.824188	0.243771	0.206102	0.155385	0.1	0.1	0.1	0.1	0.1	0.1	0.1	0.1	0.1	0.1	0.1	0.1	0.1	0.833333	0.85	0.121053	0.1	0.1	0.1	0.1	0.1	0.1	0.891601	0.53234	0.233333	0.1	0.1	0.1	0.1	0.1	0.1	0.1	0.377612	0.404762	0.245455	0.107604	0.424645	0.457827
0.824188	0.243771	0.206102	0.155385	0.1	0.1	0.1	0.1	0.1	0.1	0.1	0.1	0.1	0.1	0.1	0.1	0.1	0.833333	0.85	0.121053	0.1	0.1	0.1	0.1	0.1	0.1	0.891601	0.545957	0.233333	0.1	0.1	0.1	0.1	0.1	0.1	0.1	0.377612	0.404762	0.245455	0.107604	0.538389	0.414377
0.824188	0.243771	0.206102	0.155385	0.1	0.1	0.1	0.1	0.1	0.1	0.1	0.1	0.1	0.1	0.1	0.1	0.1	0.833333	0.85	0.121053	0.1	0.1	0.1	0.1	0.1	0.1	0.891601	0.559574	0.233333	0.1	0.1	0.1	0.1	0.1	0.1	0.1	0.377612	0.404762	0.245455	0.107604	0.609479	0.184345
0.484711	0.725732	0.270651	0.210769	0.109171	0.1	0.1	0.1	0.1	0.1	0.1	0.1	0.1	0.1	0.1	0.1	0.1	0.833333	0.7205	0.790526	0.1	0.9	0.1	0.1	0.1	0.772269	0.196	0.511915	0.122222	0.9	0.1	0.1	0.1	0.1	0.1	0.1	0.228358	0.328571	0.245455	0.102801	0.284834	0.509798
0.484711	0.725732	0.270651	0.210769	0.109171	0.1	0.1	0.1	0.1	0.1	0.1	0.1	0.1	0.1	0.1	0.1	0.1	0.833333	0.7205	0.790526	0.1	0.9	0.1	0.1	0.1	0.772269	0.196	0.586809	0.122222	0.9	0.1	0.1	0.1	0.1	0.1	0.1	0.228358	0.328571	0.245455	0.102801	0.260664	0.460383
0.484711	0.725732	0.270651	0.210769	0.109171	0.1	0.1	0.1	0.1	0.1	0.1	0.1	0.1	0.1	0.1	0.1	0.1	0.833333	0.7205	0.790526	0.1	0.9	0.1	0.1	0.1	0.772269	0.196	0.695745	0.122222	0.9	0.1	0.1	0.1	0.1	0.1	0.1	0.228358	0.328571	0.245455	0.102801	0.227962	0.645261
0.446715	0.54983	0.105245	0.210769	0.1	0.885153	0.1	0.1	0.1	0.1	0.1	0.1	0.1	0.1	0.142667	0.269697	0.66	0.766667	0.516667	0.9	0.1	0.1	0.1	0.1	0.1	0.1	0.723622	0.62766	0.366667	0.9	0.1	0.1	0.1	0.1	0.1	0.1	0.183582	0.252381	0.318182	0.107604	0.144076	0.743237
0.437022	0.562083	0.133485	0.208923	0.1	0.88952	0.1	0.1	0.1	0.1	0.1	0.1	0.1	0.1	0.132	0.245455	0.633333	0.766667	0.516667	0.9	0.1	0.1	0.1	0.1	0.1	0.1	0.723622	0.62766	0.366667	0.9	0.1	0.1	0.1	0.1	0.1	0.1	0.183582	0.252381	0.318182	0.107604	0.154976	0.595847
0.421011	0.573519	0.222239	0.216308	0.1	0.9	0.1	0.1	0.1	0.1	0.1	0.1	0.1	0.1	0.153333	0.293939	0.713333	0.766667	0.516667	0.9	0.1	0.1	0.1	0.1	0.1	0.1	0.723622	0.62766	0.366667	0.9	0.1	0.1	0.1	0.1	0.1	0.1	0.183582	0.252381	0.318182	0.107604	0.200474	0.710863
0.412581	0.578965	0.310993	0.222462	0.1	0.895633	0.1	0.1	0.1	0.1	0.1	0.1	0.1	0.1	0.142667	0.221212	0.74	0.766667	0.516667	0.9	0.1	0.1	0.1	0.1	0.1	0.1	0.723622	0.62766	0.366667	0.9	0.1	0.1	0.1	0.1	0.1	0.1	0.183582	0.252381	0.318182	0.107604	0.252133	0.781576
0.271119	0.80742	0.641805	0.700615	0.1	0.1	0.1	0.1	0.1	0.1	0.1	0.1	0.1	0.1	0.1	0.1	0.1	0.633333	0.683333	0.184211	0.1	0.9	0.1	0.1	0.1	0.388115	0.111339	0.1	0.1	0.1	0.1	0.1	0.1	0.1	0.1	0.1	0.9	0.252381	0.318182	0.103602	0.554976	0.235463
0.271119	0.80742	0.641805	0.700615	0.1	0.1	0.1	0.1	0.1	0.1	0.1	0.1	0.1	0.1	0.1	0.1	0.1	0.633333	0.683333	0.184211	0.1	0.9	0.1	0.1	0.1	0.388115	0.111339	0.661702	0.106667	0.9	0.1	0.1	0.1	0.1	0.1	0.1	0.9	0.252381	0.318182	0.103602	0.532227	0.380298
0.271119	0.80742	0.641805	0.700615	0.1	0.1	0.1	0.1	0.1	0.1	0.1	0.1	0.1	0.1	0.1	0.1	0.1	0.633333	0.683333	0.184211	0.1	0.9	0.1	0.1	0.1	0.388115	0.111339	0.695745	0.106667	0.9	0.1	0.1	0.1	0.1	0.1	0.1	0.9	0.252381	0.318182	0.103602	0.493839	0.409436
0.271119	0.80742	0.641805	0.700615	0.1	0.1	0.1	0.1	0.1	0.1	0.1	0.1	0.1	0.1	0.1	0.1	0.1	0.633333	0.683333	0.184211	0.1	0.9	0.1	0.1	0.1	0.388115	0.111339	0.729787	0.106667	0.9	0.1	0.1	0.1	0.1	0.1	0.1	0.9	0.252381	0.318182	0.103602	0.467773	0.448456
0.710226	0.223349	0.189965	0.381846	0.377073	0.10262	0.1	0.378543	0.1	0.180808	0.1	0.1	0.1	0.1	0.526667	0.342424	0.193333	0.433333	0.433333	0.310526	0.1	0.9	0.1	0.1	0.1	0.580192	0.118898	0.559574	0.166667	0.9	0.1	0.1	0.1	0.1	0.1	0.1	0.183582	0.404762	0.463636	0.105203	0.535071	0.175825
0.710226	0.223349	0.189965	0.381846	0.377073	0.10262	0.1	0.378543	0.1	0.180808	0.1	0.1	0.1	0.1	0.526667	0.342424	0.193333	0.433333	0.433333	0.310526	0.1	0.9	0.1	0.1	0.1	0.580192	0.118898	0.62766	0.166667	0.9	0.1	0.1	0.1	0.1	0.1	0.1	0.183582	0.404762	0.463636	0.105203	0.547867	0.363259
0.710226	0.223349	0.189965	0.381846	0.377073	0.10262	0.1	0.378543	0.1	0.180808	0.1	0.1	0.1	0.1	0.526667	0.342424	0.193333	0.433333	0.433333	0.310526	0.1	0.9	0.1	0.1	0.1	0.580192	0.118898	0.695745	0.166667	0.9	0.1	0.1	0.1	0.1	0.1	0.1	0.183582	0.404762	0.463636	0.105203	0.482464	0.124707
0.710226	0.223349	0.189965	0.381846	0.377073	0.10262	0.1	0.378543	0.1	0.180808	0.1	0.1	0.1	0.1	0.526667	0.342424	0.193333	0.433333	0.433333	0.310526	0.1	0.9	0.1	0.1	0.1	0.580192	0.118898	0.76383	0.166667	0.9	0.1	0.1	0.1	0.1	0.1	0.1	0.183582	0.404762	0.463636	0.105203	0.453081	0.107668
0.65639	0.300408	0.202068	0.343692	0.224878	0.1	0.1	0.666802	0.1	0.1	0.1	0.1	0.1	0.1	0.313333	0.245455	0.1	0.7	0.733333	0.184211	0.1	0.1	0.1	0.1	0.1	0.647419	0.104619	0.593617	0.233333	0.9	0.1	0.1	0.1	0.1	0.1	0.1	0.377612	0.404762	0.216364	0.102001	0.388626	0.278062
0.615271	0.573792	0.343268	0.100615	0.1	0.1	0.1	0.1	0.1	0.1	0.1	0.1	0.1	0.1	0.1	0.19697	0.1	0.513333	0.7205	0.198105	0.1	0.1	0.722222	0.113889	0.9	0.196038	0.118898	0.1	0.1	0.1	0.1	0.1	0.1	0.1	0.1	0.1	0.452239	0.709524	0.463636	0.13962	0.408531	0.580511
0.615271	0.573792	0.343268	0.100615	0.1	0.1	0.1	0.1	0.1	0.1	0.1	0.1	0.1	0.1	0.1	0.19697	0.1	0.513333	0.7205	0.215789	0.1	0.1	0.722222	0.113889	0.9	0.292077	0.118898	0.1	0.1	0.1	0.1	0.1	0.1	0.1	0.1	0.1	0.452239	0.709524	0.463636	0.13962	0.5	0.458679
0.615271	0.573792	0.343268	0.100615	0.1	0.1	0.1	0.1	0.1	0.1	0.1	0.1	0.1	0.1	0.1	0.19697	0.1	0.513333	0.7205	0.268421	0.1	0.1	0.722222	0.113889	0.9	0.484154	0.118898	0.1	0.1	0.1	0.1	0.1	0.1	0.1	0.1	0.1	0.452239	0.709524	0.463636	0.13962	0.637441	0.271246
0.615271	0.573792	0.343268	0.100615	0.1	0.1	0.1	0.1	0.1	0.1	0.1	0.1	0.1	0.1	0.1	0.19697	0.1	0.513333	0.7205	0.373684	0.1	0.1	0.722222	0.113889	0.9	0.67623	0.118898	0.1	0.1	0.1	0.1	0.1	0.1	0.1	0.1	0.1	0.452239	0.709524	0.463636	0.13962	0.858294	0.117891
0.609946	0.572703	0.480434	0.1	0.1	0.1	0.1	0.1	0.1	0.1	0.1	0.1	0.1	0.1	0.1	0.318182	0.1	0.513333	0.7205	0.198105	0.1	0.1	0.722222	0.108333	0.9	0.196038	0.118898	0.1	0.1	0.1	0.1	0.1	0.1	0.1	0.1	0.1	0.452239	0.709524	0.463636	0.13962	0.384834	0.582215
0.609946	0.572703	0.480434	0.1	0.1	0.1	0.1	0.1	0.1	0.1	0.1	0.1	0.1	0.1	0.1	0.318182	0.1	0.513333	0.7205	0.215789	0.1	0.1	0.722222	0.108333	0.9	0.292077	0.118898	0.1	0.1	0.1	0.1	0.1	0.1	0.1	0.1	0.1	0.452239	0.709524	0.463636	0.13962	0.445498	0.422897
0.609946	0.572703	0.480434	0.1	0.1	0.1	0.1	0.1	0.1	0.1	0.1	0.1	0.1	0.1	0.1	0.318182	0.1	0.513333	0.7205	0.268421	0.1	0.1	0.722222	0.108333	0.9	0.484154	0.118898	0.1	0.1	0.1	0.1	0.1	0.1	0.1	0.1	0.1	0.452239	0.709524	0.463636	0.13962	0.606635	0.16901
0.609946	0.572703	0.480434	0.1	0.1	0.1	0.1	0.1	0.1	0.1	0.1	0.1	0.1	0.1	0.1	0.318182	0.1	0.513333	0.7205	0.373684	0.1	0.1	0.722222	0.108333	0.9	0.67623	0.118898	0.1	0.1	0.1	0.1	0.1	0.1	0.1	0.1	0.1	0.452239	0.709524	0.463636	0.13962	0.761137	0.120447
0.567509	0.461607	0.173828	0.1	0.646341	0.484279	0.1	0.1	0.1	0.1	0.1	0.1	0.1	0.1	0.1	0.1	0.1	0.7	0.816667	0.1	0.1	0.1	0.1	0.1	0.1	0.1	0.874803	0.1	0.1	0.1	0.1	0.1	0.1	0.1	0.1	0.1	0.183582	0.17619	0.172727	0.106003	0.376777	0.422897
0.567509	0.461607	0.173828	0.1	0.646341	0.484279	0.1	0.1	0.1	0.1	0.1	0.1	0.1	0.1	0.1	0.1	0.1	0.7	0.816667	0.1	0.1	0.1	0.1	0.1	0.1	0.1	0.874803	0.219149	0.144444	0.1	0.1	0.1	0.1	0.1	0.1	0.1	0.183582	0.17619	0.172727	0.106003	0.537441	0.525133
0.567509	0.461607	0.173828	0.1	0.646341	0.484279	0.1	0.1	0.1	0.1	0.1	0.1	0.1	0.1	0.1	0.1	0.1	0.7	0.816667	0.1	0.1	0.1	0.1	0.1	0.1	0.1	0.874803	0.389362	0.144444	0.1	0.1	0.1	0.1	0.1	0.1	0.1	0.183582	0.17619	0.172727	0.106003	0.583412	0.576251
0.567509	0.461607	0.173828	0.1	0.646341	0.484279	0.1	0.1	0.1	0.1	0.1	0.1	0.1	0.1	0.1	0.1	0.1	0.7	0.816667	0.1	0.1	0.1	0.1	0.1	0.1	0.1	0.874803	0.437021	0.144444	0.1	0.1	0.1	0.1	0.1	0.1	0.1	0.183582	0.17619	0.172727	0.106003	0.577725	0.576251
0.567509	0.461607	0.173828	0.1	0.646341	0.484279	0.1	0.1	0.1	0.1	0.1	0.1	0.1	0.1	0.1	0.1	0.1	0.7	0.816667	0.1	0.1	0.1	0.1	0.1	0.1	0.1	0.874803	0.661702	0.122222	0.1	0.1	0.1	0.1	0.1	0.1	0.1	0.183582	0.17619	0.172727	0.106003	0.453555	0.508094
0.120758	0.856433	0.678114	0.783077	0.1	0.545415	0.1	0.1	0.1	0.1	0.1	0.1	0.1	0.1	0.1	0.1	0.1	0.766667	0.646667	0.563158	0.1	0.9	0.1	0.1	0.1	0.1	0.789134	0.1	0.1	0.1	0.1	0.1	0.1	0.1	0.1	0.1	0.228358	0.252381	0.318182	0.107604	0.38673	0.525133
0.120758	0.856433	0.678114	0.783077	0.1	0.545415	0.1	0.1	0.1	0.1	0.1	0.1	0.1	0.1	0.1	0.1	0.1	0.766667	0.646667	0.563158	0.1	0.9	0.1	0.1	0.1	0.1	0.789134	0.831915	0.166667	0.1	0.1	0.1	0.1	0.1	0.1	0.1	0.228358	0.252381	0.318182	0.107604	0.325592	0.657188
0.143502	0.829204	0.774937	0.764615	0.1	0.527948	0.1	0.1	0.1	0.1	0.1	0.1	0.1	0.1	0.1	0.1	0.1	0.766667	0.646667	0.563158	0.1	0.9	0.1	0.1	0.1	0.1	0.789134	0.1	0.1	0.1	0.1	0.1	0.1	0.1	0.1	0.1	0.228358	0.252381	0.318182	0.107604	0.435545	0.407561
0.143502	0.829204	0.774937	0.764615	0.1	0.527948	0.1	0.1	0.1	0.1	0.1	0.1	0.1	0.1	0.1	0.1	0.1	0.766667	0.646667	0.563158	0.1	0.9	0.1	0.1	0.1	0.1	0.789134	0.831915	0.166667	0.1	0.1	0.1	0.1	0.1	0.1	0.1	0.228358	0.252381	0.318182	0.107604	0.376777	0.551544
0.723827	0.164806	0.21417	0.223077	0.1	0.1	0.1	0.9	0.766667	0.746465	0.1	0.1	0.1	0.366667	0.1	0.1	0.1	0.766667	0.808333	0.247368	0.1	0.633333	0.558667	0.266667	0.1	0.609004	0.109659	0.539149	0.233333	0.1	0.1	0.1	0.1	0.1	0.1	0.1	0.377612	0.404762	0.303636	0.107604	0.443602	0.347923
0.723827	0.164806	0.21417	0.223077	0.1	0.1	0.1	0.9	0.766667	0.746465	0.1	0.1	0.1	0.366667	0.1	0.1	0.1	0.766667	0.808333	0.247368	0.1	0.633333	0.558667	0.266667	0.1	0.609004	0.109659	0.559574	0.122222	0.1	0.1	0.1	0.1	0.1	0.1	0.1	0.377612	0.404762	0.303636	0.107604	0.446919	0.241427
0.723827	0.164806	0.21417	0.223077	0.1	0.1	0.1	0.9	0.766667	0.746465	0.1	0.1	0.1	0.366667	0.1	0.1	0.1	0.766667	0.808333	0.247368	0.1	0.633333	0.558667	0.266667	0.1	0.609004	0.109659	0.593617	0.122222	0.1	0.1	0.1	0.1	0.1	0.1	0.1	0.377612	0.404762	0.303636	0.107604	0.718483	0.174121
0.828339	0.193397	0.181896	0.192308	0.205366	0.1	0.1	0.1	0.1	0.1	0.532	0.1	0.1	0.1	0.1	0.1	0.1	0.766667	0.71	0.310526	0.1	0.9	0.601333	0.111111	0.9	0.772269	0.108819	0.1	0.1	0.1	0.1	0.1	0.1	0.1	0.1	0.1	0.750746	0.861905	0.289091	0.104962	0.794787	0.110224
0.828339	0.193397	0.181896	0.192308	0.205366	0.1	0.1	0.1	0.1	0.1	0.532	0.1	0.1	0.1	0.1	0.1	0.1	0.766667	0.71	0.310526	0.1	0.9	0.601333	0.111111	0.9	0.772269	0.108819	0.545957	0.133333	0.9	0.1	0.1	0.1	0.1	0.1	0.1	0.750746	0.861905	0.289091	0.104962	0.24218	0.308733
0.828339	0.193397	0.181896	0.192308	0.205366	0.1	0.1	0.1	0.1	0.1	0.532	0.1	0.1	0.1	0.1	0.1	0.1	0.766667	0.71	0.310526	0.1	0.9	0.601333	0.111111	0.9	0.772269	0.108819	0.559574	0.133333	0.9	0.1	0.1	0.1	0.1	0.1	0.1	0.750746	0.861905	0.289091	0.104962	0.28673	0.412673
0.828339	0.193397	0.181896	0.192308	0.205366	0.1	0.1	0.1	0.1	0.1	0.532	0.1	0.1	0.1	0.1	0.1	0.1	0.766667	0.71	0.310526	0.1	0.9	0.601333	0.111111	0.9	0.772269	0.108819	0.573191	0.133333	0.9	0.1	0.1	0.1	0.1	0.1	0.1	0.750746	0.861905	0.289091	0.104962	0.388626	0.339404
0.828339	0.193397	0.181896	0.192308	0.205366	0.1	0.1	0.1	0.1	0.1	0.532	0.1	0.1	0.1	0.1	0.1	0.1	0.766667	0.71	0.310526	0.1	0.9	0.601333	0.111111	0.9	0.772269	0.108819	0.586809	0.133333	0.9	0.1	0.1	0.1	0.1	0.1	0.1	0.750746	0.861905	0.289091	0.104962	0.445972	0.252503
0.828339	0.193397	0.181896	0.192308	0.205366	0.1	0.1	0.1	0.1	0.1	0.532	0.1	0.1	0.1	0.1	0.1	0.1	0.766667	0.71	0.310526	0.1	0.9	0.601333	0.111111	0.9	0.772269	0.108819	0.600426	0.133333	0.9	0.1	0.1	0.1	0.1	0.1	0.1	0.750746	0.861905	0.289091	0.104962	0.532227	0.194569
0.779693	0.213002	0.296873	0.269231	0.394634	0.1	0.1	0.1	0.1	0.1	0.1	0.1	0.1	0.1	0.153333	0.148485	0.18	0.566667	0.725	0.121053	0.1	0.9	0.1	0.1	0.1	0.1	0.828609	0.593617	0.122222	0.1	0.1	0.1	0.1	0.1	0.1	0.1	0.28806	0.17619	0.245455	0.107604	0.396209	0.746645
0.779693	0.213002	0.296873	0.269231	0.394634	0.1	0.1	0.1	0.1	0.1	0.1	0.1	0.1	0.1	0.153333	0.148485	0.18	0.566667	0.725	0.121053	0.9	0.1	0.508889	0.116667	0.366667	0.1	0.828609	0.593617	0.122222	0.1	0.1	0.1	0.1	0.1	0.1	0.1	0.28806	0.17619	0.245455	0.107604	0.443602	0.687007
0.681321	0.349966	0.173828	0.315385	0.334146	0.1	0.1	0.1	0.1	0.1	0.1	0.1	0.1	0.357778	0.1	0.1	0.228	0.833333	0.85	0.163158	0.1	0.1	0.1	0.1	0.1	0.1	0.891601	0.1	0.1	0.1	0.1	0.1	0.1	0.1	0.1	0.1	0.377612	0.42381	0.390909	0.104962	0.635735	0.209904
0.681321	0.349966	0.173828	0.315385	0.334146	0.1	0.1	0.1	0.1	0.1	0.1	0.1	0.1	0.357778	0.1	0.1	0.228	0.833333	0.85	0.163158	0.1	0.1	0.1	0.1	0.1	0.1	0.891601	0.389362	0.166667	0.1	0.1	0.1	0.1	0.1	0.1	0.1	0.377612	0.42381	0.390909	0.104962	0.563507	0.26443
0.681321	0.349966	0.173828	0.315385	0.334146	0.1	0.1	0.1	0.1	0.1	0.1	0.1	0.1	0.357778	0.1	0.1	0.228	0.833333	0.85	0.163158	0.1	0.1	0.1	0.1	0.1	0.1	0.891601	0.593617	0.166667	0.1	0.1	0.1	0.1	0.1	0.1	0.1	0.377612	0.42381	0.390909	0.104962	0.468341	0.284026
0.689711	0.30177	0.254513	0.475385	0.1	0.1	0.1	0.1	0.1	0.1	0.1	0.1	0.1	0.1	0.1	0.1	0.1	0.7	0.808333	0.247368	0.1	0.1	0.1	0.1	0.1	0.1	0.870604	0.62766	0.166667	0.1	0.1	0.1	0.1	0.1	0.1	0.1	0.750746	0.9	0.681818	0.107604	0.233175	0.559212
0.785921	0.246494	0.173828	0.284615	0.1	0.1	0.1	0.1	0.1	0.1	0.1	0.1	0.1	0.1	0.1	0.1	0.1	0.833333	0.683333	0.247368	0.1	0.1	0.1	0.1	0.1	0.1	0.807612	0.586809	0.166667	0.1	0.1	0.1	0.1	0.1	0.1	0.1	0.377612	0.328571	0.201818	0.1004	0.355924	0.405857
0.77509	0.246494	0.173828	0.284615	0.217073	0.1	0.1	0.1	0.1	0.1	0.1	0.1	0.1	0.1	0.1	0.1	0.1	0.833333	0.683333	0.247368	0.1	0.1	0.1	0.1	0.1	0.1	0.807612	0.586809	0.166667	0.1	0.1	0.1	0.1	0.1	0.1	0.1	0.377612	0.328571	0.201818	0.1004	0.280095	0.6623
0.248014	0.9	0.496571	0.592308	0.1	0.1	0.1	0.1	0.1	0.1	0.1	0.1	0.1	0.1	0.1	0.1	0.1	0.833333	0.7205	0.268421	0.1	0.1	0.1	0.1	0.1	0.1	0.826341	0.797872	0.233333	0.9	0.1	0.1	0.1	0.1	0.1	0.1	0.198507	0.328571	0.318182	0.1004	0.235545	0.584771
0.248014	0.9	0.496571	0.592308	0.1	0.1	0.1	0.1	0.1	0.1	0.1	0.1	0.1	0.1	0.1	0.1	0.1	0.833333	0.7205	0.268421	0.1	0.1	0.1	0.1	0.1	0.1	0.826341	0.797872	0.233333	0.9	0.1	0.1	0.1	0.1	0.1	0.1	0.198507	0.328571	0.318182	0.107604	0.248815	0.695527
0.776895	0.295507	0.149622	0.201538	0.1	0.1	0.1	0.1	0.1	0.1	0.1	0.9	0.1	0.1	0.1	0.1	0.1	0.833333	0.711667	0.226316	0.1	0.1	0.544444	0.133333	0.1	0.532173	0.112178	0.545957	0.111111	0.1	0.1	0.1	0.1	0.1	0.1	0.1	0.750746	0.9	0.347273	0.104402	0.44455	0.414377
0.776895	0.295507	0.149622	0.201538	0.1	0.1	0.1	0.1	0.1	0.1	0.1	0.9	0.1	0.1	0.1	0.1	0.1	0.833333	0.711667	0.226316	0.1	0.1	0.544444	0.133333	0.1	0.532173	0.112178	0.545957	0.122222	0.1	0.1	0.1	0.1	0.1	0.1	0.1	0.750746	0.9	0.347273	0.104402	0.481517	0.533653
0.776895	0.295507	0.149622	0.201538	0.1	0.1	0.1	0.1	0.1	0.1	0.1	0.9	0.1	0.1	0.1	0.1	0.1	0.833333	0.711667	0.226316	0.1	0.1	0.544444	0.133333	0.1	0.532173	0.112178	0.545957	0.166667	0.1	0.1	0.1	0.1	0.1	0.1	0.1	0.750746	0.9	0.347273	0.104402	0.458294	0.286581
0.776895	0.295507	0.149622	0.201538	0.1	0.1	0.1	0.1	0.1	0.1	0.1	0.9	0.1	0.1	0.1	0.1	0.1	0.833333	0.711667	0.226316	0.1	0.1	0.544444	0.133333	0.1	0.532173	0.112178	0.545957	0.366667	0.1	0.1	0.1	0.1	0.1	0.1	0.1	0.750746	0.9	0.347273	0.104402	0.452133	0.226944
0.708484	0.276991	0.11412	0.185538	0.373171	0.1	0.1	0.32996	0.766667	0.734343	0.1	0.1	0.1	0.1	0.228	0.463636	0.393333	0.833333	0.9	0.142105	0.1	0.1	0.1	0.1	0.1	0.580192	0.1021	0.525532	0.166667	0.1	0.1	0.1	0.1	0.1	0.1	0.1	0.183582	0.1	0.172727	0.107604	0.384834	0.152822
0.708484	0.276991	0.11412	0.185538	0.373171	0.1	0.1	0.32996	0.766667	0.734343	0.1	0.1	0.1	0.1	0.228	0.463636	0.393333	0.833333	0.9	0.142105	0.1	0.1	0.1	0.1	0.1	0.580192	0.1021	0.545957	0.166667	0.1	0.1	0.1	0.1	0.1	0.1	0.1	0.183582	0.1	0.172727	0.107604	0.366351	0.123855
0.724368	0.364125	0.165759	0.229846	0.1	0.1	0.1	0.1	0.1	0.1	0.1	0.1	0.1	0.1	0.1	0.1	0.1	0.833333	0.711667	0.226316	0.9	0.1	0.508889	0.133333	0.1	0.772269	0.10378	0.491489	0.166667	0.9	0.1	0.1	0.1	0.1	0.1	0.1	0.153731	0.252381	0.201818	0.102801	0.374882	0.355591
0.69278	0.361402	0.153656	0.223692	0.1	0.1	0.1	0.1	0.1	0.9	0.1	0.1	0.1	0.1	0.1	0.1	0.1	0.833333	0.711667	0.226316	0.9	0.1	0.508889	0.133333	0.1	0.772269	0.10378	0.491489	0.166667	0.9	0.1	0.1	0.1	0.1	0.1	0.1	0.153731	0.252381	0.201818	0.102801	0.395261	0.350479
0.824729	0.219265	0.173828	0.192308	0.119512	0.1	0.9	0.1	0.1	0.1	0.14	0.1	0.1	0.1	0.1	0.1	0.1	0.7	0.85	0.184211	0.1	0.1	0.1	0.1	0.1	0.1	0.891601	0.552766	0.766667	0.1	0.1	0.1	0.1	0.1	0.1	0.1	0.750746	0.861905	0.463636	0.115608	0.344076	0.366667
0.824729	0.219265	0.173828	0.192308	0.119512	0.1	0.9	0.1	0.1	0.1	0.14	0.1	0.1	0.1	0.1	0.1	0.1	0.7	0.85	0.184211	0.1	0.1	0.1	0.1	0.1	0.1	0.891601	0.559574	0.766667	0.1	0.1	0.1	0.1	0.1	0.1	0.1	0.750746	0.861905	0.463636	0.115608	0.355924	0.444196
0.824729	0.219265	0.173828	0.192308	0.119512	0.1	0.9	0.1	0.1	0.1	0.14	0.1	0.1	0.1	0.1	0.1	0.1	0.7	0.85	0.184211	0.1	0.1	0.1	0.1	0.1	0.1	0.891601	0.566383	0.766667	0.1	0.1	0.1	0.1	0.1	0.1	0.1	0.750746	0.861905	0.463636	0.115608	0.379621	0.291693
0.646209	0.386726	0.121382	0.444615	0.123415	0.1	0.1	0.1	0.1	0.1	0.1	0.1	0.1	0.1	0.1	0.1	0.1	0.833333	0.7205	0.310526	0.1	0.1	0.1	0.1	0.1	0.772269	0.110499	0.9	0.106667	0.9	0.1	0.1	0.1	0.1	0.1	0.1	0.302985	0.328571	0.318182	0.17964	0.194787	0.406709
0.646209	0.386726	0.121382	0.444615	0.123415	0.1	0.1	0.1	0.1	0.1	0.1	0.1	0.1	0.1	0.1	0.1	0.1	0.833333	0.7205	0.310526	0.1	0.1	0.1	0.1	0.1	0.772269	0.110499	0.9	0.111111	0.9	0.1	0.1	0.1	0.1	0.1	0.1	0.302985	0.328571	0.318182	0.17964	0.111848	0.310011
0.646209	0.386726	0.121382	0.444615	0.123415	0.1	0.1	0.1	0.1	0.1	0.1	0.1	0.1	0.1	0.1	0.1	0.1	0.833333	0.7205	0.310526	0.1	0.1	0.1	0.1	0.1	0.772269	0.110499	0.9	0.122222	0.9	0.1	0.1	0.1	0.1	0.1	0.1	0.302985	0.328571	0.318182	0.17964	0.109479	0.310437
0.803971	0.300953	0.173828	0.1	0.1	0.1	0.1	0.1	0.1	0.1	0.1	0.1	0.1	0.1	0.1	0.1	0.1	0.833333	0.711667	0.226316	0.1	0.1	0.1	0.1	0.1	0.1	0.82189	0.525532	0.233333	0.9	0.1	0.1	0.1	0.1	0.1	0.1	0.377612	0.404762	0.609091	0.115608	0.570142	0.327476
0.776895	0.300953	0.173828	0.192308	0.1	0.1	0.1	0.1	0.1	0.1	0.1	0.1	0.1	0.1	0.1	0.1	0.1	0.833333	0.711667	0.226316	0.1	0.1	0.1	0.1	0.1	0.1	0.82189	0.545957	0.233333	0.9	0.1	0.1	0.1	0.1	0.1	0.1	0.377612	0.404762	0.609091	0.115608	0.496209	0.388818
0.749819	0.300953	0.173828	0.284615	0.1	0.1	0.1	0.1	0.1	0.1	0.1	0.1	0.1	0.1	0.1	0.1	0.1	0.833333	0.711667	0.226316	0.1	0.1	0.1	0.1	0.1	0.1	0.82189	0.559574	0.233333	0.9	0.1	0.1	0.1	0.1	0.1	0.1	0.377612	0.404762	0.609091	0.115608	0.306635	0.461235
0.810686	0.279714	0.130661	0.1008	0.19561	0.1	0.1	0.1	0.1	0.1	0.1	0.1	0.1	0.1	0.153333	0.269697	0.1	0.7	0.7205	0.184211	0.1	0.1	0.1	0.1	0.1	0.1	0.826341	0.1	0.1	0.1	0.1	0.1	0.1	0.1	0.1	0.1	0.377612	0.427619	0.463636	0.107604	0.456398	0.289137
0.810686	0.279714	0.130661	0.1008	0.19561	0.1	0.1	0.1	0.1	0.1	0.1	0.1	0.1	0.1	0.153333	0.269697	0.1	0.7	0.7205	0.184211	0.1	0.1	0.1	0.1	0.1	0.628211	0.105879	0.518723	0.166667	0.1	0.1	0.1	0.1	0.1	0.1	0.1	0.377612	0.427619	0.238182	0.107604	0.536967	0.267838
0.6	0.409871	0.294856	0.530769	0.1	0.1	0.1	0.1	0.1	0.1	0.1	0.1	0.1	0.1	0.1	0.1	0.1	0.7	0.85	0.175789	0.9	0.1	0.544444	0.133333	0.1	0.580192	0.105459	0.648085	0.122222	0.1	0.1	0.1	0.1	0.1	0.1	0.1	0.377612	0.404762	0.216364	0.1004	0.298578	0.368371
0.598195	0.409871	0.294856	0.530769	0.1	0.1	0.1	0.1	0.1	0.1	0.1	0.1	0.1	0.188889	0.1	0.1	0.1	0.7	0.85	0.175789	0.9	0.1	0.544444	0.133333	0.1	0.580192	0.105459	0.648085	0.122222	0.1	0.1	0.1	0.1	0.1	0.1	0.1	0.377612	0.404762	0.216364	0.1004	0.297156	0.315548
0.581949	0.409871	0.294856	0.530769	0.1	0.1	0.1	0.1	0.1	0.50404	0.1	0.1	0.1	0.1	0.1	0.1	0.1	0.7	0.85	0.175789	0.9	0.1	0.544444	0.133333	0.1	0.580192	0.105459	0.648085	0.122222	0.1	0.1	0.1	0.1	0.1	0.1	0.1	0.377612	0.404762	0.216364	0.1004	0.300474	0.328328
0.9	0.114432	0.153656	0.111077	0.158537	0.117467	0.1	0.180972	0.233333	0.1	0.1	0.1	0.1	0.366667	0.1	0.1	0.1	0.833333	0.816667	0.310526	0.1	0.1	0.224444	0.100056	0.1	0.1	0.874803	0.76383	0.166667	0.9	0.1	0.1	0.1	0.1	0.1	0.1	0.377612	0.404762	0.9	0.107604	0.506777	0.197295
0.693863	0.328182	0.21417	0.407692	0.1	0.1	0.1	0.1	0.1	0.1	0.1	0.1	0.1	0.1	0.1	0.1	0.1	0.7	0.655	0.478947	0.1	0.366667	0.1	0.1	0.1	0.1	0.793333	0.831915	0.233333	0.9	0.1	0.1	0.1	0.1	0.1	0.1	0.1	0.138095	0.318182	0.107604	0.29763	0.115335
0.693863	0.328182	0.21417	0.407692	0.1	0.1	0.1	0.1	0.1	0.1	0.1	0.1	0.1	0.1	0.1	0.1	0.1	0.7	0.655	0.478947	0.1	0.366667	0.1	0.1	0.1	0.1	0.793333	0.831915	0.233333	0.9	0.1	0.1	0.1	0.343478	0.5	0.9	0.1	0.138095	0.318182	0.107604	0.433649	0.14771
0.684838	0.358679	0.218205	0.334462	0.209268	0.1	0.1	0.1	0.1	0.1	0.1	0.1	0.1	0.1	0.1	0.1	0.1	0.833333	0.828333	0.142105	0.1	0.1	0.58	0.133333	0.9	0.580192	0.1021	0.593617	0.122222	0.9	0.1	0.1	0.1	0.1	0.1	0.1	0.377612	0.404762	0.172727	0.13962	0.329858	0.423749
0.684838	0.358679	0.218205	0.334462	0.209268	0.1	0.1	0.1	0.1	0.1	0.1	0.1	0.1	0.1	0.1	0.1	0.1	0.833333	0.828333	0.142105	0.1	0.1	0.58	0.133333	0.9	0.580192	0.1021	0.62766	0.122222	0.9	0.1	0.1	0.1	0.1	0.1	0.1	0.377612	0.404762	0.172727	0.13962	0.371564	0.62311
0.684838	0.358679	0.218205	0.334462	0.209268	0.1	0.1	0.1	0.1	0.1	0.1	0.1	0.1	0.1	0.1	0.1	0.1	0.833333	0.828333	0.142105	0.1	0.1	0.58	0.133333	0.9	0.580192	0.1021	0.661702	0.122222	0.9	0.1	0.1	0.1	0.1	0.1	0.1	0.377612	0.404762	0.172727	0.13962	0.373934	0.297657
0.809386	0.246494	0.173828	0.161538	0.1	0.1	0.1	0.1	0.366667	0.1	0.5	0.1	0.1	0.1	0.1	0.1	0.1	0.166667	0.866667	0.121053	0.1	0.1	0.1	0.1	0.1	0.1	0.9	0.525532	0.233333	0.1	0.1	0.1	0.1	0.1	0.1	0.1	0.377612	0.404762	0.245455	0.13962	0.618957	0.32918
0.809386	0.246494	0.173828	0.161538	0.1	0.1	0.1	0.1	0.366667	0.1	0.5	0.1	0.1	0.1	0.1	0.1	0.1	0.166667	0.866667	0.121053	0.1	0.1	0.1	0.1	0.1	0.1	0.9	0.525532	0.233333	0.1	0.1	0.1	0.1	0.1	0.1	0.1	0.377612	0.404762	0.245455	0.13962	0.609479	0.354739
0.809386	0.246494	0.173828	0.161538	0.1	0.1	0.1	0.1	0.366667	0.1	0.5	0.1	0.1	0.1	0.1	0.1	0.1	0.166667	0.866667	0.121053	0.1	0.1	0.1	0.1	0.1	0.1	0.9	0.525532	0.233333	0.1	0.1	0.1	0.1	0.1	0.1	0.1	0.377612	0.404762	0.245455	0.13962	0.6109	0.397338
0.809386	0.246494	0.173828	0.161538	0.1	0.1	0.1	0.1	0.366667	0.1	0.5	0.1	0.1	0.1	0.1	0.1	0.1	0.166667	0.866667	0.121053	0.1	0.1	0.1	0.1	0.1	0.1	0.9	0.525532	0.233333	0.1	0.1	0.1	0.1	0.1	0.1	0.1	0.377612	0.404762	0.245455	0.13962	0.667299	0.295101
0.743321	0.306127	0.177862	0.294462	0.1	0.1	0.1	0.1	0.1	0.1	0.1	0.1	0.1	0.1	0.1	0.1	0.1	0.7	0.7205	0.205263	0.1	0.1	0.295556	0.116667	0.1	0.67623	0.105459	0.539149	0.166667	0.9	0.1	0.1	0.1	0.1	0.1	0.1	0.377612	0.404762	0.201818	0.107604	0.299526	0.251651
0.743321	0.306127	0.177862	0.294462	0.1	0.1	0.1	0.1	0.1	0.1	0.1	0.1	0.1	0.1	0.1	0.1	0.1	0.7	0.7205	0.205263	0.1	0.1	0.295556	0.116667	0.1	0.67623	0.105459	0.559574	0.166667	0.9	0.1	0.1	0.1	0.1	0.1	0.1	0.377612	0.404762	0.201818	0.107604	0.302844	0.356443
0.743321	0.306127	0.177862	0.294462	0.1	0.1	0.1	0.1	0.1	0.1	0.1	0.1	0.1	0.1	0.1	0.1	0.1	0.7	0.7205	0.205263	0.1	0.1	0.295556	0.116667	0.1	0.67623	0.105459	0.58	0.166667	0.9	0.1	0.1	0.1	0.1	0.1	0.1	0.377612	0.404762	0.201818	0.107604	0.339336	0.387114
0.749097	0.303131	0.173828	0.271077	0.1	0.1	0.1	0.1	0.1	0.1	0.1	0.1	0.1	0.26	0.1	0.1	0.1	0.7	0.7205	0.205263	0.1	0.1	0.295556	0.116667	0.1	0.67623	0.105459	0.539149	0.166667	0.9	0.1	0.1	0.1	0.1	0.1	0.1	0.377612	0.404762	0.201818	0.107604	0.380569	0.230351
0.749097	0.303131	0.173828	0.271077	0.1	0.1	0.1	0.1	0.1	0.1	0.1	0.1	0.1	0.26	0.1	0.1	0.1	0.7	0.7205	0.205263	0.1	0.1	0.295556	0.116667	0.1	0.67623	0.105459	0.559574	0.166667	0.9	0.1	0.1	0.1	0.1	0.1	0.1	0.377612	0.404762	0.201818	0.107604	0.348341	0.362407
0.749097	0.303131	0.173828	0.271077	0.1	0.1	0.1	0.1	0.1	0.1	0.1	0.1	0.1	0.26	0.1	0.1	0.1	0.7	0.7205	0.205263	0.1	0.1	0.295556	0.116667	0.1	0.67623	0.105459	0.58	0.166667	0.9	0.1	0.1	0.1	0.1	0.1	0.1	0.377612	0.404762	0.201818	0.107604	0.402844	0.410117
0.71065	0.388087	0.181896	0.22	0.1	0.1	0.1	0.1	0.1	0.1	0.1	0.1	0.1	0.1	0.1	0.1	0.1	0.833333	0.716667	0.226316	0.1	0.1	0.1	0.1	0.1	0.820288	0.1021	0.525532	0.111111	0.9	0.1	0.1	0.1	0.1	0.1	0.1	0.377612	0.9	0.172727	0.101201	0.562085	0.416933
0.71065	0.388087	0.181896	0.22	0.1	0.1	0.1	0.1	0.1	0.1	0.1	0.1	0.1	0.1	0.1	0.1	0.1	0.833333	0.716667	0.226316	0.1	0.1	0.1	0.1	0.1	0.820288	0.1021	0.525532	0.111111	0.9	0.1	0.1	0.1	0.1	0.1	0.1	0.377612	0.9	0.172727	0.115608	0.467773	0.415229
0.829964	0.198843	0.161725	0.231692	0.1	0.1	0.1	0.1	0.1	0.1	0.26	0.1	0.1	0.1	0.1	0.1	0.1	0.766667	0.821667	0.184211	0.1	0.9	0.366667	0.100056	0.1	0.1	0.877323	0.576596	0.166667	0.1	0.1	0.1	0.1	0.1	0.1	0.1	0.377612	0.404762	0.463636	0.107604	0.354028	0.38541
0.820397	0.194214	0.169793	0.230462	0.1	0.1	0.1	0.1	0.1	0.1	0.82	0.1	0.1	0.1	0.1	0.1	0.1	0.766667	0.821667	0.184211	0.1	0.9	0.366667	0.100056	0.1	0.1	0.877323	0.576596	0.166667	0.1	0.1	0.1	0.1	0.1	0.1	0.1	0.377612	0.404762	0.463636	0.107604	0.382464	0.335996
0.65657	0.300408	0.198033	0.343692	0.224878	0.1	0.1	0.666802	0.1	0.1	0.1	0.1	0.1	0.1	0.313333	0.245455	0.1	0.9	0.733333	0.184211	0.1	0.1	0.1	0.1	0.1	0.647419	0.104619	0.600426	0.233333	0.9	0.1	0.1	0.1	0.1	0.1	0.1	0.377612	0.404762	0.216364	0.102001	0.359242	0.332588
0.65657	0.300408	0.198033	0.343692	0.224878	0.1	0.1	0.666802	0.1	0.1	0.1	0.1	0.1	0.1	0.313333	0.245455	0.1	0.9	0.733333	0.184211	0.1	0.1	0.1	0.1	0.1	0.647419	0.104619	0.62766	0.233333	0.9	0.1	0.1	0.1	0.1	0.1	0.1	0.377612	0.404762	0.216364	0.102001	0.274408	0.561768
0.65657	0.300408	0.198033	0.343692	0.224878	0.1	0.1	0.666802	0.1	0.1	0.1	0.1	0.1	0.1	0.313333	0.245455	0.1	0.9	0.733333	0.184211	0.1	0.1	0.1	0.1	0.1	0.647419	0.104619	0.654894	0.233333	0.9	0.1	0.1	0.1	0.1	0.1	0.1	0.377612	0.404762	0.216364	0.102001	0.254028	0.295101
0.770578	0.189312	0.234342	0.456923	0.1	0.1	0.1	0.1	0.1	0.1	0.1	0.1	0.1	0.1	0.1	0.1	0.1	0.833333	0.766667	0.205263	0.9	0.1	0.58	0.133333	0.1	0.705042	0.104619	0.62766	0.105556	0.1	0.1	0.1	0.1	0.621739	0.12	0.1	0.302985	0.328571	0.216364	0.106003	0.291943	0.422897
0.425632	0.528591	0.432022	0.650154	0.689268	0.1	0.1	0.1	0.1	0.1	0.1	0.1	0.1	0.1	0.1	0.1	0.1	0.806667	0.866667	0.238947	0.1	0.9	0.793333	0.133333	0.9	0.839496	0.1021	0.76383	0.133333	0.1	0.1	0.1	0.1	0.1	0.1	0.1	0.377612	0.709524	0.172727	0.107604	0.369668	0.405857
0.679242	0.325459	0.117347	0.179385	0.1	0.1	0.1	0.569636	0.1	0.891919	0.1	0.1	0.1	0.1	0.1	0.1	0.1	0.766667	0.733333	0.209474	0.1	0.1	0.1	0.1	0.1	0.1	0.832808	0.831915	0.133333	0.9	0.1	0.1	0.1	0.1	0.1	0.1	0.228358	0.328571	0.463636	0.123612	0.420379	0.238019
0.760108	0.27917	0.177862	0.298154	0.1	0.1	0.1	0.1	0.1	0.1	0.1	0.1	0.1	0.1	0.1	0.1	0.1	0.766667	0.733333	0.184211	0.1	0.1	0.1	0.1	0.1	0.1	0.832808	0.525532	0.233333	0.9	0.1	0.1	0.1	0.343478	0.233333	0.1	0.123881	0.1	0.172727	0.13962	0.336019	0.263578
0.760108	0.27917	0.177862	0.298154	0.1	0.1	0.1	0.1	0.1	0.1	0.1	0.1	0.1	0.1	0.1	0.1	0.1	0.766667	0.733333	0.184211	0.1	0.1	0.1	0.1	0.1	0.1	0.832808	0.559574	0.233333	0.9	0.1	0.1	0.1	0.343478	0.233333	0.1	0.123881	0.1	0.172727	0.13962	0.303791	0.446752
0.760108	0.27917	0.177862	0.298154	0.1	0.1	0.1	0.1	0.1	0.1	0.1	0.1	0.1	0.1	0.1	0.1	0.1	0.766667	0.733333	0.184211	0.1	0.1	0.1	0.1	0.1	0.1	0.832808	0.593617	0.233333	0.9	0.1	0.1	0.1	0.343478	0.233333	0.1	0.123881	0.1	0.172727	0.13962	0.408531	0.523429
0.760108	0.27917	0.177862	0.298154	0.1	0.1	0.1	0.1	0.1	0.1	0.1	0.1	0.1	0.1	0.1	0.1	0.1	0.766667	0.733333	0.184211	0.1	0.1	0.1	0.1	0.1	0.1	0.832808	0.62766	0.233333	0.9	0.1	0.1	0.1	0.343478	0.233333	0.1	0.123881	0.1	0.172727	0.13962	0.601422	0.317252
0.75343	0.27917	0.177862	0.298154	0.1	0.121834	0.1	0.1	0.26	0.1	0.1	0.1	0.1	0.1	0.1	0.1	0.1	0.766667	0.733333	0.184211	0.1	0.1	0.1	0.1	0.1	0.1	0.832808	0.525532	0.233333	0.9	0.1	0.1	0.1	0.1	0.1	0.1	0.123881	0.1	0.172727	0.13962	0.373934	0.287433
0.75343	0.27917	0.177862	0.298154	0.1	0.121834	0.1	0.1	0.26	0.1	0.1	0.1	0.1	0.1	0.1	0.1	0.1	0.766667	0.733333	0.184211	0.1	0.1	0.1	0.1	0.1	0.1	0.832808	0.559574	0.233333	0.9	0.1	0.1	0.1	0.1	0.1	0.1	0.123881	0.1	0.172727	0.13962	0.345024	0.425453
0.75343	0.27917	0.177862	0.298154	0.1	0.121834	0.1	0.1	0.26	0.1	0.1	0.1	0.1	0.1	0.1	0.1	0.1	0.766667	0.733333	0.184211	0.1	0.1	0.1	0.1	0.1	0.1	0.832808	0.593617	0.233333	0.9	0.1	0.1	0.1	0.1	0.1	0.1	0.123881	0.1	0.172727	0.13962	0.48436	0.50639
0.75343	0.27917	0.177862	0.298154	0.1	0.121834	0.1	0.1	0.26	0.1	0.1	0.1	0.1	0.1	0.1	0.1	0.1	0.766667	0.733333	0.184211	0.1	0.1	0.1	0.1	0.1	0.1	0.832808	0.62766	0.233333	0.9	0.1	0.1	0.1	0.1	0.1	0.1	0.123881	0.1	0.172727	0.13962	0.627488	0.318956
0.806318	0.252485	0.206102	0.1	0.406341	0.1	0.1	0.1	0.1	0.1	0.1	0.1	0.1	0.1	0.1	0.1	0.1	0.7	0.85	0.184211	0.1	0.366667	0.530222	0.9	0.1	0.1	0.891601	0.539149	0.122222	0.1	0.1	0.1	0.1	0.1	0.1	0.1	0.750746	0.9	0.463636	0.104962	0.449763	0.349627
0.806318	0.252485	0.206102	0.1	0.406341	0.1	0.1	0.1	0.1	0.1	0.1	0.1	0.1	0.1	0.1	0.1	0.1	0.7	0.85	0.184211	0.1	0.366667	0.530222	0.9	0.1	0.292077	0.113858	0.539149	0.122222	0.1	0.1	0.1	0.1	0.1	0.1	0.1	0.750746	0.9	0.376364	0.104962	0.445024	0.39819
0.806318	0.252485	0.206102	0.1	0.406341	0.1	0.1	0.1	0.1	0.1	0.1	0.1	0.1	0.1	0.1	0.1	0.1	0.7	0.85	0.184211	0.1	0.366667	0.530222	0.9	0.1	0.484154	0.108819	0.539149	0.122222	0.1	0.1	0.1	0.1	0.1	0.1	0.1	0.750746	0.9	0.289091	0.104962	0.516114	0.338552
0.713718	0.360858	0.254513	0.223077	0.1	0.1	0.1	0.1	0.1	0.1	0.1	0.1	0.1	0.633333	0.1	0.1	0.1	0.633333	0.766667	0.184211	0.1	0.1	0.1	0.1	0.1	0.548499	0.107139	0.491489	0.122222	0.1	0.1	0.1	0.1	0.1	0.1	0.1	0.377612	0.404762	0.26	0.102001	0.547393	0.1
0.713718	0.360858	0.254513	0.223077	0.1	0.1	0.1	0.1	0.1	0.1	0.1	0.1	0.1	0.633333	0.1	0.1	0.1	0.633333	0.766667	0.184211	0.1	0.1	0.1	0.1	0.1	0.548499	0.107139	0.525532	0.122222	0.1	0.1	0.1	0.1	0.1	0.1	0.1	0.377612	0.404762	0.26	0.102001	0.564929	0.232055
0.713718	0.360858	0.254513	0.223077	0.1	0.1	0.1	0.1	0.1	0.1	0.1	0.1	0.1	0.633333	0.1	0.1	0.1	0.633333	0.766667	0.184211	0.1	0.1	0.1	0.1	0.1	0.548499	0.107139	0.559574	0.122222	0.1	0.1	0.1	0.1	0.1	0.1	0.1	0.377612	0.404762	0.26	0.102001	0.487678	0.20394
0.713718	0.360858	0.254513	0.223077	0.1	0.1	0.1	0.1	0.1	0.1	0.1	0.1	0.1	0.633333	0.1	0.1	0.1	0.633333	0.766667	0.184211	0.1	0.1	0.1	0.1	0.1	0.548499	0.107139	0.593617	0.122222	0.1	0.1	0.1	0.1	0.1	0.1	0.1	0.377612	0.404762	0.26	0.102001	0.346445	0.153674
0.728928	0.360858	0.177862	0.219385	0.1	0.1	0.1	0.1	0.1	0.1	0.1	0.1	0.1	0.1	0.101067	0.269697	0.108	0.833333	0.866667	0.226316	0.1	0.1	0.544444	0.133333	0.1	0.580192	0.110499	0.525532	0.233333	0.9	0.1	0.1	0.1	0.1	0.1	0.1	0.377612	0.404762	0.318182	0.104962	0.354028	0.563472
0.728928	0.360858	0.177862	0.219385	0.1	0.1	0.1	0.1	0.1	0.1	0.1	0.1	0.1	0.1	0.101067	0.269697	0.108	0.833333	0.866667	0.226316	0.1	0.1	0.544444	0.133333	0.1	0.580192	0.110499	0.559574	0.233333	0.9	0.1	0.1	0.1	0.1	0.1	0.1	0.377612	0.404762	0.318182	0.104962	0.564455	0.304473
0.781949	0.249762	0.181896	0.289538	0.1	0.1	0.1	0.1	0.1	0.1	0.1	0.1	0.1	0.1	0.1	0.1	0.1	0.766667	0.683333	0.247368	0.1	0.1	0.1	0.1	0.1	0.1	0.807612	0.586809	0.106667	0.1	0.1	0.1	0.1	0.1	0.1	0.1	0.377612	0.404762	0.201818	0.1004	0.33128	0.209904
0.777076	0.248128	0.165759	0.276615	0.213171	0.1	0.1	0.1	0.1	0.1	0.1	0.1	0.1	0.1	0.1	0.1	0.1	0.766667	0.683333	0.247368	0.1	0.1	0.1	0.1	0.1	0.1	0.807612	0.586809	0.106667	0.1	0.1	0.1	0.1	0.1	0.1	0.1	0.377612	0.404762	0.201818	0.1004	0.342654	0.235463
0.781949	0.249762	0.181896	0.289538	0.1	0.1	0.1	0.1	0.1	0.1	0.1	0.1	0.1	0.1	0.1	0.1	0.1	0.766667	0.683333	0.247368	0.1	0.1	0.1	0.1	0.1	0.1	0.807612	0.586809	0.166667	0.9	0.1	0.1	0.1	0.1	0.1	0.1	0.377612	0.404762	0.201818	0.1004	0.355924	0.405857
0.777076	0.248128	0.165759	0.276615	0.213171	0.1	0.1	0.1	0.1	0.1	0.1	0.1	0.1	0.1	0.1	0.1	0.1	0.766667	0.683333	0.247368	0.1	0.1	0.1	0.1	0.1	0.1	0.807612	0.586809	0.166667	0.9	0.1	0.1	0.1	0.1	0.1	0.1	0.377612	0.404762	0.201818	0.1004	0.280095	0.6623
0.569495	0.43356	0.383611	0.567692	0.1	0.1	0.1	0.1	0.1	0.1	0.1	0.1	0.1	0.1	0.1	0.1	0.1	0.766667	0.7205	0.226316	0.1	0.9	0.793333	0.133333	0.9	0.820288	0.1021	0.62766	0.133333	0.9	0.1	0.1	0.1	0.1	0.1	0.1	0.377612	0.9	0.172727	0.110005	0.341232	0.290841
0.569495	0.43356	0.383611	0.567692	0.1	0.1	0.1	0.1	0.1	0.1	0.1	0.1	0.1	0.1	0.1	0.1	0.1	0.766667	0.7205	0.226316	0.1	0.9	0.793333	0.133333	0.9	0.820288	0.1021	0.695745	0.133333	0.9	0.1	0.1	0.1	0.1	0.1	0.1	0.377612	0.9	0.172727	0.110005	0.311848	0.392226
0.569495	0.43356	0.383611	0.567692	0.1	0.1	0.1	0.1	0.1	0.1	0.1	0.1	0.1	0.1	0.1	0.1	0.1	0.766667	0.7205	0.226316	0.1	0.9	0.793333	0.133333	0.9	0.820288	0.1021	0.76383	0.133333	0.9	0.1	0.1	0.1	0.1	0.1	0.1	0.377612	0.9	0.172727	0.110005	0.287204	0.295953
0.559928	0.43002	0.565154	0.580615	0.1	0.1	0.1	0.1	0.1	0.1	0.1	0.1	0.1	0.1	0.1	0.1	0.1	0.766667	0.7205	0.226316	0.1	0.9	0.793333	0.133333	0.9	0.820288	0.1021	0.62766	0.133333	0.9	0.1	0.1	0.1	0.1	0.1	0.1	0.377612	0.9	0.172727	0.110005	0.500948	0.163046
0.559928	0.43002	0.565154	0.580615	0.1	0.1	0.1	0.1	0.1	0.1	0.1	0.1	0.1	0.1	0.1	0.1	0.1	0.766667	0.7205	0.226316	0.1	0.9	0.793333	0.133333	0.9	0.820288	0.1021	0.695745	0.133333	0.9	0.1	0.1	0.1	0.1	0.1	0.1	0.377612	0.9	0.172727	0.110005	0.389573	0.295101
0.559928	0.43002	0.565154	0.580615	0.1	0.1	0.1	0.1	0.1	0.1	0.1	0.1	0.1	0.1	0.1	0.1	0.1	0.766667	0.7205	0.226316	0.1	0.9	0.793333	0.133333	0.9	0.820288	0.1021	0.76383	0.133333	0.9	0.1	0.1	0.1	0.1	0.1	0.1	0.377612	0.9	0.172727	0.110005	0.27346	0.331736
0.709585	0.27917	0.181896	0.290769	0.1	0.1	0.1	0.569636	0.1	0.1	0.1	0.1	0.1	0.1	0.164	0.172727	0.1	0.833333	0.808333	0.276842	0.1	0.1	0.1	0.1	0.1	0.87503	0.1021	0.539149	0.233333	0.1	0.1	0.1	0.1	0.1	0.1	0.1	0.377612	0.709524	0.172727	0.107604	0.325592	0.302769
0.709585	0.27917	0.181896	0.290769	0.1	0.1	0.1	0.569636	0.1	0.1	0.1	0.1	0.1	0.1	0.164	0.172727	0.1	0.833333	0.808333	0.276842	0.1	0.1	0.1	0.1	0.1	0.87503	0.1021	0.545957	0.233333	0.1	0.1	0.1	0.1	0.1	0.1	0.1	0.377612	0.709524	0.172727	0.107604	0.329858	0.533653
0.788339	0.318652	0.137519	0.118462	0.1	0.1	0.1	0.1	0.1	0.1	0.1	0.1	0.1	0.1	0.132	0.172727	0.1	0.833333	0.783333	0.247368	0.1	0.9	0.487556	0.133333	0.1	0.760744	0.105459	0.525532	0.166667	0.1	0.1	0.1	0.1	0.1	0.1	0.1	0.392537	0.404762	0.230909	0.107604	0.497156	0.312226
0.552888	0.382641	0.597428	0.706769	0.1	0.1	0.1	0.1	0.1	0.1	0.1	0.1	0.1	0.1	0.1	0.1	0.1	0.833333	0.741667	0.226316	0.1	0.1	0.793333	0.133333	0.9	0.820288	0.1021	0.76383	0.122222	0.9	0.1	0.1	0.1	0.1	0.1	0.1	0.377612	0.404762	0.172727	0.107604	0.49763	0.271246
0.5287	0.682165	0.274685	0.161538	0.1	0.1	0.1	0.1	0.1	0.1	0.1	0.1	0.1	0.1	0.1	0.1	0.1	0.7	0.266667	0.563158	0.9	0.9	0.1	0.1	0.1	0.1	0.597638	0.389362	0.233333	0.1	0.1	0.1	0.1	0.1	0.1	0.1	0.377612	0.404762	0.172727	0.107604	0.250711	0.802023
0.51065	0.682165	0.274685	0.161538	0.1	0.1	0.1	0.261943	0.1	0.1	0.1	0.1	0.1	0.1	0.1	0.1	0.1	0.7	0.266667	0.563158	0.9	0.9	0.1	0.1	0.1	0.1	0.597638	0.389362	0.233333	0.1	0.1	0.1	0.1	0.1	0.1	0.1	0.377612	0.404762	0.172727	0.107604	0.253555	0.765389
0.361733	0.627706	0.577257	0.807692	0.1	0.1	0.1	0.1	0.1	0.1	0.1	0.1	0.1	0.1	0.1	0.1	0.1	0.566667	0.7	0.352632	0.1	0.1	0.1	0.1	0.1	0.1	0.81601	0.797872	0.366667	0.9	0.1	0.1	0.1	0.1	0.1	0.1	0.377612	0.709524	0.463636	0.122011	0.459242	0.213312
0.677256	0.387815	0.173828	0.335692	0.1	0.1	0.1	0.1	0.1	0.1	0.1	0.1	0.1	0.1	0.1	0.1	0.1	0.833333	0.71	0.226316	0.1	0.1	0.1	0.1	0.1	0.1	0.82105	0.610638	0.233333	0.9	0.1	0.1	0.1	0.621739	0.366667	0.1	0.377612	0.328571	0.230909	0.1004	0.296493	0.760277
0.524007	0.491559	0.415885	0.530769	0.1	0.1	0.1	0.1	0.1	0.1	0.1	0.1	0.125806	0.9	0.1	0.1	0.1	0.7	0.855	0.175789	0.1	0.366667	0.544444	0.133333	0.1	0.580192	0.105459	0.648085	0.102222	0.1	0.1	0.1	0.1	0.1	0.1	0.1	0.377612	0.404762	0.216364	0.107604	0.372986	0.423749
0.554874	0.415589	0.18593	0.1	0.626829	0.281659	0.1	0.524291	0.1	0.847475	0.1	0.1	0.9	0.1	0.1	0.1	0.1	0.766667	0.6	0.125263	0.1	0.9	0.1	0.1	0.1	0.148019	0.106467	0.1	0.1	0.1	0.1	0.1	0.1	0.1	0.1	0.1	0.191045	0.404762	0.248364	0.131616	0.354502	0.295101
0.554874	0.415589	0.18593	0.1	0.626829	0.281659	0.1	0.524291	0.1	0.847475	0.1	0.1	0.9	0.1	0.1	0.1	0.1	0.766667	0.6	0.125263	0.1	0.9	0.1	0.1	0.1	0.148019	0.106467	0.62766	0.9	0.9	0.1	0.1	0.1	0.1	0.1	0.1	0.191045	0.404762	0.248364	0.131616	0.408531	0.44164
0.554874	0.415589	0.18593	0.1	0.626829	0.281659	0.1	0.524291	0.1	0.847475	0.1	0.1	0.9	0.1	0.1	0.1	0.1	0.766667	0.6	0.125263	0.1	0.9	0.1	0.1	0.1	0.148019	0.106467	0.62766	0.9	0.9	0.1	0.1	0.1	0.1	0.1	0.1	0.191045	0.404762	0.248364	0.131616	0.396209	0.593291
0.890036	0.164261	0.145587	0.100246	0.154634	0.1	0.18	0.1	0.1	0.1	0.1	0.1	0.107742	0.1	0.206667	0.221212	0.1	0.7	0.7205	0.226316	0.1	0.1	0.1	0.1	0.1	0.611885	0.105459	0.593617	0.106667	0.1	0.676744	0.3	0.1	0.1	0.1	0.1	0.377612	0.404762	0.230909	0.107604	0.547393	0.161342
0.890036	0.164261	0.145587	0.100246	0.154634	0.1	0.18	0.1	0.1	0.1	0.1	0.1	0.107742	0.1	0.206667	0.221212	0.1	0.7	0.7205	0.226316	0.1	0.1	0.1	0.1	0.1	0.611885	0.105459	0.593617	0.106667	0.1	0.691628	0.3	0.1	0.1	0.1	0.1	0.377612	0.404762	0.230909	0.107604	0.544076	0.163898
0.890036	0.164261	0.145587	0.100246	0.154634	0.1	0.18	0.1	0.1	0.1	0.1	0.1	0.107742	0.1	0.206667	0.221212	0.1	0.7	0.7205	0.226316	0.1	0.1	0.1	0.1	0.1	0.611885	0.105459	0.593617	0.106667	0.1	0.706512	0.3	0.1	0.1	0.1	0.1	0.377612	0.404762	0.230909	0.107604	0.537441	0.157934
0.890036	0.164261	0.145587	0.100246	0.154634	0.1	0.18	0.1	0.1	0.1	0.1	0.1	0.107742	0.1	0.206667	0.221212	0.1	0.7	0.7205	0.226316	0.1	0.1	0.1	0.1	0.1	0.611885	0.105459	0.593617	0.106667	0.1	0.676744	0.3	0.9	0.1	0.1	0.1	0.377612	0.404762	0.230909	0.107604	0.632701	0.16475
0.890036	0.164261	0.145587	0.100246	0.154634	0.1	0.18	0.1	0.1	0.1	0.1	0.1	0.107742	0.1	0.206667	0.221212	0.1	0.7	0.7205	0.226316	0.1	0.1	0.1	0.1	0.1	0.611885	0.105459	0.593617	0.106667	0.1	0.691628	0.3	0.9	0.1	0.1	0.1	0.377612	0.404762	0.230909	0.107604	0.654976	0.157934
0.890036	0.164261	0.145587	0.100246	0.154634	0.1	0.18	0.1	0.1	0.1	0.1	0.1	0.107742	0.1	0.206667	0.221212	0.1	0.7	0.7205	0.226316	0.1	0.1	0.1	0.1	0.1	0.611885	0.105459	0.593617	0.106667	0.1	0.706512	0.3	0.9	0.1	0.1	0.1	0.377612	0.404762	0.230909	0.107604	0.617062	0.146858
0.849603	0.221988	0.153656	0.100615	0.172195	0.1	0.18	0.1	0.1	0.1	0.1	0.1	0.1	0.1	0.270667	0.245455	0.1	0.7	0.7205	0.226316	0.1	0.1	0.1	0.1	0.1	0.611885	0.105459	0.593617	0.106667	0.1	0.639535	0.3	0.1	0.1	0.1	0.1	0.377612	0.404762	0.230909	0.107604	0.652133	0.162194
0.849603	0.221988	0.153656	0.100615	0.172195	0.1	0.18	0.1	0.1	0.1	0.1	0.1	0.1	0.1	0.270667	0.245455	0.1	0.7	0.7205	0.226316	0.1	0.1	0.1	0.1	0.1	0.611885	0.105459	0.593617	0.106667	0.1	0.654419	0.3	0.1	0.1	0.1	0.1	0.377612	0.404762	0.230909	0.107604	0.663507	0.16475
0.849603	0.221988	0.153656	0.100615	0.172195	0.1	0.18	0.1	0.1	0.1	0.1	0.1	0.1	0.1	0.270667	0.245455	0.1	0.7	0.7205	0.226316	0.1	0.1	0.1	0.1	0.1	0.611885	0.105459	0.593617	0.106667	0.1	0.669302	0.3	0.1	0.1	0.1	0.1	0.377612	0.404762	0.230909	0.107604	0.692417	0.163898
0.808935	0.27917	0.177862	0.103508	0.176098	0.1	0.1	0.1	0.1	0.1	0.1	0.1	0.1	0.1	0.473333	0.9	0.1	0.7	0.7205	0.226316	0.1	0.1	0.1	0.1	0.1	0.611885	0.105459	0.593617	0.106667	0.1	0.609767	0.3	0.1	0.1	0.1	0.1	0.377612	0.404762	0.230909	0.107604	0.75782	0.171565
0.808935	0.27917	0.177862	0.103508	0.176098	0.1	0.1	0.1	0.1	0.1	0.1	0.1	0.1	0.1	0.473333	0.9	0.1	0.7	0.7205	0.226316	0.1	0.1	0.1	0.1	0.1	0.611885	0.105459	0.593617	0.106667	0.1	0.624651	0.3	0.1	0.1	0.1	0.1	0.377612	0.404762	0.230909	0.107604	0.754502	0.174121
0.808935	0.27917	0.177862	0.103508	0.176098	0.1	0.1	0.1	0.1	0.1	0.1	0.1	0.1	0.1	0.473333	0.9	0.1	0.7	0.7205	0.226316	0.1	0.1	0.1	0.1	0.1	0.611885	0.105459	0.593617	0.106667	0.1	0.639535	0.3	0.1	0.1	0.1	0.1	0.377612	0.404762	0.230909	0.107604	0.748815	0.173269
0.832852	0.224711	0.153656	0.167692	0.119512	0.104367	0.1	0.1	0.1	0.1	0.1	0.1	0.1	0.1	0.1	0.1	0.1	0.566667	0.711667	0.226316	0.1	0.1	0.544444	0.3	0.1	0.67623	0.107139	0.542553	0.122222	0.1	0.1	0.1	0.1	0.1	0.1	0.1	0.377612	0.404762	0.26	0.107604	0.308057	0.448456
0.794043	0.178421	0.193999	0.407692	0.1	0.1	0.1	0.1	0.1	0.1	0.1	0.1	0.1	0.1	0.1	0.1	0.1	0.633333	0.7205	0.205263	0.1	0.1	0.544444	0.133333	0.1	0.730972	0.10378	0.661702	0.111111	0.9	0.1	0.1	0.1	0.1	0.1	0.1	0.51194	0.435238	0.201818	0.107604	0.263507	0.422897
0.676715	0.355412	0.193999	0.407692	0.1	0.1	0.1	0.1	0.1	0.1	0.1	0.1	0.1	0.1	0.1	0.1	0.1	0.633333	0.7205	0.205263	0.1	0.1	0.544444	0.133333	0.1	0.730972	0.10378	0.661702	0.111111	0.9	0.1	0.1	0.1	0.1	0.1	0.1	0.51194	0.435238	0.201818	0.107604	0.230332	0.456976
0.571105	0.430837	0.383611	0.567692	0.1	0.1	0.1	0.1	0.1	0.1	0.1	0.1	0.1	0.1	0.153333	0.240606	0.1	0.766667	0.7205	0.226316	0.1	0.9	0.793333	0.133333	0.9	0.820288	0.1021	0.695745	0.233333	0.9	0.1	0.1	0.1	0.1	0.1	0.1	0.377612	0.9	0.172727	0.107604	0.292891	0.321512
0.513715	0.505446	0.427988	0.588	0.1	0.1	0.1	0.1	0.1	0.1	0.1	0.1	0.1	0.1	0.153333	0.226061	0.1	0.766667	0.7205	0.226316	0.1	0.9	0.793333	0.133333	0.9	0.820288	0.1021	0.695745	0.233333	0.9	0.1	0.1	0.1	0.1	0.1	0.1	0.377612	0.404762	0.318182	0.107604	0.287678	0.462939
0.465704	0.576515	0.444125	0.589231	0.1	0.1	0.1	0.1	0.1	0.1	0.1	0.1	0.1	0.1	0.1	0.1	0.1	0.766667	0.7205	0.226316	0.1	0.9	0.793333	0.133333	0.9	0.820288	0.1021	0.695745	0.233333	0.9	0.1	0.1	0.1	0.1	0.1	0.1	0.377612	0.404762	0.318182	0.107604	0.291469	0.479979
0.366245	0.603199	0.678114	0.832308	0.1	0.1	0.1	0.1	0.1	0.1	0.1	0.1	0.1	0.1	0.1	0.1	0.1	0.7	0.7205	0.352632	0.1	0.1	0.1	0.1	0.1	0.1	0.826341	0.797872	0.366667	0.1	0.1	0.1	0.1	0.1	0.1	0.1	0.377612	0.404762	0.318182	0.107604	0.474408	0.134079
0.337184	0.600477	0.661977	0.826154	0.1	0.261572	0.1	0.1	0.1	0.1	0.1	0.1	0.1	0.1	0.1	0.1	0.1	0.7	0.7205	0.352632	0.1	0.1	0.1	0.1	0.1	0.1	0.826341	0.797872	0.366667	0.1	0.1	0.1	0.1	0.1	0.1	0.1	0.377612	0.404762	0.318182	0.107604	0.44218	0.284878
0.269495	0.627706	0.670045	0.807692	0.1	0.526201	0.1	0.1	0.1	0.1	0.1	0.1	0.1	0.1	0.1	0.1	0.1	0.7	0.7205	0.352632	0.1	0.1	0.1	0.1	0.1	0.1	0.826341	0.797872	0.366667	0.1	0.1	0.1	0.1	0.1	0.1	0.1	0.377612	0.404762	0.318182	0.107604	0.392891	0.422897
0.271841	0.597754	0.686183	0.832308	0.1	0.572489	0.1	0.1	0.1	0.1	0.1	0.1	0.1	0.1	0.1	0.1	0.1	0.7	0.7205	0.352632	0.1	0.1	0.1	0.1	0.1	0.1	0.826341	0.797872	0.366667	0.1	0.1	0.1	0.1	0.1	0.1	0.1	0.377612	0.404762	0.318182	0.107604	0.474882	0.266134
0.26083	0.589585	0.770903	0.832308	0.1	0.633624	0.1	0.1	0.1	0.1	0.1	0.1	0.1	0.1	0.1	0.1	0.1	0.7	0.7205	0.352632	0.1	0.1	0.1	0.1	0.1	0.1	0.826341	0.797872	0.366667	0.1	0.1	0.1	0.1	0.1	0.1	0.1	0.377612	0.404762	0.318182	0.107604	0.494313	0.128967
0.791516	0.253302	0.254513	0.237846	0.1	0.1	0.1	0.1	0.1	0.1	0.1	0.1	0.1	0.1	0.1	0.1	0.1	0.766667	0.821667	0.184211	0.1	0.9	0.466222	0.100056	0.1	0.1	0.877323	0.559574	0.144444	0.1	0.1	0.1	0.1	0.1	0.1	0.1	0.377612	0.404762	0.463636	0.107604	0.382464	0.635889
0.791516	0.253302	0.254513	0.237846	0.1	0.1	0.1	0.1	0.1	0.1	0.1	0.1	0.1	0.1	0.1	0.1	0.1	0.766667	0.821667	0.184211	0.1	0.9	0.466222	0.100056	0.1	0.1	0.877323	0.576596	0.144444	0.1	0.1	0.1	0.1	0.1	0.1	0.1	0.377612	0.404762	0.463636	0.107604	0.535071	0.448456
0.771372	0.238053	0.112506	0.1	0.181951	0.1	0.1	0.417409	0.1	0.859596	0.1	0.1	0.1	0.1	0.142667	0.19697	0.1	0.433333	0.7205	0.394737	0.1	0.1	0.1	0.1	0.1	0.820288	0.106299	0.518723	0.106667	0.1	0.1	0.1	0.1	0.1	0.1	0.1	0.377612	0.404762	0.245455	0.1004	0.448341	0.278062
0.734332	0.326549	0.181896	0.1	0.663902	0.1	0.1	0.1	0.1	0.1	0.1	0.1	0.1	0.1	0.142667	0.19697	0.1	0.833333	0.766667	0.226316	0.1	0.1	0.1	0.1	0.1	0.1	0.849606	0.518723	0.766667	0.9	0.1	0.1	0.1	0.1	0.1	0.1	0.377612	0.404762	0.609091	0.107604	0.657346	0.189286
0.740794	0.314568	0.173828	0.284615	0.1	0.1	0.1	0.1	0.1	0.1	0.1	0.1	0.1	0.1	0.1	0.1	0.1	0.766667	0.71	0.226316	0.1	0.1	0.1	0.1	0.1	0.820288	0.1021	0.1	0.1	0.1	0.1	0.1	0.1	0.1	0.1	0.1	0.302985	0.328571	0.172727	0.11961	0.340284	0.538765
0.709747	0.27917	0.181896	0.290769	0.1	0.1	0.1	0.569636	0.1	0.1	0.1	0.1	0.1	0.1	0.1	0.1	0.1	0.806667	0.808333	0.276842	0.1	0.1	0.1	0.1	0.1	0.87503	0.1021	0.573191	0.122222	0.1	0.1	0.1	0.1	0.1	0.1	0.1	0.377612	0.709524	0.172727	0.107604	0.4291	0.338552
0.732671	0.359769	0.141553	0.215077	0.1	0.1	0.1	0.1	0.1	0.1	0.1	0.1	0.1	0.1	0.1	0.1	0.1	0.7	0.6	0.226316	0.1	0.1	0.1	0.1	0.1	0.70024	0.106299	0.508511	0.233333	0.1	0.1	0.1	0.1	0.1	0.1	0.1	0.153731	0.17619	0.1	0.107604	0.395735	0.308733
0.732671	0.359769	0.141553	0.215077	0.1	0.1	0.1	0.1	0.1	0.1	0.1	0.1	0.1	0.1	0.1	0.1	0.1	0.7	0.6	0.226316	0.1	0.1	0.1	0.1	0.1	0.70024	0.106299	0.525532	0.233333	0.1	0.1	0.1	0.1	0.1	0.1	0.1	0.153731	0.17619	0.1	0.107604	0.426066	0.463791
0.732671	0.359769	0.141553	0.215077	0.1	0.1	0.1	0.1	0.1	0.1	0.1	0.1	0.1	0.1	0.1	0.1	0.1	0.7	0.6	0.226316	0.1	0.1	0.1	0.1	0.1	0.70024	0.106299	0.542553	0.233333	0.1	0.1	0.1	0.1	0.1	0.1	0.1	0.153731	0.17619	0.1	0.107604	0.505213	0.347071
0.732671	0.359769	0.141553	0.215077	0.1	0.1	0.1	0.1	0.1	0.1	0.1	0.1	0.1	0.1	0.1	0.1	0.1	0.7	0.6	0.226316	0.1	0.1	0.1	0.1	0.1	0.70024	0.106299	0.559574	0.233333	0.1	0.1	0.1	0.1	0.1	0.1	0.1	0.153731	0.17619	0.1	0.107604	0.547867	0.237167
0.630322	0.520694	0.419919	0.1	0.191707	0.1	0.1	0.1	0.1	0.1	0.1	0.1	0.1	0.517778	0.1	0.1	0.103733	0.833333	0.6	0.268421	0.1	0.1	0.1	0.1	0.1	0.868307	0.1021	0.661702	0.102222	0.9	0.1	0.1	0.1	0.1	0.1	0.1	0.237313	0.328571	0.172727	0.107604	0.523223	0.405857
0.630322	0.520694	0.419919	0.1	0.191707	0.1	0.1	0.1	0.1	0.1	0.1	0.1	0.1	0.517778	0.1	0.1	0.103733	0.833333	0.6	0.268421	0.1	0.1	0.1	0.1	0.1	0.868307	0.1021	0.661702	0.133333	0.9	0.1	0.1	0.1	0.1	0.1	0.1	0.237313	0.328571	0.172727	0.107604	0.462559	0.405857
0.615809	0.495099	0.18593	0.298154	0.1	0.1	0.1	0.1	0.1	0.1	0.124	0.1	0.1	0.1	0.165067	0.296364	0.1	0.833333	0.766667	0.184211	0.1	0.1	0.1	0.1	0.1	0.740576	0.1021	0.661702	0.104444	0.1	0.1	0.1	0.1	0.1	0.1	0.1	0.153731	0.328571	0.172727	0.65988	0.334597	0.622258
0.615809	0.495099	0.18593	0.298154	0.1	0.1	0.1	0.1	0.1	0.1	0.124	0.1	0.1	0.1	0.165067	0.296364	0.1	0.833333	0.766667	0.184211	0.1	0.1	0.1	0.1	0.1	0.740576	0.1021	0.661702	0.104444	0.1	0.1	0.1	0.1	0.1	0.1	0.1	0.153731	0.328571	0.172727	0.155628	0.36019	0.4459
0.763357	0.271001	0.234342	0.296923	0.1	0.1	0.1	0.1	0.1	0.1	0.1	0.1	0.1	0.1	0.1	0.1	0.1	0.766667	0.7205	0.226316	0.1	0.1	0.629778	0.116667	0.1	0.580192	0.110499	0.525532	0.233333	0.9	0.1	0.1	0.1	0.1	0.1	0.1	0.452239	0.9	0.318182	0.107604	0.403318	0.243983
0.763357	0.271001	0.234342	0.296923	0.1	0.1	0.1	0.1	0.1	0.1	0.1	0.1	0.1	0.1	0.1	0.1	0.1	0.766667	0.7205	0.226316	0.1	0.1	0.629778	0.116667	0.1	0.580192	0.110499	0.559574	0.233333	0.9	0.1	0.1	0.1	0.1	0.1	0.1	0.452239	0.9	0.318182	0.107604	0.367773	0.405857
0.763357	0.271001	0.234342	0.296923	0.1	0.1	0.1	0.1	0.1	0.1	0.1	0.1	0.1	0.1	0.1	0.1	0.1	0.766667	0.7205	0.226316	0.1	0.1	0.629778	0.116667	0.1	0.580192	0.110499	0.593617	0.106667	0.9	0.1	0.1	0.1	0.1	0.1	0.1	0.452239	0.9	0.318182	0.107604	0.311374	0.371778
0.763357	0.271001	0.234342	0.296923	0.1	0.1	0.1	0.1	0.1	0.1	0.1	0.1	0.1	0.1	0.1	0.1	0.1	0.766667	0.7205	0.226316	0.1	0.1	0.629778	0.116667	0.1	0.580192	0.110499	0.593617	0.122222	0.9	0.1	0.1	0.1	0.1	0.1	0.1	0.452239	0.9	0.318182	0.107604	0.31564	0.380298
0.763357	0.271001	0.234342	0.296923	0.1	0.1	0.1	0.1	0.1	0.1	0.1	0.1	0.1	0.1	0.1	0.1	0.1	0.766667	0.7205	0.226316	0.1	0.1	0.629778	0.116667	0.1	0.580192	0.110499	0.593617	0.166667	0.9	0.1	0.1	0.1	0.1	0.1	0.1	0.452239	0.9	0.318182	0.107604	0.310427	0.593291
0.763357	0.271001	0.234342	0.296923	0.1	0.1	0.1	0.1	0.1	0.1	0.1	0.1	0.1	0.1	0.1	0.1	0.1	0.766667	0.7205	0.226316	0.1	0.1	0.629778	0.116667	0.1	0.580192	0.110499	0.593617	0.233333	0.9	0.1	0.1	0.1	0.1	0.1	0.1	0.452239	0.9	0.318182	0.107604	0.404739	0.652929
0.763357	0.271001	0.234342	0.296923	0.1	0.1	0.1	0.1	0.1	0.1	0.1	0.1	0.1	0.1	0.1	0.1	0.1	0.766667	0.7205	0.226316	0.1	0.1	0.629778	0.116667	0.1	0.580192	0.110499	0.593617	0.3	0.9	0.1	0.1	0.1	0.1	0.1	0.1	0.452239	0.9	0.318182	0.107604	0.3	0.388818
0.763357	0.271001	0.234342	0.296923	0.1	0.1	0.1	0.1	0.1	0.1	0.1	0.1	0.1	0.1	0.1	0.1	0.1	0.766667	0.7205	0.226316	0.1	0.1	0.629778	0.116667	0.1	0.580192	0.110499	0.62766	0.233333	0.9	0.1	0.1	0.1	0.1	0.1	0.1	0.452239	0.9	0.318182	0.107604	0.423223	0.380298
0.641697	0.542206	0.113313	0.1	0.154634	0.1	0.1	0.1	0.1	0.1	0.1	0.1	0.1	0.1	0.1	0.1	0.1	0.633333	0.85	0.171579	0.1	0.1	0.864444	0.133333	0.1	0.526411	0.106299	0.559574	0.144444	0.9	0.1	0.1	0.1	0.1	0.1	0.1	0.377612	0.557143	0.245455	0.107604	0.335545	0.433972
0.641697	0.542206	0.113313	0.1	0.154634	0.1	0.1	0.1	0.1	0.1	0.1	0.1	0.1	0.1	0.1	0.1	0.1	0.633333	0.85	0.171579	0.1	0.1	0.864444	0.133333	0.1	0.526411	0.106299	0.62766	0.144444	0.9	0.1	0.1	0.1	0.1	0.1	0.1	0.377612	0.557143	0.245455	0.107604	0.342654	0.465495
0.641697	0.542206	0.113313	0.1	0.154634	0.1	0.1	0.1	0.1	0.1	0.1	0.1	0.1	0.1	0.1	0.1	0.1	0.633333	0.85	0.171579	0.1	0.1	0.864444	0.133333	0.1	0.526411	0.106299	0.695745	0.144444	0.9	0.1	0.1	0.1	0.1	0.1	0.1	0.377612	0.557143	0.245455	0.107604	0.265403	0.529393
0.641697	0.542206	0.113313	0.1	0.154634	0.1	0.1	0.1	0.1	0.1	0.1	0.1	0.1	0.1	0.1	0.1	0.1	0.633333	0.85	0.171579	0.1	0.1	0.864444	0.133333	0.1	0.526411	0.106299	0.76383	0.144444	0.9	0.1	0.1	0.1	0.1	0.1	0.1	0.377612	0.557143	0.245455	0.107604	0.254028	0.573695
0.641155	0.491559	0.254513	0.1	0.295122	0.1	0.1	0.1	0.5	0.1	0.1	0.1	0.1	0.544444	0.206667	0.342424	0.1	0.7	0.833333	0.175789	0.1	0.1	0.1	0.1	0.1	0.378511	0.110499	0.1	0.1	0.1	0.1	0.1	0.1	0.1	0.1	0.1	0.377612	0.404762	0.172727	0.107604	0.585782	0.456976
0.831047	0.23288	0.173828	0.161538	0.1	0.1	0.1	0.1	0.1	0.1	0.1	0.1	0.1	0.1	0.1	0.1	0.1	0.766667	0.716667	0.226316	0.1	0.1	0.1	0.1	0.1	0.820288	0.1021	0.525532	0.12	0.9	0.1	0.1	0.1	0.1	0.1	0.1	0.377612	0.9	0.172727	0.115608	0.400948	0.467199
0.550361	0.382641	0.597428	0.715385	0.1	0.1	0.1	0.1	0.1	0.1	0.1	0.1	0.1	0.1	0.1	0.1	0.1	0.833333	0.836667	0.142105	0.1	0.1	0.1	0.1	0.1	0.1	0.884882	0.76383	0.144444	0.1	0.1	0.1	0.1	0.1	0.1	0.1	0.377612	0.404762	0.172727	0.107604	0.449763	0.124707
0.550361	0.382641	0.597428	0.715385	0.1	0.1	0.1	0.1	0.1	0.1	0.1	0.1	0.1	0.1	0.1	0.1	0.1	0.833333	0.836667	0.142105	0.1	0.1	0.1	0.1	0.1	0.1	0.884882	0.76383	0.144444	0.9	0.1	0.1	0.1	0.1	0.1	0.1	0.377612	0.404762	0.172727	0.107604	0.400427	0.174121
0.540072	0.491559	0.415885	0.530769	0.1	0.1	0.1	0.1	0.1	0.1	0.1	0.1	0.1	0.1	0.206667	0.342424	0.1	0.7	0.85	0.184211	0.1	0.1	0.544444	0.133333	0.1	0.1	0.891601	0.1	0.1	0.1	0.1	0.1	0.1	0.1	0.1	0.1	0.377612	0.404762	0.390909	0.107604	0.378673	0.276358
0.449819	0.627706	0.415885	0.530769	0.1	0.1	0.1	0.1	0.1	0.1	0.1	0.1	0.1	0.1	0.206667	0.342424	0.1	0.7	0.85	0.184211	0.1	0.1	0.544444	0.133333	0.1	0.1	0.891601	0.1	0.1	0.1	0.1	0.1	0.1	0.1	0.1	0.1	0.377612	0.404762	0.390909	0.107604	0.38673	0.297657
0.594224	0.409871	0.415885	0.530769	0.1	0.1	0.1	0.1	0.1	0.1	0.1	0.1	0.1	0.1	0.206667	0.342424	0.1	0.7	0.85	0.184211	0.1	0.1	0.544444	0.133333	0.1	0.1	0.891601	0.62766	0.233333	0.1	0.1	0.1	0.1	0.1	0.1	0.1	0.377612	0.404762	0.390909	0.107604	0.347867	0.378594
0.540072	0.491559	0.415885	0.530769	0.1	0.1	0.1	0.1	0.1	0.1	0.1	0.1	0.1	0.1	0.206667	0.342424	0.1	0.7	0.85	0.184211	0.1	0.1	0.544444	0.133333	0.1	0.1	0.891601	0.62766	0.233333	0.1	0.1	0.1	0.1	0.1	0.1	0.1	0.377612	0.404762	0.390909	0.107604	0.358294	0.399894
0.449819	0.627706	0.415885	0.530769	0.1	0.1	0.1	0.1	0.1	0.1	0.1	0.1	0.1	0.1	0.206667	0.342424	0.1	0.7	0.85	0.184211	0.1	0.1	0.544444	0.133333	0.1	0.1	0.891601	0.62766	0.233333	0.1	0.1	0.1	0.1	0.1	0.1	0.1	0.377612	0.404762	0.390909	0.107604	0.351185	0.374334
0.829874	0.212457	0.12945	0.139385	0.341951	0.1	0.1	0.1	0.1	0.1	0.1	0.1	0.1	0.1	0.505333	0.269697	0.1	0.7	0.725	0.163158	0.1	0.1	0.828889	0.116667	0.9	0.1	0.828609	0.498298	0.233333	0.9	0.1	0.1	0.1	0.1	0.1	0.1	0.377612	0.404762	0.390909	0.107604	0.246445	0.183493
0.829874	0.212457	0.12945	0.139385	0.341951	0.1	0.1	0.1	0.1	0.1	0.1	0.1	0.1	0.1	0.505333	0.269697	0.1	0.7	0.725	0.163158	0.1	0.1	0.828889	0.116667	0.9	0.1	0.828609	0.498298	0.5	0.9	0.1	0.1	0.1	0.1	0.1	0.1	0.377612	0.404762	0.390909	0.107604	0.254028	0.189457
0.829874	0.212457	0.12945	0.139385	0.341951	0.1	0.1	0.1	0.1	0.1	0.1	0.1	0.1	0.1	0.505333	0.269697	0.1	0.7	0.725	0.163158	0.1	0.1	0.828889	0.116667	0.9	0.1	0.828609	0.511915	0.5	0.9	0.1	0.1	0.1	0.1	0.1	0.1	0.377612	0.404762	0.390909	0.107604	0.242654	0.192865
0.829874	0.212457	0.12945	0.139385	0.341951	0.1	0.1	0.1	0.1	0.1	0.1	0.1	0.1	0.1	0.505333	0.269697	0.1	0.7	0.725	0.163158	0.1	0.1	0.828889	0.116667	0.9	0.1	0.828609	0.525532	0.233333	0.9	0.1	0.1	0.1	0.1	0.1	0.1	0.377612	0.404762	0.390909	0.107604	0.236967	0.194569
0.829874	0.212457	0.12945	0.139385	0.341951	0.1	0.1	0.1	0.1	0.1	0.1	0.1	0.1	0.1	0.505333	0.269697	0.1	0.7	0.725	0.163158	0.1	0.1	0.828889	0.116667	0.9	0.1	0.828609	0.539149	0.233333	0.9	0.1	0.1	0.1	0.1	0.1	0.1	0.377612	0.404762	0.390909	0.107604	0.338863	0.221832
0.648736	0.300953	0.415885	0.592308	0.1	0.1	0.1	0.1	0.1	0.1	0.1	0.1	0.1	0.1	0.1	0.1	0.1	0.766667	0.766667	0.226316	0.1	0.1	0.1	0.1	0.1	0.1	0.849606	0.695745	0.233333	0.9	0.1	0.1	0.1	0.343478	0.133333	0.1	0.750746	0.328571	0.609091	0.107604	0.66872	0.202236
0.648736	0.300953	0.415885	0.592308	0.1	0.1	0.1	0.1	0.1	0.1	0.1	0.1	0.1	0.1	0.1	0.1	0.1	0.766667	0.766667	0.226316	0.1	0.1	0.1	0.1	0.1	0.1	0.849606	0.695745	0.233333	0.9	0.1	0.1	0.1	0.343478	0.233333	0.1	0.750746	0.328571	0.609091	0.107604	0.589573	0.295101
0.648736	0.300953	0.415885	0.592308	0.1	0.1	0.1	0.1	0.1	0.1	0.1	0.1	0.1	0.1	0.1	0.1	0.1	0.766667	0.766667	0.226316	0.1	0.1	0.1	0.1	0.1	0.1	0.849606	0.695745	0.233333	0.9	0.1	0.1	0.1	0.343478	0.5	0.1	0.750746	0.328571	0.609091	0.107604	0.541232	0.328328
0.648736	0.300953	0.415885	0.592308	0.1	0.1	0.1	0.1	0.1	0.1	0.1	0.1	0.1	0.1	0.1	0.1	0.1	0.766667	0.766667	0.226316	0.1	0.1	0.1	0.1	0.1	0.1	0.849606	0.695745	0.233333	0.9	0.1	0.1	0.1	0.343478	0.9	0.1	0.750746	0.328571	0.609091	0.107604	0.464929	0.129819
0.79639	0.262832	0.161725	0.167692	0.1	0.1	0.1	0.1	0.393333	0.1	0.5	0.1	0.1	0.1	0.1	0.1	0.9	0.833333	0.7205	0.310526	0.1	0.633333	0.1	0.1	0.1	0.580192	0.118898	0.525532	0.233333	0.1	0.1	0.1	0.1	0.1	0.1	0.1	0.377612	0.709524	0.172727	0.107604	0.427014	0.37263
0.79639	0.262832	0.161725	0.167692	0.1	0.1	0.1	0.1	0.393333	0.1	0.5	0.1	0.1	0.1	0.1	0.1	0.9	0.833333	0.7205	0.310526	0.1	0.633333	0.1	0.1	0.1	0.820288	0.106299	0.525532	0.233333	0.1	0.1	0.1	0.1	0.1	0.1	0.1	0.377612	0.709524	0.172727	0.107604	0.436019	0.336848
0.79639	0.262832	0.161725	0.167692	0.1	0.1	0.1	0.1	0.393333	0.1	0.5	0.1	0.1	0.1	0.1	0.1	0.9	0.833333	0.7205	0.310526	0.1	0.366667	0.1	0.1	0.1	0.580192	0.118898	0.525532	0.233333	0.1	0.1	0.1	0.1	0.1	0.1	0.1	0.377612	0.709524	0.172727	0.107604	0.366351	0.39393
0.79639	0.262832	0.161725	0.167692	0.1	0.1	0.1	0.1	0.393333	0.1	0.5	0.1	0.1	0.1	0.1	0.1	0.9	0.833333	0.7205	0.310526	0.1	0.366667	0.1	0.1	0.1	0.820288	0.106299	0.525532	0.233333	0.1	0.1	0.1	0.1	0.1	0.1	0.1	0.377612	0.709524	0.172727	0.107604	0.376777	0.394782
0.736823	0.355412	0.133485	0.1	0.295122	0.1	0.1	0.1	0.5	0.1	0.1	0.1	0.1	0.544444	0.206667	0.342424	0.1	0.7	0.833333	0.175789	0.9	0.1	0.544444	0.133333	0.366667	0.1	0.883202	0.1	0.1	0.1	0.1	0.1	0.1	0.1	0.1	0.1	0.377612	0.404762	0.390909	0.107604	0.705687	0.176677
0.736823	0.355412	0.133485	0.1	0.295122	0.1	0.1	0.1	0.5	0.1	0.1	0.1	0.1	0.544444	0.206667	0.342424	0.1	0.7	0.833333	0.175789	0.9	0.1	0.544444	0.133333	0.366667	0.1	0.883202	0.355319	0.233333	0.9	0.1	0.1	0.1	0.1	0.1	0.1	0.377612	0.404762	0.390909	0.107604	0.63128	0.258466
0.736823	0.355412	0.133485	0.1	0.295122	0.1	0.1	0.1	0.5	0.1	0.1	0.1	0.1	0.544444	0.206667	0.342424	0.1	0.7	0.833333	0.175789	0.9	0.1	0.544444	0.133333	0.366667	0.1	0.883202	0.491489	0.233333	0.9	0.1	0.1	0.1	0.1	0.1	0.1	0.377612	0.404762	0.390909	0.107604	0.545972	0.221832
0.752527	0.294146	0.302925	0.271077	0.1	0.1	0.1	0.1	0.1	0.1	0.1	0.1	0.1	0.1	0.1	0.1	0.1	0.806667	0.741667	0.226316	0.1	0.1	0.1	0.1	0.1	0.1	0.837008	0.1	0.1	0.1	0.1	0.1	0.1	0.1	0.1	0.1	0.377612	0.404762	0.609091	0.107604	0.526919	0.132375
0.752527	0.294146	0.302925	0.271077	0.1	0.1	0.1	0.1	0.1	0.1	0.1	0.1	0.1	0.1	0.1	0.1	0.1	0.806667	0.741667	0.226316	0.1	0.1	0.58	0.133333	0.1	0.70024	0.106299	0.1	0.1	0.1	0.1	0.1	0.1	0.1	0.1	0.1	0.377612	0.404762	0.245455	0.107604	0.82545	0.138339
0.752527	0.294146	0.302925	0.271077	0.1	0.1	0.1	0.1	0.1	0.1	0.1	0.1	0.1	0.1	0.1	0.1	0.1	0.806667	0.741667	0.226316	0.1	0.1	0.58	0.133333	0.1	0.70024	0.106299	0.559574	0.166667	0.1	0.1	0.1	0.1	0.1	0.1	0.1	0.377612	0.404762	0.245455	0.107604	0.309858	0.561768
0.644404	0.375834	0.177862	0.474154	0.1	0.1	0.1	0.1	0.1	0.1	0.1	0.1	0.1	0.1	0.1	0.1	0.1	0.833333	0.716667	0.226316	0.1	0.1	0.1	0.1	0.1	0.1	0.824409	0.525532	0.111111	0.9	0.1	0.1	0.1	0.1	0.1	0.1	0.377612	0.9	0.609091	0.115608	0.189573	0.632481
0.644404	0.375834	0.177862	0.474154	0.1	0.1	0.1	0.1	0.1	0.1	0.1	0.1	0.1	0.1	0.1	0.1	0.1	0.833333	0.716667	0.226316	0.1	0.1	0.1	0.1	0.1	0.1	0.824409	0.593617	0.111111	0.9	0.1	0.1	0.1	0.1	0.1	0.1	0.377612	0.9	0.609091	0.115608	0.183886	0.617146
0.644404	0.375834	0.177862	0.474154	0.1	0.1	0.1	0.1	0.1	0.1	0.1	0.1	0.1	0.1	0.1	0.1	0.1	0.833333	0.716667	0.226316	0.1	0.1	0.1	0.1	0.1	0.1	0.824409	0.661702	0.111111	0.9	0.1	0.1	0.1	0.1	0.1	0.1	0.377612	0.9	0.609091	0.115608	0.177251	0.560916
0.644404	0.375834	0.177862	0.474154	0.1	0.1	0.1	0.1	0.1	0.1	0.1	0.1	0.1	0.1	0.1	0.1	0.1	0.833333	0.716667	0.226316	0.1	0.1	0.1	0.1	0.1	0.1	0.824409	0.729787	0.111111	0.9	0.1	0.1	0.1	0.1	0.1	0.1	0.377612	0.9	0.609091	0.115608	0.158294	0.401597
0.644404	0.375834	0.177862	0.474154	0.1	0.1	0.1	0.1	0.1	0.1	0.1	0.1	0.1	0.1	0.1	0.1	0.1	0.833333	0.716667	0.226316	0.1	0.1	0.1	0.1	0.1	0.1	0.824409	0.76383	0.111111	0.9	0.1	0.1	0.1	0.1	0.1	0.1	0.377612	0.9	0.609091	0.115608	0.16019	0.404153
0.644404	0.375834	0.177862	0.474154	0.1	0.1	0.1	0.1	0.1	0.1	0.1	0.1	0.1	0.1	0.1	0.1	0.1	0.833333	0.716667	0.226316	0.1	0.1	0.1	0.1	0.1	0.820288	0.1021	0.525532	0.111111	0.9	0.1	0.1	0.1	0.1	0.1	0.1	0.377612	0.9	0.172727	0.115608	0.299052	0.228647
0.644404	0.375834	0.177862	0.474154	0.1	0.1	0.1	0.1	0.1	0.1	0.1	0.1	0.1	0.1	0.1	0.1	0.1	0.833333	0.716667	0.226316	0.1	0.1	0.1	0.1	0.1	0.820288	0.1021	0.559574	0.111111	0.9	0.1	0.1	0.1	0.1	0.1	0.1	0.377612	0.9	0.172727	0.115608	0.266493	0.232907
0.644404	0.375834	0.177862	0.474154	0.1	0.1	0.1	0.1	0.1	0.1	0.1	0.1	0.1	0.1	0.1	0.1	0.1	0.833333	0.716667	0.226316	0.1	0.1	0.1	0.1	0.1	0.820288	0.1021	0.593617	0.111111	0.9	0.1	0.1	0.1	0.1	0.1	0.1	0.377612	0.9	0.172727	0.115608	0.221327	0.340256
0.644404	0.375834	0.177862	0.474154	0.1	0.1	0.1	0.1	0.1	0.1	0.1	0.1	0.1	0.1	0.1	0.1	0.1	0.833333	0.716667	0.226316	0.1	0.1	0.1	0.1	0.1	0.820288	0.1021	0.62766	0.111111	0.9	0.1	0.1	0.1	0.1	0.1	0.1	0.377612	0.9	0.172727	0.115608	0.204265	0.349627
0.644404	0.375834	0.177862	0.474154	0.1	0.1	0.1	0.1	0.1	0.1	0.1	0.1	0.1	0.1	0.1	0.1	0.1	0.833333	0.716667	0.226316	0.1	0.1	0.1	0.1	0.1	0.820288	0.1021	0.661702	0.111111	0.9	0.1	0.1	0.1	0.1	0.1	0.1	0.377612	0.9	0.172727	0.115608	0.198104	0.392226
0.644404	0.375834	0.177862	0.474154	0.1	0.1	0.1	0.1	0.1	0.1	0.1	0.1	0.1	0.1	0.1	0.1	0.1	0.833333	0.716667	0.226316	0.1	0.1	0.1	0.1	0.1	0.820288	0.1021	0.729787	0.111111	0.9	0.1	0.1	0.1	0.1	0.1	0.1	0.377612	0.9	0.172727	0.115608	0.177014	0.433972
0.76509	0.360585	0.137519	0.100246	0.109756	0.1	0.1	0.1	0.1	0.1	0.1	0.1	0.1	0.1	0.1	0.1	0.1	0.7	0.6	0.226316	0.1	0.1	0.1	0.1	0.1	0.70024	0.106299	0.491489	0.233333	0.1	0.1	0.1	0.1	0.1	0.1	0.1	0.153731	0.17619	0.1	0.107604	0.448341	0.406709
0.731769	0.359769	0.141553	0.215077	0.109756	0.1	0.1	0.1	0.1	0.1	0.1	0.1	0.1	0.1	0.1	0.1	0.1	0.7	0.6	0.226316	0.1	0.1	0.1	0.1	0.1	0.70024	0.106299	0.525532	0.233333	0.1	0.1	0.1	0.1	0.1	0.1	0.1	0.153731	0.17619	0.1	0.107604	0.413744	0.468903
0.395736	0.801974	0.222239	0.268615	0.14078	0.19869	0.1	0.1	0.1	0.1	0.1	0.1	0.1	0.1	0.145867	0.146061	0.393333	0.833333	0.65	0.310526	0.1	0.1	0.864444	0.133333	0.1	0.897119	0.1021	0.559574	0.144444	0.9	0.1	0.1	0.1	0.1	0.1	0.1	0.377612	0.9	0.172727	0.115608	0.196445	0.370075
0.381014	0.788359	0.226273	0.274154	0.13961	0.30524	0.1	0.1	0.1	0.1	0.1	0.1	0.1	0.1	0.1448	0.138788	0.446667	0.833333	0.65	0.310526	0.1	0.1	0.864444	0.133333	0.1	0.897119	0.1021	0.559574	0.144444	0.9	0.1	0.1	0.1	0.1	0.1	0.1	0.377612	0.9	0.172727	0.115608	0.201896	0.366667
0.354074	0.785636	0.226273	0.274154	0.138439	0.444978	0.1	0.1	0.1	0.1	0.1	0.1	0.1	0.1	0.148	0.119394	0.42	0.833333	0.65	0.310526	0.1	0.1	0.864444	0.133333	0.1	0.897119	0.1021	0.559574	0.144444	0.9	0.1	0.1	0.1	0.1	0.1	0.1	0.377612	0.9	0.172727	0.115608	0.235071	0.335996
0.792238	0.218993	0.173828	0.286462	0.222927	0.1	0.1	0.1	0.1	0.1	0.1	0.1	0.1	0.1	0.1	0.1	0.1	0.833333	0.65	0.268421	0.1	0.1	0.1	0.1	0.1	0.1	0.790814	0.559574	0.233333	0.1	0.1	0.1	0.1	0.1	0.1	0.1	0.377612	0.328571	0.754545	0.104962	0.254028	0.486794
0.792238	0.218993	0.173828	0.286462	0.222927	0.1	0.1	0.1	0.1	0.1	0.1	0.1	0.1	0.1	0.1	0.1	0.1	0.833333	0.65	0.268421	0.1	0.1	0.1	0.1	0.1	0.1	0.790814	0.58	0.233333	0.1	0.1	0.1	0.1	0.1	0.1	0.1	0.377612	0.328571	0.754545	0.104962	0.26019	0.615442
0.792238	0.218993	0.173828	0.286462	0.222927	0.1	0.1	0.1	0.1	0.1	0.1	0.1	0.1	0.1	0.1	0.1	0.1	0.833333	0.65	0.268421	0.1	0.1	0.1	0.1	0.1	0.1	0.790814	0.593617	0.233333	0.1	0.1	0.1	0.1	0.1	0.1	0.1	0.377612	0.328571	0.754545	0.104962	0.304739	0.603514
0.792238	0.218993	0.173828	0.286462	0.222927	0.1	0.1	0.1	0.1	0.1	0.1	0.1	0.1	0.1	0.1	0.1	0.1	0.833333	0.65	0.268421	0.1	0.1	0.1	0.1	0.1	0.1	0.790814	0.607234	0.233333	0.1	0.1	0.1	0.1	0.1	0.1	0.1	0.377612	0.328571	0.754545	0.104962	0.394787	0.38115
0.792238	0.218993	0.173828	0.286462	0.222927	0.1	0.1	0.1	0.1	0.1	0.1	0.1	0.1	0.1	0.1	0.1	0.1	0.833333	0.65	0.268421	0.1	0.1	0.1	0.1	0.1	0.1	0.790814	0.620851	0.233333	0.1	0.1	0.1	0.1	0.1	0.1	0.1	0.377612	0.328571	0.754545	0.104962	0.44455	0.262726
0.809386	0.249217	0.173828	0.198462	0.1	0.1	0.1	0.1	0.1	0.1	0.1	0.1	0.1	0.1	0.1	0.1	0.1	0.766667	0.716667	0.226316	0.1	0.1	0.1	0.1	0.1	0.1	0.824409	0.491489	0.233333	0.9	0.1	0.1	0.1	0.343478	0.233333	0.1	0.750746	0.9	0.609091	0.107604	0.301896	0.287433
0.809386	0.249217	0.173828	0.198462	0.1	0.1	0.1	0.1	0.1	0.1	0.1	0.1	0.1	0.1	0.1	0.1	0.1	0.766667	0.716667	0.226316	0.1	0.1	0.1	0.1	0.1	0.1	0.824409	0.508511	0.233333	0.9	0.1	0.1	0.1	0.343478	0.233333	0.1	0.750746	0.9	0.609091	0.107604	0.36673	0.44164
0.809386	0.249217	0.173828	0.198462	0.1	0.1	0.1	0.1	0.1	0.1	0.1	0.1	0.1	0.1	0.1	0.1	0.1	0.766667	0.716667	0.226316	0.1	0.1	0.1	0.1	0.1	0.1	0.824409	0.525532	0.233333	0.9	0.1	0.1	0.1	0.343478	0.233333	0.1	0.750746	0.9	0.609091	0.107604	0.421801	0.330884
0.809386	0.249217	0.173828	0.198462	0.1	0.1	0.1	0.1	0.1	0.1	0.1	0.1	0.1	0.1	0.1	0.1	0.1	0.766667	0.716667	0.226316	0.1	0.1	0.1	0.1	0.1	0.1	0.824409	0.539149	0.233333	0.9	0.1	0.1	0.1	0.343478	0.233333	0.1	0.750746	0.9	0.609091	0.107604	0.434597	0.233759
0.809386	0.249217	0.173828	0.198462	0.1	0.1	0.1	0.1	0.1	0.1	0.1	0.1	0.1	0.1	0.1	0.1	0.1	0.766667	0.716667	0.226316	0.1	0.1	0.1	0.1	0.1	0.1	0.824409	0.539149	0.233333	0.9	0.1	0.1	0.1	0.343478	0.233333	0.1	0.750746	0.9	0.609091	0.107604	0.458768	0.22524
0.71065	0.388087	0.181896	0.22	0.1	0.1	0.1	0.1	0.1	0.1	0.1	0.1	0.1	0.1	0.1	0.1	0.1	0.766667	0.716667	0.226316	0.1	0.1	0.1	0.1	0.1	0.1	0.824409	0.491489	0.233333	0.9	0.1	0.1	0.1	0.343478	0.233333	0.1	0.750746	0.9	0.609091	0.107604	0.523223	0.269542
0.71065	0.388087	0.181896	0.22	0.1	0.1	0.1	0.1	0.1	0.1	0.1	0.1	0.1	0.1	0.1	0.1	0.1	0.766667	0.716667	0.226316	0.1	0.1	0.1	0.1	0.1	0.1	0.824409	0.525532	0.233333	0.9	0.1	0.1	0.1	0.343478	0.233333	0.1	0.750746	0.9	0.609091	0.107604	0.538389	0.354739
0.71065	0.388087	0.181896	0.22	0.1	0.1	0.1	0.1	0.1	0.1	0.1	0.1	0.1	0.1	0.1	0.1	0.1	0.766667	0.716667	0.226316	0.1	0.1	0.1	0.1	0.1	0.1	0.824409	0.559574	0.233333	0.9	0.1	0.1	0.1	0.343478	0.233333	0.1	0.750746	0.9	0.609091	0.107604	0.562085	0.289989
0.71065	0.388087	0.181896	0.22	0.1	0.1	0.1	0.1	0.1	0.1	0.1	0.1	0.1	0.1	0.1	0.1	0.1	0.766667	0.716667	0.226316	0.1	0.1	0.1	0.1	0.1	0.1	0.824409	0.593617	0.233333	0.9	0.1	0.1	0.1	0.343478	0.233333	0.1	0.750746	0.9	0.609091	0.107604	0.551185	0.287433
0.71065	0.388087	0.181896	0.22	0.1	0.1	0.1	0.1	0.1	0.1	0.1	0.1	0.1	0.1	0.1	0.1	0.1	0.766667	0.716667	0.226316	0.1	0.1	0.1	0.1	0.1	0.1	0.824409	0.62766	0.233333	0.9	0.1	0.1	0.1	0.343478	0.233333	0.1	0.750746	0.9	0.609091	0.107604	0.548815	0.273802
0.71065	0.388087	0.181896	0.22	0.1	0.1	0.1	0.1	0.1	0.1	0.1	0.1	0.1	0.1	0.1	0.1	0.1	0.766667	0.716667	0.226316	0.1	0.1	0.1	0.1	0.1	0.1	0.824409	0.661702	0.233333	0.9	0.1	0.1	0.1	0.343478	0.233333	0.1	0.750746	0.9	0.609091	0.107604	0.534123	0.276358
0.681047	0.383186	0.165759	0.334462	0.1	0.1	0.1	0.1	0.1	0.1	0.1	0.1	0.1	0.1	0.1	0.1	0.1	0.766667	0.716667	0.226316	0.1	0.1	0.1	0.1	0.1	0.1	0.824409	0.559574	0.233333	0.9	0.1	0.1	0.1	0.343478	0.233333	0.1	0.750746	0.9	0.609091	0.107604	0.223223	0.393078
0.681047	0.383186	0.165759	0.334462	0.1	0.1	0.1	0.1	0.1	0.1	0.1	0.1	0.1	0.1	0.1	0.1	0.1	0.766667	0.716667	0.226316	0.1	0.1	0.1	0.1	0.1	0.1	0.824409	0.593617	0.233333	0.9	0.1	0.1	0.1	0.343478	0.233333	0.1	0.750746	0.9	0.609091	0.107604	0.345024	0.422897
0.681047	0.383186	0.165759	0.334462	0.1	0.1	0.1	0.1	0.1	0.1	0.1	0.1	0.1	0.1	0.1	0.1	0.1	0.766667	0.716667	0.226316	0.1	0.1	0.1	0.1	0.1	0.1	0.824409	0.62766	0.233333	0.9	0.1	0.1	0.1	0.343478	0.233333	0.1	0.750746	0.9	0.609091	0.107604	0.396209	0.380298
0.681047	0.383186	0.165759	0.334462	0.1	0.1	0.1	0.1	0.1	0.1	0.1	0.1	0.1	0.1	0.1	0.1	0.1	0.766667	0.716667	0.226316	0.1	0.1	0.1	0.1	0.1	0.1	0.824409	0.661702	0.233333	0.9	0.1	0.1	0.1	0.343478	0.233333	0.1	0.750746	0.9	0.609091	0.107604	0.443602	0.252503
0.681047	0.383186	0.165759	0.334462	0.1	0.1	0.1	0.1	0.1	0.1	0.1	0.1	0.1	0.1	0.1	0.1	0.1	0.766667	0.716667	0.226316	0.1	0.1	0.1	0.1	0.1	0.1	0.824409	0.695745	0.233333	0.9	0.1	0.1	0.1	0.343478	0.233333	0.1	0.750746	0.9	0.609091	0.107604	0.440758	0.247391
0.644404	0.375834	0.177862	0.474154	0.1	0.1	0.1	0.1	0.1	0.1	0.1	0.1	0.1	0.1	0.1	0.1	0.1	0.766667	0.716667	0.226316	0.1	0.1	0.1	0.1	0.1	0.1	0.824409	0.525532	0.233333	0.9	0.1	0.1	0.1	0.343478	0.233333	0.1	0.750746	0.9	0.609091	0.107604	0.180095	0.635889
0.644404	0.375834	0.177862	0.474154	0.1	0.1	0.1	0.1	0.1	0.1	0.1	0.1	0.1	0.1	0.1	0.1	0.1	0.766667	0.716667	0.226316	0.1	0.1	0.1	0.1	0.1	0.1	0.824409	0.593617	0.233333	0.9	0.1	0.1	0.1	0.343478	0.233333	0.1	0.750746	0.9	0.609091	0.107604	0.175829	0.616294
0.644404	0.375834	0.177862	0.474154	0.1	0.1	0.1	0.1	0.1	0.1	0.1	0.1	0.1	0.1	0.1	0.1	0.1	0.766667	0.716667	0.226316	0.1	0.1	0.1	0.1	0.1	0.1	0.824409	0.661702	0.233333	0.9	0.1	0.1	0.1	0.343478	0.233333	0.1	0.750746	0.9	0.609091	0.107604	0.169194	0.557508
0.644404	0.375834	0.177862	0.474154	0.1	0.1	0.1	0.1	0.1	0.1	0.1	0.1	0.1	0.1	0.1	0.1	0.1	0.766667	0.716667	0.226316	0.1	0.1	0.1	0.1	0.1	0.1	0.824409	0.729787	0.233333	0.9	0.1	0.1	0.1	0.343478	0.233333	0.1	0.750746	0.9	0.609091	0.107604	0.159242	0.409265
0.644404	0.375834	0.177862	0.474154	0.1	0.1	0.1	0.1	0.1	0.1	0.1	0.1	0.1	0.1	0.1	0.1	0.1	0.766667	0.716667	0.226316	0.1	0.1	0.1	0.1	0.1	0.1	0.824409	0.76383	0.233333	0.9	0.1	0.1	0.1	0.343478	0.233333	0.1	0.750746	0.9	0.609091	0.107604	0.163033	0.397338
0.774729	0.27917	0.181896	0.247692	0.1	0.1	0.1	0.1	0.1	0.1	0.1	0.1	0.1	0.1	0.1	0.1	0.1	0.766667	0.783333	0.217895	0.1	0.1	0.58	0.116667	0.1	0.772269	0.10294	0.559574	0.233333	0.1	0.1	0.1	0.1	0.1	0.1	0.1	0.750746	0.9	0.187273	0.104962	0.346445	0.645261
0.770397	0.257386	0.165759	0.272308	0.197561	0.1	0.1	0.1	0.1	0.1	0.1	0.1	0.1	0.188889	0.9	0.221212	0.1	0.766667	0.816667	0.226316	0.1	0.1	0.1	0.1	0.1	0.1	0.874803	0.586809	0.122222	0.1	0.1	0.1	0.1	0.1	0.1	0.1	0.750746	0.9	0.609091	0.104962	0.23128	0.531097
0.583935	0.620626	0.278719	0.100308	0.133171	0.1	0.1	0.1	0.1	0.1	0.1	0.1	0.1	0.1	0.153333	0.221212	0.233333	0.7	0.766667	0.226316	0.1	0.366667	0.1	0.1	0.1	0.67623	0.107139	0.593617	0.122222	0.1	0.1	0.1	0.1	0.1	0.1	0.1	0.377612	0.404762	0.26	0.107604	0.359763	0.491054
0.538706	0.689789	0.262582	0.100308	0.135122	0.1	0.1	0.1	0.1	0.1	0.1	0.1	0.1	0.1	0.142667	0.172727	0.198667	0.7	0.766667	0.226316	0.1	0.366667	0.1	0.1	0.1	0.67623	0.107139	0.593617	0.122222	0.1	0.1	0.1	0.1	0.1	0.1	0.1	0.377612	0.404762	0.26	0.107604	0.341848	0.661448
0.575103	0.629884	0.339233	0.100308	0.133171	0.1	0.1	0.1	0.1	0.1	0.1	0.1	0.1	0.1	0.153333	0.19697	0.241333	0.7	0.766667	0.226316	0.1	0.366667	0.1	0.1	0.1	0.67623	0.107139	0.593617	0.122222	0.1	0.1	0.1	0.1	0.1	0.1	0.1	0.377612	0.404762	0.26	0.107604	0.397062	0.569436
0.508332	0.730361	0.335199	0.100308	0.137073	0.1	0.1	0.1	0.1	0.1	0.1	0.1	0.1	0.1	0.153333	0.19697	0.217333	0.7	0.766667	0.226316	0.1	0.366667	0.1	0.1	0.1	0.67623	0.107139	0.593617	0.122222	0.1	0.1	0.1	0.1	0.1	0.1	0.1	0.377612	0.404762	0.26	0.107604	0.361185	0.647817
0.538827	0.687066	0.302925	0.100246	0.133171	0.1	0.1	0.1	0.1	0.1	0.1	0.1	0.1	0.1	0.153333	0.221212	0.233333	0.7	0.716667	0.226316	0.1	0.366667	0.1	0.1	0.1	0.67623	0.107139	0.525532	0.111111	0.1	0.1	0.1	0.1	0.1	0.1	0.1	0.377612	0.404762	0.26	0.107604	0.343355	0.578637
0.538827	0.687066	0.302925	0.100246	0.133171	0.1	0.1	0.1	0.1	0.1	0.1	0.1	0.1	0.1	0.153333	0.221212	0.233333	0.7	0.716667	0.226316	0.1	0.366667	0.1	0.1	0.1	0.67623	0.107139	0.525532	0.122222	0.1	0.1	0.1	0.1	0.1	0.1	0.1	0.377612	0.404762	0.26	0.107604	0.369626	0.639382
0.538827	0.687066	0.302925	0.100246	0.133171	0.1	0.1	0.1	0.1	0.1	0.1	0.1	0.1	0.1	0.153333	0.221212	0.233333	0.7	0.716667	0.226316	0.1	0.366667	0.1	0.1	0.1	0.67623	0.107139	0.525532	0.133333	0.1	0.1	0.1	0.1	0.1	0.1	0.1	0.377612	0.404762	0.26	0.107604	0.364844	0.657785
0.538827	0.687066	0.302925	0.100246	0.133171	0.1	0.1	0.1	0.1	0.1	0.1	0.1	0.1	0.1	0.153333	0.221212	0.233333	0.7	0.716667	0.226316	0.1	0.366667	0.1	0.1	0.1	0.67623	0.107139	0.525532	0.144444	0.1	0.1	0.1	0.1	0.1	0.1	0.1	0.377612	0.404762	0.26	0.107604	0.37272	0.63606
0.538827	0.687066	0.302925	0.100246	0.133171	0.1	0.1	0.1	0.1	0.1	0.1	0.1	0.1	0.1	0.153333	0.221212	0.233333	0.7	0.716667	0.226316	0.1	0.366667	0.1	0.1	0.1	0.67623	0.107139	0.593617	0.111111	0.1	0.1	0.1	0.1	0.1	0.1	0.1	0.377612	0.404762	0.26	0.107604	0.366147	0.577529
0.538827	0.687066	0.302925	0.100246	0.133171	0.1	0.1	0.1	0.1	0.1	0.1	0.1	0.1	0.1	0.153333	0.221212	0.233333	0.7	0.716667	0.226316	0.1	0.366667	0.1	0.1	0.1	0.67623	0.107139	0.593617	0.122222	0.1	0.1	0.1	0.1	0.1	0.1	0.1	0.377612	0.404762	0.26	0.107604	0.352227	0.600192
0.538827	0.687066	0.302925	0.100246	0.133171	0.1	0.1	0.1	0.1	0.1	0.1	0.1	0.1	0.1	0.153333	0.221212	0.233333	0.7	0.716667	0.226316	0.1	0.366667	0.1	0.1	0.1	0.67623	0.107139	0.593617	0.133333	0.1	0.1	0.1	0.1	0.1	0.1	0.1	0.377612	0.404762	0.26	0.107604	0.366517	0.62311
0.538827	0.687066	0.302925	0.100246	0.133171	0.1	0.1	0.1	0.1	0.1	0.1	0.1	0.1	0.1	0.153333	0.221212	0.233333	0.7	0.716667	0.226316	0.1	0.366667	0.1	0.1	0.1	0.67623	0.107139	0.593617	0.144444	0.1	0.1	0.1	0.1	0.1	0.1	0.1	0.377612	0.404762	0.26	0.107604	0.364886	0.675932
0.538827	0.687066	0.302925	0.100246	0.133171	0.1	0.1	0.1	0.1	0.1	0.1	0.1	0.1	0.1	0.153333	0.221212	0.233333	0.7	0.716667	0.226316	0.1	0.366667	0.1	0.1	0.1	0.67623	0.107139	0.661702	0.111111	0.1	0.1	0.1	0.1	0.1	0.1	0.1	0.377612	0.404762	0.26	0.107604	0.304995	0.721597
0.538827	0.687066	0.302925	0.100246	0.133171	0.1	0.1	0.1	0.1	0.1	0.1	0.1	0.1	0.1	0.153333	0.221212	0.233333	0.7	0.716667	0.226316	0.1	0.366667	0.1	0.1	0.1	0.67623	0.107139	0.661702	0.122222	0.1	0.1	0.1	0.1	0.1	0.1	0.1	0.377612	0.404762	0.26	0.107604	0.301659	0.725517
0.538827	0.687066	0.302925	0.100246	0.133171	0.1	0.1	0.1	0.1	0.1	0.1	0.1	0.1	0.1	0.153333	0.221212	0.233333	0.7	0.716667	0.226316	0.1	0.366667	0.1	0.1	0.1	0.67623	0.107139	0.661702	0.133333	0.1	0.1	0.1	0.1	0.1	0.1	0.1	0.377612	0.404762	0.26	0.107604	0.30691	0.636997
0.538827	0.687066	0.302925	0.100246	0.133171	0.1	0.1	0.1	0.1	0.1	0.1	0.1	0.1	0.1	0.153333	0.221212	0.233333	0.7	0.716667	0.226316	0.1	0.366667	0.1	0.1	0.1	0.67623	0.107139	0.661702	0.144444	0.1	0.1	0.1	0.1	0.1	0.1	0.1	0.377612	0.404762	0.26	0.107604	0.304014	0.645857
0.538827	0.687066	0.302925	0.100246	0.133171	0.1	0.1	0.1	0.1	0.1	0.1	0.1	0.1	0.1	0.153333	0.221212	0.233333	0.7	0.716667	0.226316	0.1	0.366667	0.1	0.1	0.1	0.67623	0.107139	0.729787	0.111111	0.1	0.1	0.1	0.1	0.1	0.1	0.1	0.377612	0.404762	0.26	0.107604	0.326867	0.670394
0.538827	0.687066	0.302925	0.100246	0.133171	0.1	0.1	0.1	0.1	0.1	0.1	0.1	0.1	0.1	0.153333	0.221212	0.233333	0.7	0.716667	0.226316	0.1	0.366667	0.1	0.1	0.1	0.67623	0.107139	0.729787	0.122222	0.1	0.1	0.1	0.1	0.1	0.1	0.1	0.377612	0.404762	0.26	0.107604	0.300014	0.712907
0.538827	0.687066	0.302925	0.100246	0.133171	0.1	0.1	0.1	0.1	0.1	0.1	0.1	0.1	0.1	0.153333	0.221212	0.233333	0.7	0.716667	0.226316	0.1	0.366667	0.1	0.1	0.1	0.67623	0.107139	0.729787	0.133333	0.1	0.1	0.1	0.1	0.1	0.1	0.1	0.377612	0.404762	0.26	0.107604	0.303483	0.62558
0.538827	0.687066	0.302925	0.100246	0.133171	0.1	0.1	0.1	0.1	0.1	0.1	0.1	0.1	0.1	0.153333	0.221212	0.233333	0.7	0.716667	0.226316	0.1	0.366667	0.1	0.1	0.1	0.67623	0.107139	0.729787	0.144444	0.1	0.1	0.1	0.1	0.1	0.1	0.1	0.377612	0.404762	0.26	0.107604	0.299972	0.713589
0.395736	0.801974	0.222239	0.268615	0.14078	0.19869	0.1	0.1	0.1	0.1	0.1	0.1	0.1	0.1	0.145867	0.146061	0.393333	0.7	0.608333	0.310526	0.1	0.1	0.864444	0.133333	0.1	0.9	0.1021	0.559574	0.144444	0.9	0.1	0.1	0.1	0.1	0.1	0.1	0.377612	0.404762	0.172727	0.107604	0.196445	0.370075
0.381014	0.788359	0.226273	0.274154	0.13961	0.30524	0.1	0.1	0.1	0.1	0.1	0.1	0.1	0.1	0.1448	0.138788	0.446667	0.7	0.608333	0.310526	0.1	0.1	0.864444	0.133333	0.1	0.9	0.1021	0.559574	0.144444	0.9	0.1	0.1	0.1	0.1	0.1	0.1	0.377612	0.404762	0.172727	0.107604	0.201896	0.366667
0.354074	0.785636	0.226273	0.274154	0.138439	0.444978	0.1	0.1	0.1	0.1	0.1	0.1	0.1	0.1	0.148	0.119394	0.42	0.7	0.608333	0.310526	0.1	0.1	0.864444	0.133333	0.1	0.9	0.1021	0.559574	0.144444	0.9	0.1	0.1	0.1	0.1	0.1	0.1	0.377612	0.9	0.172727	0.115608	0.235071	0.335996
0.599639	0.409871	0.294856	0.530769	0.1	0.1	0.1	0.1	0.1	0.1	0.1	0.1	0.1	0.1	0.206667	0.342424	0.1	0.7	0.855	0.175789	0.1	0.366667	0.58	0.133333	0.1	0.580192	0.105459	0.58	0.102222	0.1	0.1	0.1	0.1	0.1	0.1	0.1	0.377612	0.404762	0.172727	0.107604	0.378199	0.240575
0.599639	0.409871	0.294856	0.530769	0.1	0.1	0.1	0.1	0.1	0.1	0.1	0.1	0.1	0.1	0.206667	0.342424	0.1	0.7	0.855	0.175789	0.1	0.366667	0.58	0.133333	0.1	0.580192	0.105459	0.648085	0.102222	0.1	0.1	0.1	0.1	0.1	0.1	0.1	0.377612	0.404762	0.172727	0.107604	0.306161	0.347071
0.599639	0.409871	0.294856	0.530769	0.1	0.1	0.1	0.1	0.1	0.1	0.1	0.1	0.1	0.1	0.206667	0.342424	0.1	0.7	0.855	0.175789	0.1	0.366667	0.58	0.133333	0.1	0.580192	0.105459	0.71617	0.102222	0.1	0.1	0.1	0.1	0.1	0.1	0.1	0.377612	0.404762	0.172727	0.107604	0.282938	0.387114
0.704693	0.2887	0.153656	0.469231	0.1	0.1	0.1	0.1	0.1	0.1	0.1	0.1	0.1	0.1	0.1	0.1	0.1	0.633333	0.808333	0.184211	0.1	0.1	0.1	0.1	0.1	0.1	0.870604	0.695745	0.233333	0.9	0.1	0.1	0.1	0.1	0.1	0.1	0.750746	0.328571	0.463636	0.102001	0.275829	0.354739
0.70343	0.295779	0.15769	0.444615	0.1	0.1	0.1	0.1	0.1	0.1	0.26	0.1	0.1	0.1	0.1	0.1	0.1	0.633333	0.808333	0.184211	0.1	0.1	0.1	0.1	0.1	0.1	0.870604	0.695745	0.233333	0.9	0.1	0.1	0.1	0.1	0.1	0.1	0.750746	0.328571	0.463636	0.102001	0.320379	0.388818
0.810686	0.279714	0.130661	0.1008	0.19561	0.1	0.1	0.1	0.1	0.1	0.1	0.1	0.1	0.1	0.153333	0.269697	0.1	0.7	0.7205	0.184211	0.1	0.1	0.1	0.1	0.1	0.1	0.826341	0.1	0.1	0.1	0.1	0.1	0.1	0.1	0.1	0.1	0.377612	0.404762	0.209091	0.1004	0.456398	0.289137
0.810686	0.279714	0.130661	0.1008	0.19561	0.1	0.1	0.1	0.1	0.1	0.1	0.1	0.1	0.1	0.153333	0.269697	0.1	0.7	0.7205	0.184211	0.1	0.1	0.1	0.1	0.1	0.628211	0.105879	0.518723	0.166667	0.1	0.1	0.1	0.1	0.1	0.1	0.1	0.377612	0.404762	0.209091	0.1004	0.536967	0.267838
0.576534	0.366304	0.375542	0.696923	0.1	0.1	0.1	0.1	0.1	0.1	0.1	0.1	0.1	0.1	0.1	0.1	0.1	0.833333	0.808333	0.184211	0.1	0.9	0.295556	0.100056	0.1	0.1	0.870604	0.559574	0.233333	0.9	0.1	0.1	0.1	0.1	0.1	0.1	0.750746	0.9	0.463636	0.102001	0.335071	0.123003
0.576534	0.366304	0.375542	0.696923	0.1	0.1	0.1	0.1	0.1	0.1	0.1	0.1	0.1	0.1	0.1	0.1	0.1	0.833333	0.808333	0.184211	0.1	0.9	0.295556	0.100056	0.1	0.1	0.870604	0.62766	0.233333	0.9	0.1	0.1	0.1	0.1	0.1	0.1	0.750746	0.9	0.463636	0.102001	0.290521	0.148562
0.576534	0.366304	0.375542	0.696923	0.1	0.1	0.1	0.1	0.1	0.1	0.1	0.1	0.1	0.1	0.1	0.1	0.1	0.833333	0.808333	0.184211	0.1	0.9	0.295556	0.100056	0.1	0.1	0.870604	0.661702	0.233333	0.9	0.1	0.1	0.1	0.1	0.1	0.1	0.750746	0.9	0.463636	0.102001	0.291469	0.266986
0.576534	0.366304	0.375542	0.696923	0.1	0.1	0.1	0.1	0.1	0.1	0.1	0.1	0.1	0.1	0.1	0.1	0.1	0.833333	0.808333	0.184211	0.1	0.9	0.295556	0.100056	0.1	0.1	0.870604	0.695745	0.233333	0.9	0.1	0.1	0.1	0.1	0.1	0.1	0.750746	0.9	0.463636	0.102001	0.280095	0.39393
0.576534	0.366304	0.375542	0.696923	0.1	0.1	0.1	0.1	0.1	0.1	0.1	0.1	0.1	0.1	0.1	0.1	0.1	0.833333	0.808333	0.184211	0.1	0.9	0.295556	0.100056	0.1	0.1	0.870604	0.729787	0.233333	0.9	0.1	0.1	0.1	0.1	0.1	0.1	0.750746	0.9	0.463636	0.102001	0.255924	0.308733
0.576534	0.366304	0.375542	0.696923	0.1	0.1	0.1	0.1	0.1	0.1	0.1	0.1	0.1	0.1	0.1	0.1	0.1	0.833333	0.808333	0.184211	0.1	0.9	0.295556	0.100056	0.1	0.1	0.870604	0.76383	0.233333	0.9	0.1	0.1	0.1	0.1	0.1	0.1	0.750746	0.9	0.463636	0.102001	0.236493	0.220128
0.576534	0.366304	0.375542	0.696923	0.1	0.1	0.1	0.1	0.1	0.1	0.1	0.1	0.1	0.1	0.1	0.1	0.1	0.833333	0.808333	0.184211	0.1	0.9	0.295556	0.100056	0.1	0.1	0.870604	0.831915	0.233333	0.9	0.1	0.1	0.1	0.1	0.1	0.1	0.750746	0.9	0.463636	0.102001	0.192891	0.184345
0.576534	0.366304	0.375542	0.696923	0.1	0.1	0.1	0.1	0.1	0.1	0.1	0.1	0.1	0.1	0.1	0.1	0.1	0.833333	0.808333	0.184211	0.1	0.9	0.295556	0.100056	0.1	0.1	0.870604	0.9	0.233333	0.9	0.1	0.1	0.1	0.1	0.1	0.1	0.750746	0.9	0.463636	0.102001	0.164455	0.123003
0.71065	0.388087	0.181896	0.22	0.1	0.1	0.1	0.1	0.1	0.1	0.1	0.1	0.1	0.1	0.1	0.1	0.1	0.766667	0.71	0.226316	0.1	0.1	0.1	0.1	0.1	0.1	0.82105	0.525532	0.233333	0.9	0.1	0.1	0.1	0.343478	0.233333	0.1	0.750746	0.9	0.609091	0.107604	0.541706	0.349627
0.79639	0.262832	0.161725	0.167692	0.1	0.1	0.1	0.1	0.393333	0.1	0.5	0.1	0.1	0.1	0.1	0.1	0.9	0.833333	0.7205	0.310526	0.1	0.633333	0.1	0.1	0.1	0.820288	0.106299	0.53234	0.166667	0.1	0.1	0.1	0.1	0.1	0.1	0.1	0.377612	0.404762	0.172727	0.102801	0.572512	0.306177
0.79639	0.262832	0.161725	0.167692	0.1	0.1	0.1	0.1	0.393333	0.1	0.5	0.1	0.1	0.1	0.1	0.1	0.9	0.833333	0.7205	0.310526	0.1	0.633333	0.1	0.1	0.1	0.820288	0.106299	0.53234	0.166667	0.1	0.1	0.1	0.1	0.1	0.1	0.1	0.377612	0.404762	0.172727	0.25968	0.488626	0.271246
0.79639	0.262832	0.161725	0.167692	0.1	0.1	0.1	0.1	0.393333	0.1	0.5	0.1	0.1	0.1	0.1	0.1	0.9	0.833333	0.7205	0.310526	0.1	0.633333	0.1	0.1	0.1	0.820288	0.106299	0.53234	0.166667	0.1	0.1	0.1	0.1	0.1	0.1	0.1	0.377612	0.404762	0.172727	0.9	0.488626	0.253355
0.79639	0.262832	0.161725	0.167692	0.1	0.1	0.1	0.1	0.393333	0.1	0.5	0.1	0.1	0.1	0.1	0.1	0.9	0.833333	0.7205	0.310526	0.1	0.633333	0.1	0.1	0.1	0.820288	0.106299	0.53234	0.9	0.1	0.1	0.1	0.1	0.1	0.1	0.1	0.377612	0.404762	0.172727	0.102801	0.359242	0.38115
0.79639	0.262832	0.161725	0.167692	0.1	0.1	0.1	0.1	0.393333	0.1	0.5	0.1	0.1	0.1	0.1	0.1	0.9	0.833333	0.7205	0.310526	0.1	0.633333	0.1	0.1	0.1	0.820288	0.106299	0.53234	0.9	0.1	0.1	0.1	0.1	0.1	0.1	0.1	0.377612	0.404762	0.172727	0.25968	0.318483	0.346219
0.79639	0.262832	0.161725	0.167692	0.1	0.1	0.1	0.1	0.393333	0.1	0.5	0.1	0.1	0.1	0.1	0.1	0.9	0.833333	0.7205	0.310526	0.1	0.633333	0.1	0.1	0.1	0.820288	0.106299	0.53234	0.9	0.1	0.1	0.1	0.1	0.1	0.1	0.1	0.377612	0.404762	0.172727	0.9	0.306161	0.301065
0.858845	0.1	0.165759	0.349846	0.1	0.1	0.1	0.1	0.1	0.1	0.34	0.1	0.1	0.1	0.1	0.1	0.1	0.9	0.716667	0.226316	0.1	0.1	0.1	0.1	0.1	0.1	0.824409	0.1	0.1	0.1	0.1	0.1	0.1	0.1	0.1	0.1	0.750746	0.9	0.609091	0.107604	0.419905	0.422897
0.858845	0.1	0.165759	0.349846	0.1	0.1	0.1	0.1	0.1	0.1	0.34	0.1	0.1	0.1	0.1	0.1	0.1	0.9	0.716667	0.226316	0.1	0.1	0.1	0.1	0.1	0.1	0.824409	0.610638	0.233333	0.9	0.1	0.1	0.1	0.482609	0.5	0.1	0.750746	0.9	0.609091	0.107604	0.372512	0.431416
0.858845	0.1	0.165759	0.349846	0.1	0.1	0.1	0.1	0.1	0.1	0.34	0.1	0.1	0.1	0.1	0.1	0.1	0.9	0.716667	0.226316	0.1	0.1	0.1	0.1	0.1	0.1	0.824409	0.610638	0.233333	0.9	0.1	0.1	0.1	0.621739	0.5	0.1	0.750746	0.9	0.609091	0.107604	0.348815	0.491054
0.858845	0.1	0.165759	0.349846	0.1	0.1	0.1	0.1	0.1	0.1	0.34	0.1	0.1	0.1	0.1	0.1	0.1	0.9	0.716667	0.226316	0.1	0.1	0.1	0.1	0.1	0.1	0.824409	0.610638	0.233333	0.9	0.1	0.1	0.1	0.76087	0.5	0.1	0.750746	0.9	0.609091	0.107604	0.325118	0.508094
0.858845	0.1	0.165759	0.349846	0.1	0.1	0.1	0.1	0.1	0.1	0.34	0.1	0.1	0.1	0.1	0.1	0.1	0.9	0.716667	0.226316	0.1	0.1	0.1	0.1	0.1	0.1	0.824409	0.610638	0.233333	0.9	0.1	0.1	0.1	0.9	0.5	0.1	0.750746	0.9	0.609091	0.107604	0.277725	0.550692
0.784296	0.243771	0.169793	0.296923	0.1	0.1	0.1	0.1	0.1	0.1	0.1	0.1	0.1	0.1	0.1	0.1	0.1	0.766667	0.716667	0.226316	0.1	0.1	0.1	0.1	0.1	0.1	0.824409	0.559574	0.233333	0.9	0.1	0.1	0.1	0.343478	0.233333	0.1	0.750746	0.9	0.609091	0.107604	0.321327	0.383706
0.741336	0.311028	0.169793	0.291385	0.1	0.1	0.1	0.1	0.1	0.1	0.1	0.1	0.1	0.1	0.1	0.1	0.1	0.766667	0.716667	0.226316	0.1	0.1	0.1	0.1	0.1	0.1	0.824409	0.593617	0.233333	0.9	0.1	0.1	0.1	0.343478	0.233333	0.1	0.750746	0.9	0.609091	0.107604	0.401896	0.416933
0.764621	0.317291	0.173828	0.197231	0.1	0.1	0.1	0.1	0.1	0.1	0.1	0.1	0.1	0.1	0.1	0.1	0.1	0.766667	0.716667	0.226316	0.1	0.1	0.1	0.1	0.1	0.1	0.824409	0.525532	0.233333	0.9	0.1	0.1	0.1	0.343478	0.233333	0.1	0.750746	0.9	0.609091	0.107604	0.525592	0.353035
0.612094	0.578148	0.345285	0.101538	0.1	0.1	0.1	0.1	0.1	0.1	0.1	0.1	0.1	0.1	0.1	0.1	0.1	0.833333	0.7205	0.163158	0.1	0.1	0.1	0.1	0.1	0.580192	0.104199	0.62766	0.103111	0.1	0.1	0.1	0.1	0.1	0.1	0.1	0.750746	0.9	0.209091	0.107604	0.398863	0.593291
0.585126	0.578148	0.344881	0.193538	0.1	0.1	0.1	0.1	0.1	0.1	0.1	0.1	0.1	0.1	0.1	0.1	0.1	0.833333	0.7205	0.163158	0.1	0.1	0.1	0.1	0.1	0.580192	0.104199	0.62766	0.103111	0.1	0.1	0.1	0.1	0.1	0.1	0.1	0.750746	0.9	0.209091	0.107604	0.329905	0.587327
0.543718	0.600204	0.346495	0.284615	0.1	0.1	0.1	0.1	0.1	0.1	0.1	0.1	0.1	0.1	0.1	0.1	0.1	0.833333	0.7205	0.163158	0.1	0.1	0.1	0.1	0.1	0.580192	0.104199	0.62766	0.103111	0.1	0.1	0.1	0.1	0.1	0.1	0.1	0.750746	0.9	0.209091	0.107604	0.277204	0.505538
0.665523	0.497822	0.340444	0.101662	0.1	0.1	0.1	0.1	0.1	0.1	0.1	0.1	0.1	0.1	0.1	0.1	0.1	0.833333	0.7205	0.163158	0.1	0.1	0.1	0.1	0.1	0.580192	0.104199	0.62766	0.103111	0.1	0.1	0.1	0.1	0.1	0.1	0.1	0.750746	0.9	0.209091	0.107604	0.40763	0.519169
0.643285	0.490742	0.331972	0.194769	0.1	0.1	0.1	0.1	0.1	0.1	0.1	0.1	0.1	0.1	0.1	0.1	0.1	0.833333	0.7205	0.163158	0.1	0.1	0.1	0.1	0.1	0.580192	0.104199	0.62766	0.103111	0.1	0.1	0.1	0.1	0.1	0.1	0.1	0.750746	0.9	0.209091	0.107604	0.337441	0.572843
0.624711	0.504357	0.343671	0.225538	0.1	0.1	0.1	0.1	0.1	0.1	0.1	0.1	0.1	0.1	0.1	0.1	0.1	0.833333	0.7205	0.163158	0.1	0.1	0.1	0.1	0.1	0.580192	0.104199	0.62766	0.103111	0.1	0.1	0.1	0.1	0.1	0.1	0.1	0.750746	0.9	0.209091	0.107604	0.319858	0.579659
0.723953	0.409871	0.342864	0.100862	0.1	0.1	0.1	0.1	0.1	0.1	0.1	0.1	0.1	0.1	0.1	0.1	0.1	0.833333	0.7205	0.163158	0.1	0.1	0.1	0.1	0.1	0.580192	0.104199	0.62766	0.103111	0.1	0.1	0.1	0.1	0.1	0.1	0.1	0.750746	0.9	0.209091	0.107604	0.271943	0.219276
0.700848	0.404969	0.344478	0.190462	0.1	0.1	0.1	0.1	0.1	0.1	0.1	0.1	0.1	0.1	0.1	0.1	0.1	0.833333	0.7205	0.163158	0.1	0.1	0.1	0.1	0.1	0.580192	0.104199	0.62766	0.103111	0.1	0.1	0.1	0.1	0.1	0.1	0.1	0.750746	0.9	0.209091	0.107604	0.301185	0.340256
0.676191	0.42757	0.346899	0.223077	0.1	0.1	0.1	0.1	0.1	0.1	0.1	0.1	0.1	0.1	0.1	0.1	0.1	0.833333	0.7205	0.163158	0.1	0.1	0.1	0.1	0.1	0.580192	0.104199	0.62766	0.103111	0.1	0.1	0.1	0.1	0.1	0.1	0.1	0.750746	0.9	0.209091	0.107604	0.308341	0.42886
0.678339	0.372294	0.165759	0.349846	0.1	0.1	0.1	0.1	0.1	0.1	0.34	0.1	0.1	0.1	0.1	0.1	0.1	0.833333	0.716667	0.226316	0.1	0.1	0.1	0.1	0.1	0.820288	0.1021	0.593617	0.111111	0.9	0.1	0.1	0.1	0.1	0.1	0.1	0.377612	0.9	0.172727	0.115608	0.333791	0.566028
0.784296	0.243771	0.169793	0.296923	0.1	0.1	0.1	0.1	0.1	0.1	0.1	0.1	0.1	0.1	0.1	0.1	0.1	0.766667	0.711667	0.226316	0.1	0.1	0.1	0.1	0.1	0.1	0.82189	0.525532	0.233333	0.9	0.1	0.1	0.1	0.343478	0.233333	0.1	0.750746	0.9	0.609091	0.107604	0.261611	0.237167
0.784296	0.243771	0.169793	0.296923	0.1	0.1	0.1	0.1	0.1	0.1	0.1	0.1	0.1	0.1	0.1	0.1	0.1	0.766667	0.711667	0.226316	0.1	0.1	0.1	0.1	0.1	0.1	0.82189	0.559574	0.233333	0.9	0.1	0.1	0.1	0.343478	0.233333	0.1	0.750746	0.9	0.609091	0.107604	0.320379	0.383706
0.784296	0.243771	0.169793	0.296923	0.1	0.1	0.1	0.1	0.1	0.1	0.1	0.1	0.1	0.1	0.1	0.1	0.1	0.766667	0.711667	0.226316	0.1	0.1	0.1	0.1	0.1	0.1	0.82189	0.593617	0.233333	0.9	0.1	0.1	0.1	0.343478	0.233333	0.1	0.750746	0.9	0.609091	0.107604	0.402844	0.22524
0.784296	0.243771	0.169793	0.296923	0.1	0.1	0.1	0.1	0.1	0.1	0.1	0.1	0.1	0.1	0.1	0.1	0.1	0.766667	0.711667	0.226316	0.1	0.1	0.1	0.1	0.1	0.1	0.82189	0.62766	0.233333	0.9	0.1	0.1	0.1	0.343478	0.233333	0.1	0.750746	0.9	0.609091	0.107604	0.456872	0.211608
0.784296	0.243771	0.169793	0.296923	0.1	0.1	0.1	0.1	0.1	0.1	0.1	0.1	0.1	0.1	0.1	0.1	0.1	0.766667	0.711667	0.226316	0.1	0.1	0.1	0.1	0.1	0.1	0.82189	0.661702	0.233333	0.9	0.1	0.1	0.1	0.343478	0.233333	0.1	0.750746	0.9	0.609091	0.107604	0.481517	0.192865
0.741336	0.311028	0.169793	0.291385	0.1	0.1	0.1	0.1	0.1	0.1	0.1	0.1	0.1	0.1	0.1	0.1	0.1	0.766667	0.711667	0.226316	0.1	0.1	0.1	0.1	0.1	0.1	0.82189	0.525532	0.233333	0.9	0.1	0.1	0.1	0.343478	0.233333	0.1	0.750746	0.9	0.609091	0.107604	0.305213	0.259318
0.741336	0.311028	0.169793	0.291385	0.1	0.1	0.1	0.1	0.1	0.1	0.1	0.1	0.1	0.1	0.1	0.1	0.1	0.766667	0.711667	0.226316	0.1	0.1	0.1	0.1	0.1	0.1	0.82189	0.559574	0.233333	0.9	0.1	0.1	0.1	0.343478	0.233333	0.1	0.750746	0.9	0.609091	0.107604	0.330806	0.284878
0.741336	0.311028	0.169793	0.291385	0.1	0.1	0.1	0.1	0.1	0.1	0.1	0.1	0.1	0.1	0.1	0.1	0.1	0.766667	0.711667	0.226316	0.1	0.1	0.1	0.1	0.1	0.1	0.82189	0.593617	0.233333	0.9	0.1	0.1	0.1	0.343478	0.233333	0.1	0.750746	0.9	0.609091	0.107604	0.350237	0.380298
0.741336	0.311028	0.169793	0.291385	0.1	0.1	0.1	0.1	0.1	0.1	0.1	0.1	0.1	0.1	0.1	0.1	0.1	0.766667	0.711667	0.226316	0.1	0.1	0.1	0.1	0.1	0.1	0.82189	0.62766	0.233333	0.9	0.1	0.1	0.1	0.343478	0.233333	0.1	0.750746	0.9	0.609091	0.107604	0.401896	0.416081
0.741336	0.311028	0.169793	0.291385	0.1	0.1	0.1	0.1	0.1	0.1	0.1	0.1	0.1	0.1	0.1	0.1	0.1	0.766667	0.711667	0.226316	0.1	0.1	0.1	0.1	0.1	0.1	0.82189	0.661702	0.233333	0.9	0.1	0.1	0.1	0.343478	0.233333	0.1	0.750746	0.9	0.609091	0.107604	0.447393	0.188605
0.71065	0.388087	0.181896	0.22	0.1	0.1	0.1	0.1	0.1	0.1	0.1	0.1	0.1	0.1	0.1	0.1	0.1	0.766667	0.711667	0.226316	0.1	0.1	0.1	0.1	0.1	0.1	0.82189	0.491489	0.233333	0.9	0.1	0.1	0.1	0.343478	0.233333	0.1	0.750746	0.9	0.609091	0.107604	0.521801	0.273802
0.71065	0.388087	0.181896	0.22	0.1	0.1	0.1	0.1	0.1	0.1	0.1	0.1	0.1	0.1	0.1	0.1	0.1	0.766667	0.711667	0.226316	0.1	0.1	0.1	0.1	0.1	0.1	0.82189	0.525532	0.233333	0.9	0.1	0.1	0.1	0.343478	0.233333	0.1	0.750746	0.9	0.609091	0.107604	0.539336	0.347923
0.71065	0.388087	0.181896	0.22	0.1	0.1	0.1	0.1	0.1	0.1	0.1	0.1	0.1	0.1	0.1	0.1	0.1	0.766667	0.711667	0.226316	0.1	0.1	0.1	0.1	0.1	0.1	0.82189	0.559574	0.233333	0.9	0.1	0.1	0.1	0.343478	0.233333	0.1	0.750746	0.9	0.609091	0.107604	0.563507	0.284878
0.71065	0.388087	0.181896	0.22	0.1	0.1	0.1	0.1	0.1	0.1	0.1	0.1	0.1	0.1	0.1	0.1	0.1	0.766667	0.711667	0.226316	0.1	0.1	0.1	0.1	0.1	0.1	0.82189	0.593617	0.233333	0.9	0.1	0.1	0.1	0.343478	0.233333	0.1	0.750746	0.9	0.609091	0.107604	0.549289	0.274654
0.71065	0.388087	0.181896	0.22	0.1	0.1	0.1	0.1	0.1	0.1	0.1	0.1	0.1	0.1	0.1	0.1	0.1	0.766667	0.711667	0.226316	0.1	0.1	0.1	0.1	0.1	0.1	0.82189	0.62766	0.233333	0.9	0.1	0.1	0.1	0.343478	0.233333	0.1	0.750746	0.9	0.609091	0.107604	0.545972	0.261022
0.71065	0.388087	0.181896	0.22	0.1	0.1	0.1	0.1	0.1	0.1	0.1	0.1	0.1	0.1	0.1	0.1	0.1	0.766667	0.711667	0.226316	0.1	0.1	0.1	0.1	0.1	0.1	0.82189	0.661702	0.233333	0.9	0.1	0.1	0.1	0.343478	0.233333	0.1	0.750746	0.9	0.609091	0.107604	0.530806	0.263578
0.681047	0.383186	0.165759	0.334462	0.1	0.1	0.1	0.1	0.1	0.1	0.1	0.1	0.1	0.1	0.1	0.1	0.1	0.766667	0.711667	0.226316	0.1	0.1	0.1	0.1	0.1	0.1	0.82189	0.559574	0.233333	0.9	0.1	0.1	0.1	0.343478	0.233333	0.1	0.750746	0.9	0.609091	0.107604	0.219905	0.399894
0.681047	0.383186	0.165759	0.334462	0.1	0.1	0.1	0.1	0.1	0.1	0.1	0.1	0.1	0.1	0.1	0.1	0.1	0.766667	0.711667	0.226316	0.1	0.1	0.1	0.1	0.1	0.1	0.82189	0.593617	0.233333	0.9	0.1	0.1	0.1	0.343478	0.233333	0.1	0.750746	0.9	0.609091	0.107604	0.29763	0.416081
0.681047	0.383186	0.165759	0.334462	0.1	0.1	0.1	0.1	0.1	0.1	0.1	0.1	0.1	0.1	0.1	0.1	0.1	0.766667	0.711667	0.226316	0.1	0.1	0.1	0.1	0.1	0.1	0.82189	0.62766	0.233333	0.9	0.1	0.1	0.1	0.343478	0.233333	0.1	0.750746	0.9	0.609091	0.107604	0.391469	0.380298
0.681047	0.383186	0.165759	0.334462	0.1	0.1	0.1	0.1	0.1	0.1	0.1	0.1	0.1	0.1	0.1	0.1	0.1	0.766667	0.711667	0.226316	0.1	0.1	0.1	0.1	0.1	0.1	0.82189	0.661702	0.233333	0.9	0.1	0.1	0.1	0.343478	0.233333	0.1	0.750746	0.9	0.609091	0.107604	0.444076	0.247391
0.681047	0.383186	0.165759	0.334462	0.1	0.1	0.1	0.1	0.1	0.1	0.1	0.1	0.1	0.1	0.1	0.1	0.1	0.766667	0.711667	0.226316	0.1	0.1	0.1	0.1	0.1	0.1	0.82189	0.695745	0.233333	0.9	0.1	0.1	0.1	0.343478	0.233333	0.1	0.750746	0.9	0.609091	0.107604	0.441232	0.242279
0.644404	0.375834	0.177862	0.474154	0.1	0.1	0.1	0.1	0.1	0.1	0.1	0.1	0.1	0.1	0.1	0.1	0.1	0.766667	0.711667	0.226316	0.1	0.1	0.1	0.1	0.1	0.1	0.82189	0.525532	0.233333	0.9	0.1	0.1	0.1	0.343478	0.233333	0.1	0.750746	0.9	0.609091	0.107604	0.191469	0.635889
0.644404	0.375834	0.177862	0.474154	0.1	0.1	0.1	0.1	0.1	0.1	0.1	0.1	0.1	0.1	0.1	0.1	0.1	0.766667	0.711667	0.226316	0.1	0.1	0.1	0.1	0.1	0.1	0.82189	0.593617	0.233333	0.9	0.1	0.1	0.1	0.343478	0.233333	0.1	0.750746	0.9	0.609091	0.107604	0.187678	0.625666
0.644404	0.375834	0.177862	0.474154	0.1	0.1	0.1	0.1	0.1	0.1	0.1	0.1	0.1	0.1	0.1	0.1	0.1	0.766667	0.711667	0.226316	0.1	0.1	0.1	0.1	0.1	0.1	0.82189	0.661702	0.233333	0.9	0.1	0.1	0.1	0.343478	0.233333	0.1	0.750746	0.9	0.609091	0.107604	0.175355	0.559212
0.644404	0.375834	0.177862	0.474154	0.1	0.1	0.1	0.1	0.1	0.1	0.1	0.1	0.1	0.1	0.1	0.1	0.1	0.766667	0.711667	0.226316	0.1	0.1	0.1	0.1	0.1	0.1	0.82189	0.729787	0.233333	0.9	0.1	0.1	0.1	0.343478	0.233333	0.1	0.750746	0.9	0.609091	0.107604	0.159242	0.401597
0.644404	0.375834	0.177862	0.474154	0.1	0.1	0.1	0.1	0.1	0.1	0.1	0.1	0.1	0.1	0.1	0.1	0.1	0.766667	0.711667	0.226316	0.1	0.1	0.1	0.1	0.1	0.1	0.82189	0.76383	0.233333	0.9	0.1	0.1	0.1	0.343478	0.233333	0.1	0.750746	0.9	0.609091	0.107604	0.160664	0.404153
0.320217	0.791082	0.496571	0.592308	0.1	0.1	0.1	0.1	0.1	0.1	0.1	0.1	0.1	0.1	0.1	0.1	0.1	0.633333	0.7205	0.184211	0.1	0.1	0.864444	0.133333	0.1	0.580192	0.106299	0.76383	0.133333	0.9	0.1	0.1	0.1	0.1	0.1	0.1	0.377612	0.709524	0.245455	0.110245	0.237441	0.644409
0.284116	0.791082	0.496571	0.715385	0.1	0.1	0.1	0.1	0.1	0.1	0.1	0.1	0.1	0.1	0.1	0.1	0.1	0.633333	0.7205	0.184211	0.1	0.1	0.864444	0.133333	0.1	0.580192	0.106299	0.76383	0.133333	0.9	0.1	0.1	0.1	0.1	0.1	0.1	0.377612	0.709524	0.245455	0.110245	0.263507	0.695527
0.809386	0.249217	0.173828	0.198462	0.1	0.1	0.1	0.1	0.1	0.1	0.1	0.1	0.1	0.1	0.1	0.1	0.1	0.766667	0.716667	0.226316	0.1	0.1	0.1	0.1	0.1	0.1	0.824409	0.511915	0.233333	0.9	0.1	0.1	0.1	0.343478	0.233333	0.1	0.750746	0.9	0.609091	0.107604	0.367773	0.429712
0.784477	0.243771	0.165759	0.296923	0.1	0.1	0.1	0.1	0.1	0.1	0.1	0.1	0.1	0.1	0.1	0.1	0.1	0.766667	0.716667	0.226316	0.1	0.1	0.1	0.1	0.1	0.1	0.824409	0.559574	0.233333	0.9	0.1	0.1	0.1	0.343478	0.233333	0.1	0.750746	0.9	0.609091	0.107604	0.321327	0.383706
0.440253	0.57597	0.355371	0.690769	0.1	0.1	0.1	0.1	0.1	0.1	0.1	0.1	0.1	0.1	0.1	0.1	0.1	0.646667	0.766667	0.205263	0.1	0.1	0.26	0.100056	0.9	0.1	0.849606	0.1	0.1	0.1	0.1	0.1	0.1	0.1	0.1	0.1	0.750746	0.9	0.536364	0.107604	0.350379	0.291693
0.440253	0.57597	0.355371	0.690769	0.1	0.1	0.1	0.1	0.1	0.1	0.1	0.1	0.1	0.1	0.1	0.1	0.1	0.646667	0.766667	0.205263	0.1	0.1	0.26	0.100056	0.9	0.1	0.849606	0.695745	0.233333	0.9	0.1	0.1	0.1	0.1	0.1	0.1	0.750746	0.9	0.536364	0.107604	0.263507	0.422897
0.440253	0.57597	0.355371	0.690769	0.1	0.1	0.1	0.1	0.1	0.1	0.1	0.1	0.1	0.1	0.1	0.1	0.1	0.646667	0.766667	0.205263	0.1	0.1	0.26	0.100056	0.9	0.1	0.849606	0.76383	0.166667	0.9	0.1	0.1	0.1	0.1	0.1	0.1	0.750746	0.9	0.536364	0.107604	0.250237	0.38115
0.368718	0.788359	0.226273	0.274154	0.152683	0.358515	0.1	0.1	0.1	0.1	0.1	0.1	0.1	0.1	0.153333	0.293939	0.366667	0.7	0.646667	0.310526	0.1	0.1	0.793333	0.133333	0.1	0.9	0.1021	0.559574	0.144444	0.9	0.1	0.1	0.1	0.1	0.1	0.1	0.377612	0.9	0.172727	0.115608	0.218483	0.364963
0.368718	0.788359	0.226273	0.274154	0.152683	0.358515	0.1	0.1	0.1	0.1	0.1	0.1	0.1	0.1	0.153333	0.293939	0.366667	0.7	0.646667	0.310526	0.1	0.1	0.793333	0.133333	0.1	0.9	0.1021	0.62766	0.144444	0.9	0.1	0.1	0.1	0.1	0.1	0.1	0.377612	0.9	0.172727	0.115608	0.173128	0.459531
0.368718	0.788359	0.226273	0.274154	0.152683	0.358515	0.1	0.1	0.1	0.1	0.1	0.1	0.1	0.1	0.153333	0.293939	0.366667	0.7	0.646667	0.310526	0.1	0.1	0.793333	0.133333	0.1	0.9	0.1021	0.695745	0.144444	0.9	0.1	0.1	0.1	0.1	0.1	0.1	0.377612	0.9	0.172727	0.115608	0.144218	0.478275
0.368718	0.788359	0.226273	0.274154	0.152683	0.358515	0.1	0.1	0.1	0.1	0.1	0.1	0.1	0.1	0.153333	0.293939	0.366667	0.7	0.646667	0.310526	0.1	0.1	0.793333	0.133333	0.1	0.9	0.1021	0.76383	0.144444	0.9	0.1	0.1	0.1	0.1	0.1	0.1	0.377612	0.9	0.172727	0.115608	0.122749	0.543876
0.448816	0.760313	0.1	0.282769	0.1	0.1	0.1	0.1	0.1	0.1	0.1	0.1	0.1	0.1	0.206667	0.308485	0.1	0.7	0.5	0.689474	0.1	0.1	0.1	0.1	0.1	0.1	0.715223	0.797872	0.233333	0.9	0.1	0.1	0.1	0.1	0.1	0.1	0.601493	0.328571	0.318182	0.107604	0.197156	0.827583
0.389013	0.766031	0.100807	0.287692	0.689268	0.1	0.1	0.1	0.1	0.1	0.1	0.1	0.1	0.1	0.217333	0.310909	0.1	0.7	0.5	0.689474	0.1	0.1	0.1	0.1	0.1	0.1	0.715223	0.797872	0.233333	0.9	0.1	0.1	0.1	0.1	0.1	0.1	0.601493	0.328571	0.318182	0.107604	0.1	0.61033
0.651264	0.358135	0.198033	0.487692	0.1	0.1	0.1	0.1	0.1	0.1	0.1	0.1	0.1	0.1	0.1	0.1	0.1	0.566667	0.7205	0.184211	0.1	0.1	0.1	0.1	0.1	0.1	0.826341	0.559574	0.122222	0.1	0.1	0.1	0.1	0.1	0.1	0.1	0.377612	0.404762	0.463636	0.1004	0.25782	0.448456
0.651264	0.358135	0.198033	0.487692	0.1	0.1	0.1	0.1	0.1	0.1	0.1	0.1	0.1	0.1	0.1	0.1	0.1	0.566667	0.7205	0.184211	0.1	0.1	0.1	0.1	0.1	0.1	0.826341	0.62766	0.122222	0.1	0.1	0.1	0.1	0.1	0.1	0.1	0.377612	0.404762	0.463636	0.1004	0.247393	0.482535
0.651264	0.358135	0.198033	0.487692	0.1	0.1	0.1	0.1	0.1	0.1	0.1	0.1	0.1	0.1	0.1	0.1	0.1	0.566667	0.7205	0.184211	0.1	0.1	0.1	0.1	0.1	0.1	0.826341	0.695745	0.122222	0.1	0.1	0.1	0.1	0.1	0.1	0.1	0.377612	0.404762	0.463636	0.1004	0.235545	0.491054
0.651264	0.358135	0.198033	0.487692	0.1	0.1	0.1	0.1	0.1	0.1	0.1	0.1	0.1	0.1	0.1	0.1	0.1	0.566667	0.7205	0.184211	0.1	0.1	0.1	0.1	0.1	0.1	0.826341	0.76383	0.122222	0.1	0.1	0.1	0.1	0.1	0.1	0.1	0.377612	0.404762	0.463636	0.1004	0.185782	0.380298
0.681588	0.382641	0.165759	0.333846	0.1	0.1	0.1	0.1	0.1	0.1	0.1	0.1	0.1	0.1	0.1	0.1	0.1	0.833333	0.716667	0.226316	0.1	0.1	0.1	0.1	0.1	0.820288	0.1021	0.607234	0.106667	0.9	0.1	0.1	0.1	0.1	0.1	0.1	0.377612	0.9	0.172727	0.115608	0.352133	0.635889
0.623105	0.409871	0.375542	0.438462	0.1	0.1	0.1	0.1	0.1	0.1	0.1	0.1	0.1	0.1	0.206667	0.342424	0.1	0.7	0.7205	0.184211	0.9	0.1	0.544444	0.133333	0.366667	0.739616	0.1021	0.518723	0.122222	0.1	0.1	0.1	0.1	0.1	0.1	0.1	0.377612	0.404762	0.172727	0.107604	0.545498	0.15197
0.623105	0.409871	0.375542	0.438462	0.1	0.1	0.1	0.1	0.1	0.1	0.1	0.1	0.1	0.1	0.206667	0.342424	0.1	0.7	0.7205	0.184211	0.9	0.1	0.544444	0.133333	0.366667	0.739616	0.1021	0.539149	0.122222	0.1	0.1	0.1	0.1	0.1	0.1	0.1	0.377612	0.404762	0.172727	0.107604	0.46019	0.312141
0.623105	0.409871	0.375542	0.438462	0.1	0.1	0.1	0.1	0.1	0.1	0.1	0.1	0.1	0.1	0.206667	0.342424	0.1	0.7	0.7205	0.184211	0.9	0.1	0.544444	0.133333	0.366667	0.739616	0.1021	0.566383	0.122222	0.1	0.1	0.1	0.1	0.1	0.1	0.1	0.377612	0.404762	0.172727	0.107604	0.376303	0.440788
0.623105	0.409871	0.375542	0.438462	0.1	0.1	0.1	0.1	0.1	0.1	0.1	0.1	0.1	0.1	0.206667	0.342424	0.1	0.7	0.7205	0.184211	0.9	0.1	0.544444	0.133333	0.366667	0.739616	0.1021	0.593617	0.122222	0.1	0.1	0.1	0.1	0.1	0.1	0.1	0.377612	0.404762	0.172727	0.107604	0.350237	0.473163
0.59787	0.603199	0.274685	0.1	0.109756	0.1	0.1	0.1	0.1	0.1	0.1	0.1	0.1	0.1	0.206667	0.172727	0.233333	0.7	0.626667	0.289474	0.9	0.9	0.402222	0.133333	0.1	0.1	0.779055	0.1	0.1	0.1	0.1	0.1	0.1	0.1	0.1	0.1	0.377612	0.404762	0.318182	0.107604	0.390047	0.600106
0.549079	0.676719	0.274685	0.1	0.109756	0.1	0.1	0.1	0.1	0.1	0.1	0.1	0.1	0.1	0.206667	0.148485	0.34	0.7	0.626667	0.289474	0.9	0.9	0.402222	0.133333	0.1	0.1	0.779055	0.1	0.1	0.1	0.1	0.1	0.1	0.1	0.1	0.1	0.377612	0.404762	0.318182	0.107604	0.347393	0.710863
0.558141	0.608645	0.274685	0.223077	0.109756	0.1	0.1	0.1	0.1	0.1	0.1	0.1	0.1	0.1	0.206667	0.148485	0.286667	0.7	0.626667	0.289474	0.9	0.9	0.402222	0.133333	0.1	0.1	0.779055	0.1	0.1	0.1	0.1	0.1	0.1	0.1	0.1	0.1	0.377612	0.404762	0.318182	0.107604	0.274408	0.682748
0.516408	0.671273	0.278719	0.223077	0.109756	0.1	0.1	0.1	0.1	0.1	0.1	0.1	0.1	0.1	0.206667	0.1	0.393333	0.7	0.626667	0.289474	0.9	0.9	0.402222	0.133333	0.1	0.1	0.779055	0.1	0.1	0.1	0.1	0.1	0.1	0.1	0.1	0.1	0.377612	0.404762	0.318182	0.107604	0.267299	0.692119
0.759747	0.246494	0.153656	0.284615	0.392683	0.1	0.1	0.1	0.1	0.1	0.1	0.1	0.1	0.1	0.1	0.1	0.1	0.9	0.883333	0.184211	0.1	0.1	0.1	0.1	0.1	0.739616	0.1021	0.573191	0.106667	0.5	0.1	0.1	0.1	0.1	0.1	0.1	0.750746	0.9	0.172727	0.107604	0.280569	0.295101
0.759747	0.246494	0.153656	0.284615	0.392683	0.1	0.1	0.1	0.1	0.1	0.1	0.1	0.1	0.1	0.1	0.1	0.1	0.9	0.883333	0.184211	0.1	0.1	0.1	0.1	0.1	0.739616	0.1021	0.654894	0.106667	0.5	0.1	0.1	0.1	0.1	0.1	0.1	0.750746	0.9	0.172727	0.107604	0.315166	0.397338
0.75704	0.246494	0.21417	0.284615	0.392683	0.1	0.1	0.1	0.1	0.1	0.1	0.1	0.1	0.1	0.1	0.1	0.1	0.9	0.883333	0.184211	0.1	0.1	0.1	0.1	0.1	0.739616	0.1021	0.614043	0.106667	0.5	0.1	0.1	0.1	0.1	0.1	0.1	0.750746	0.9	0.172727	0.107604	0.4109	0.576251
0.805415	0.164806	0.133485	0.407692	0.1	0.1	0.1	0.1	0.1	0.1	0.1	0.1	0.1	0.1	0.206667	0.342424	0.1	0.7	0.85	0.184211	0.1	0.1	0.544444	0.133333	0.366667	0.739616	0.1021	0.1	0.1	0.1	0.1	0.1	0.1	0.1	0.1	0.1	0.192537	0.404762	0.172727	0.107604	0.128578	0.253355
0.801805	0.164806	0.21417	0.407692	0.1	0.1	0.1	0.1	0.1	0.1	0.1	0.1	0.1	0.1	0.206667	0.342424	0.1	0.7	0.85	0.184211	0.1	0.1	0.544444	0.133333	0.366667	0.739616	0.1021	0.1	0.1	0.1	0.1	0.1	0.1	0.1	0.1	0.1	0.192537	0.404762	0.172727	0.107604	0.229336	0.206496
0.798195	0.164806	0.294856	0.407692	0.1	0.1	0.1	0.1	0.1	0.1	0.1	0.1	0.1	0.1	0.206667	0.342424	0.1	0.7	0.85	0.184211	0.1	0.1	0.544444	0.133333	0.366667	0.739616	0.1021	0.1	0.1	0.1	0.1	0.1	0.1	0.1	0.1	0.1	0.192537	0.404762	0.172727	0.107604	0.270332	0.204792
0.794585	0.164806	0.375542	0.407692	0.1	0.1	0.1	0.1	0.1	0.1	0.1	0.1	0.1	0.1	0.206667	0.342424	0.1	0.7	0.85	0.184211	0.1	0.1	0.544444	0.133333	0.366667	0.739616	0.1021	0.1	0.1	0.1	0.1	0.1	0.1	0.1	0.1	0.1	0.192537	0.404762	0.172727	0.107604	0.329242	0.187753
0.498971	0.712117	0.215784	0.192308	0.117561	0.106987	0.1	0.1	0.1	0.1	0.1	0.1	0.1	0.1	0.281333	0.245455	0.1	0.766667	0.6	0.478947	0.1	0.1	0.9	0.133333	0.1	0.1	0.765617	0.1	0.1	0.1	0.1	0.1	0.1	0.1	0.1	0.1	0.243284	0.17619	0.245455	0.115608	0.187678	0.9
0.498971	0.712117	0.215784	0.192308	0.117561	0.106987	0.1	0.1	0.1	0.1	0.1	0.1	0.1	0.1	0.281333	0.245455	0.1	0.766667	0.6	0.478947	0.1	0.1	0.9	0.133333	0.1	0.292077	0.160892	0.1	0.1	0.1	0.1	0.1	0.1	0.1	0.1	0.1	0.243284	0.17619	0.245455	0.115608	0.272986	0.373482
0.498971	0.712117	0.215784	0.192308	0.117561	0.106987	0.1	0.1	0.1	0.1	0.1	0.1	0.1	0.1	0.281333	0.245455	0.1	0.766667	0.6	0.478947	0.1	0.1	0.9	0.133333	0.1	0.484154	0.144094	0.1	0.1	0.1	0.1	0.1	0.1	0.1	0.1	0.1	0.243284	0.17619	0.245455	0.115608	0.419905	0.144302
0.498971	0.712117	0.215784	0.192308	0.117561	0.106987	0.1	0.1	0.1	0.1	0.1	0.1	0.1	0.1	0.281333	0.245455	0.1	0.766667	0.6	0.478947	0.1	0.1	0.9	0.133333	0.1	0.67623	0.127297	0.1	0.1	0.1	0.1	0.1	0.1	0.1	0.1	0.1	0.243284	0.17619	0.245455	0.115608	0.538389	0.128967
0.498971	0.712117	0.215784	0.192308	0.117561	0.106987	0.1	0.1	0.1	0.1	0.1	0.1	0.1	0.1	0.281333	0.245455	0.1	0.766667	0.6	0.478947	0.1	0.1	0.9	0.133333	0.1	0.868307	0.110499	0.1	0.1	0.1	0.1	0.1	0.1	0.1	0.1	0.1	0.243284	0.17619	0.245455	0.115608	0.623697	0.115335
0.668953	0.461334	0.323096	0.175077	0.1	0.1	0.1	0.1	0.1	0.1	0.1	0.1	0.1	0.1	0.1	0.1	0.1	0.766667	0.683333	0.184211	0.1	0.1	0.1	0.1	0.1	0.609004	0.105459	0.675319	0.122222	0.1	0.1	0.1	0.1	0.1	0.1	0.1	0.377612	0.404762	0.230909	0.107604	0.363697	0.658892
0.442112	0.66855	0.117347	0.319077	0.706829	0.1	0.1	0.1	0.1	0.1	0.1	0.1	0.1	0.1	0.185333	0.318182	0.1	0.833333	0.1	0.394737	0.1	0.1	0.821778	0.133333	0.9	0.1	0.513648	0.1	0.1	0.1	0.1	0.1	0.1	0.1	0.1	0.1	0.377612	0.404762	0.201818	0.102241	0.185308	0.540895
0.442112	0.66855	0.117347	0.319077	0.706829	0.1	0.1	0.1	0.1	0.1	0.1	0.1	0.1	0.1	0.185333	0.318182	0.1	0.833333	0.1	0.394737	0.1	0.1	0.821778	0.133333	0.9	0.196038	0.154173	0.1	0.1	0.1	0.1	0.1	0.1	0.1	0.1	0.1	0.377612	0.404762	0.201818	0.102241	0.284834	0.373227
0.442112	0.66855	0.117347	0.319077	0.706829	0.1	0.1	0.1	0.1	0.1	0.1	0.1	0.1	0.1	0.185333	0.318182	0.1	0.833333	0.1	0.394737	0.1	0.1	0.821778	0.133333	0.9	0.388115	0.140735	0.1	0.1	0.1	0.1	0.1	0.1	0.1	0.1	0.1	0.377612	0.404762	0.201818	0.102241	0.313744	0.329606
0.442112	0.66855	0.117347	0.319077	0.706829	0.1	0.1	0.1	0.1	0.1	0.1	0.1	0.1	0.1	0.185333	0.318182	0.1	0.833333	0.1	0.394737	0.1	0.1	0.821778	0.133333	0.9	0.580192	0.127297	0.1	0.1	0.1	0.1	0.1	0.1	0.1	0.1	0.1	0.377612	0.404762	0.201818	0.102241	0.44455	0.251906
0.202888	0.9	0.9	0.684615	0.1	0.1	0.1	0.1	0.1	0.1	0.1	0.1	0.1	0.1	0.1	0.1	0.1	0.766667	0.7205	0.331579	0.1	0.1	0.1	0.1	0.1	0.1	0.826341	0.831915	0.233333	0.9	0.1	0.1	0.1	0.1	0.1	0.1	0.750746	0.9	0.9	0.104962	0.419905	0.533653
0.691697	0.314568	0.21417	0.444615	0.1	0.1	0.1	0.1	0.1	0.1	0.1	0.1	0.1	0.1	0.206667	0.342424	0.1	0.7	0.7205	0.184211	0.9	0.1	0.544444	0.133333	0.1	0.739616	0.1021	0.695745	0.166667	0.1	0.1	0.1	0.1	0.1	0.1	0.1	0.377612	0.404762	0.172727	0.107604	0.222749	0.738126
0.790632	0.31484	0.113313	0.104923	0.156585	0.1	0.1	0.1	0.1	0.1	0.1	0.1	0.1	0.1	0.190667	0.112121	0.1	0.433333	0.7205	0.184211	0.9	0.1	0.508889	0.133333	0.366667	0.1	0.826341	0.505106	0.122222	0.1	0.1	0.1	0.1	0.1	0.1	0.1	0.377612	0.404762	0.201818	0.1004	0.364929	0.312141
0.790632	0.31484	0.113313	0.104923	0.156585	0.1	0.1	0.1	0.1	0.1	0.1	0.1	0.1	0.1	0.190667	0.112121	0.1	0.433333	0.7205	0.184211	0.9	0.1	0.508889	0.133333	0.366667	0.67623	0.10378	0.505106	0.122222	0.1	0.1	0.1	0.1	0.1	0.1	0.1	0.377612	0.404762	0.201818	0.1004	0.440284	0.295101
0.727852	0.20565	0.1	0.586154	0.1	0.1	0.1	0.1	0.1	0.1	0.1	0.1	0.1	0.1	0.1	0.1	0.1	0.1	0.683333	0.184211	0.1	0.1	0.686667	0.108333	0.1	0.739616	0.1021	0.593617	0.233333	0.1	0.1	0.1	0.1	0.1	0.1	0.1	0.192537	0.328571	0.172727	0.107604	0.155545	0.387966
0.694874	0.216542	0.131064	0.610769	0.1	0.1	0.1	0.1	0.1	0.1	0.86	0.1	0.1	0.1	0.1	0.1	0.1	0.1	0.683333	0.184211	0.1	0.1	0.686667	0.108333	0.1	0.739616	0.1021	0.593617	0.233333	0.1	0.1	0.1	0.1	0.1	0.1	0.1	0.192537	0.328571	0.172727	0.107604	0.204028	0.343663
0.233574	0.818312	0.415885	0.838462	0.1	0.1	0.1	0.1	0.1	0.1	0.1	0.1	0.1	0.1	0.1	0.1	0.1	0.833333	0.7205	0.478947	0.1	0.1	0.793333	0.133333	0.1	0.820288	0.114698	0.831915	0.166667	0.9	0.1	0.1	0.1	0.1	0.1	0.1	0.383582	0.404762	0.289091	0.107604	0.342654	0.410969
0.681047	0.383186	0.165759	0.334462	0.1	0.1	0.1	0.1	0.1	0.1	0.1	0.1	0.1	0.1	0.1	0.1	0.1	0.766667	0.711667	0.226316	0.1	0.1	0.1	0.1	0.1	0.1	0.82189	0.559574	0.233333	0.9	0.1	0.1	0.1	0.343478	0.233333	0.1	0.750746	0.9	0.609091	0.107604	0.224645	0.399042
0.681047	0.383186	0.165759	0.334462	0.1	0.1	0.1	0.1	0.1	0.1	0.1	0.1	0.1	0.1	0.1	0.1	0.1	0.766667	0.711667	0.226316	0.1	0.1	0.1	0.1	0.1	0.1	0.82189	0.593617	0.233333	0.9	0.1	0.1	0.1	0.343478	0.233333	0.1	0.750746	0.9	0.609091	0.107604	0.293365	0.410969
0.681047	0.383186	0.165759	0.334462	0.1	0.1	0.1	0.1	0.1	0.1	0.1	0.1	0.1	0.1	0.1	0.1	0.1	0.766667	0.711667	0.226316	0.1	0.1	0.1	0.1	0.1	0.1	0.82189	0.62766	0.233333	0.9	0.1	0.1	0.1	0.343478	0.233333	0.1	0.750746	0.9	0.609091	0.107604	0.390047	0.373482
0.681047	0.383186	0.165759	0.334462	0.1	0.1	0.1	0.1	0.1	0.1	0.1	0.1	0.1	0.1	0.1	0.1	0.1	0.766667	0.711667	0.226316	0.1	0.1	0.1	0.1	0.1	0.1	0.82189	0.661702	0.233333	0.9	0.1	0.1	0.1	0.343478	0.233333	0.1	0.750746	0.9	0.609091	0.107604	0.44455	0.252503
0.681047	0.383186	0.165759	0.334462	0.1	0.1	0.1	0.1	0.1	0.1	0.1	0.1	0.1	0.1	0.1	0.1	0.1	0.766667	0.711667	0.226316	0.1	0.1	0.1	0.1	0.1	0.1	0.82189	0.695745	0.233333	0.9	0.1	0.1	0.1	0.343478	0.233333	0.1	0.750746	0.9	0.609091	0.107604	0.436493	0.241427
0.565162	0.416133	0.415885	0.616923	0.1	0.1	0.1	0.1	0.1	0.1	0.1	0.1	0.1	0.1	0.1	0.1	0.1	0.833333	0.7205	0.184211	0.1	0.1	0.793333	0.133333	0.1	0.580192	0.106299	0.695745	0.133333	0.1	0.1	0.1	0.1	0.1	0.1	0.1	0.377612	0.709524	0.245455	0.110245	0.3109	0.477423
0.681047	0.383186	0.165759	0.334462	0.1	0.1	0.1	0.1	0.1	0.1	0.1	0.1	0.1	0.1	0.1	0.1	0.1	0.766667	0.71	0.226316	0.1	0.1	0.1	0.1	0.1	0.1	0.82105	0.62766	0.233333	0.9	0.1	0.1	0.1	0.343478	0.233333	0.1	0.750746	0.9	0.609091	0.107604	0.387678	0.37689
0.227527	0.812866	0.419919	0.858154	0.1	0.1	0.1	0.132389	0.1	0.1	0.1	0.1	0.1	0.1	0.121333	0.172727	0.1	0.833333	0.7205	0.478947	0.1	0.1	0.793333	0.133333	0.1	0.820288	0.114698	0.831915	0.166667	0.9	0.1	0.1	0.1	0.1	0.1	0.1	0.383582	0.404762	0.289091	0.107604	0.327488	0.439936
0.61444	0.420762	0.173828	0.42	0.27561	0.1	0.1	0.1	0.1	0.1	0.1	0.1	0.1	0.1	0.1	0.1	0.1	0.833333	0.7205	0.192632	0.1	0.1	0.544444	0.133333	0.1	0.760744	0.1021	0.62766	0.104444	0.5	0.1	0.1	0.1	0.1	0.1	0.1	0.377612	0.404762	0.172727	0.110245	0.261137	0.405857
0.61444	0.420762	0.173828	0.42	0.27561	0.1	0.1	0.1	0.1	0.1	0.1	0.1	0.1	0.1	0.1	0.1	0.1	0.833333	0.7205	0.192632	0.1	0.1	0.544444	0.133333	0.1	0.760744	0.1021	0.695745	0.104444	0.5	0.1	0.1	0.1	0.1	0.1	0.1	0.377612	0.404762	0.172727	0.110245	0.235071	0.465495
0.705776	0.303676	0.18593	0.426154	0.101951	0.1	0.1	0.1	0.1	0.1	0.1	0.1	0.1	0.1	0.1	0.1	0.1	0.833333	0.7205	0.192632	0.1	0.1	0.544444	0.133333	0.1	0.760744	0.1021	0.62766	0.104444	0.5	0.1	0.1	0.1	0.1	0.1	0.1	0.377612	0.404762	0.172727	0.110245	0.250711	0.397338
0.705776	0.303676	0.18593	0.426154	0.101951	0.1	0.1	0.1	0.1	0.1	0.1	0.1	0.1	0.1	0.1	0.1	0.1	0.833333	0.7205	0.192632	0.1	0.1	0.544444	0.133333	0.1	0.760744	0.1021	0.695745	0.104444	0.5	0.1	0.1	0.1	0.1	0.1	0.1	0.377612	0.404762	0.172727	0.110245	0.324645	0.542173
0.41769	0.627706	0.335199	0.653846	0.1	0.1	0.1	0.1	0.1	0.1	0.1	0.1	0.1	0.1	0.1	0.1	0.1	0.833333	0.7205	0.478947	0.1	0.1	0.793333	0.133333	0.1	0.820288	0.114698	0.62766	0.122222	0.9	0.1	0.1	0.1	0.1	0.1	0.1	0.383582	0.404762	0.318182	0.107604	0.338389	0.439936
0.41769	0.627706	0.335199	0.653846	0.1	0.1	0.1	0.1	0.1	0.1	0.1	0.1	0.1	0.1	0.1	0.1	0.1	0.833333	0.7205	0.478947	0.1	0.1	0.793333	0.133333	0.1	0.820288	0.114698	0.695745	0.122222	0.9	0.1	0.1	0.1	0.1	0.1	0.1	0.383582	0.404762	0.318182	0.107604	0.268246	0.456976
0.41769	0.627706	0.335199	0.653846	0.1	0.1	0.1	0.1	0.1	0.1	0.1	0.1	0.1	0.1	0.1	0.1	0.1	0.833333	0.7205	0.478947	0.1	0.1	0.793333	0.133333	0.1	0.820288	0.114698	0.76383	0.122222	0.9	0.1	0.1	0.1	0.1	0.1	0.1	0.383582	0.404762	0.318182	0.107604	0.256872	0.474015
0.41769	0.627706	0.335199	0.653846	0.1	0.1	0.1	0.1	0.1	0.1	0.1	0.1	0.1	0.1	0.1	0.1	0.1	0.833333	0.7205	0.478947	0.1	0.1	0.793333	0.133333	0.1	0.820288	0.114698	0.831915	0.122222	0.9	0.1	0.1	0.1	0.1	0.1	0.1	0.383582	0.404762	0.318182	0.107604	0.247867	0.482535
0.384422	0.776106	0.105245	0.277231	0.697073	0.1	0.1	0.1	0.1	0.1	0.1	0.1	0.1	0.1	0.185333	0.269697	0.313333	0.7	0.516667	0.689474	0.1	0.1	0.1	0.1	0.1	0.1	0.723622	0.831915	0.233333	0.9	0.1	0.1	0.1	0.1	0.1	0.1	0.452239	0.328571	0.318182	0.107604	0.192417	0.827583
0.247292	0.849626	0.827383	0.658154	0.1	0.1	0.1	0.1	0.1	0.1	0.1	0.1	0.1	0.1	0.1	0.1	0.1	0.9	0.433333	0.310526	0.1	0.1	0.1	0.1	0.1	0.1	0.681627	0.9	0.366667	0.9	0.1	0.1	0.1	0.1	0.1	0.1	0.750746	0.861905	0.754545	0.104962	0.38673	0.554952
0.405957	0.627706	0.193999	0.715385	0.1	0.1	0.1	0.1	0.1	0.1	0.1	0.1	0.1	0.1	0.1	0.1	0.1	0.833333	0.7205	0.121053	0.1	0.1	0.1	0.1	0.1	0.1	0.826341	0.831915	0.133333	0.9	0.1	0.1	0.1	0.1	0.1	0.1	0.377612	0.328571	0.172727	0.102001	0.240284	0.168158
0.401444	0.627706	0.294856	0.715385	0.1	0.1	0.1	0.1	0.1	0.1	0.1	0.1	0.1	0.1	0.1	0.1	0.1	0.833333	0.7205	0.121053	0.1	0.1	0.1	0.1	0.1	0.1	0.826341	0.831915	0.133333	0.9	0.1	0.1	0.1	0.1	0.1	0.1	0.377612	0.328571	0.172727	0.102001	0.25782	0.332588
0.392419	0.627706	0.496571	0.715385	0.1	0.1	0.1	0.1	0.1	0.1	0.1	0.1	0.1	0.1	0.1	0.1	0.1	0.833333	0.7205	0.121053	0.1	0.1	0.1	0.1	0.1	0.1	0.826341	0.831915	0.133333	0.9	0.1	0.1	0.1	0.1	0.1	0.1	0.377612	0.328571	0.172727	0.102001	0.274408	0.585623
0.388809	0.627706	0.577257	0.715385	0.1	0.1	0.1	0.1	0.1	0.1	0.1	0.1	0.1	0.1	0.1	0.1	0.1	0.833333	0.7205	0.121053	0.1	0.1	0.1	0.1	0.1	0.1	0.826341	0.831915	0.133333	0.9	0.1	0.1	0.1	0.1	0.1	0.1	0.377612	0.328571	0.172727	0.102001	0.292417	0.406709
0.383394	0.627706	0.698285	0.715385	0.1	0.1	0.1	0.1	0.1	0.1	0.1	0.1	0.1	0.1	0.1	0.1	0.1	0.833333	0.7205	0.121053	0.1	0.1	0.1	0.1	0.1	0.1	0.826341	0.831915	0.133333	0.9	0.1	0.1	0.1	0.1	0.1	0.1	0.377612	0.328571	0.172727	0.102001	0.392417	0.227796
0.374368	0.627706	0.496571	0.776923	0.1	0.1	0.1	0.1	0.1	0.1	0.1	0.1	0.1	0.1	0.1	0.1	0.1	0.833333	0.7205	0.121053	0.1	0.1	0.1	0.1	0.1	0.1	0.826341	0.831915	0.133333	0.9	0.1	0.1	0.1	0.1	0.1	0.1	0.377612	0.328571	0.172727	0.102001	0.323223	0.386262
0.293141	0.627706	0.698285	0.715385	0.1	0.536681	0.1	0.1	0.1	0.1	0.1	0.1	0.1	0.1	0.1	0.1	0.1	0.833333	0.7205	0.121053	0.1	0.1	0.1	0.1	0.1	0.1	0.826341	0.831915	0.133333	0.9	0.1	0.1	0.1	0.1	0.1	0.1	0.377612	0.328571	0.172727	0.102001	0.317536	0.641001
0.269675	0.627706	0.819314	0.776923	0.1	0.536681	0.1	0.1	0.1	0.1	0.1	0.1	0.1	0.1	0.1	0.1	0.1	0.833333	0.7205	0.121053	0.1	0.1	0.1	0.1	0.1	0.1	0.826341	0.831915	0.133333	0.9	0.1	0.1	0.1	0.1	0.1	0.1	0.377612	0.328571	0.172727	0.102001	0.43981	0.32918
0.266065	0.627706	0.496571	0.838462	0.1	0.536681	0.1	0.1	0.1	0.1	0.1	0.1	0.1	0.1	0.1	0.1	0.1	0.833333	0.7205	0.121053	0.1	0.1	0.1	0.1	0.1	0.1	0.826341	0.831915	0.133333	0.9	0.1	0.1	0.1	0.1	0.1	0.1	0.377612	0.328571	0.172727	0.102001	0.348815	0.356443
0.248014	0.627706	0.496571	0.9	0.1	0.536681	0.1	0.1	0.1	0.1	0.1	0.1	0.1	0.1	0.1	0.1	0.1	0.833333	0.7205	0.121053	0.1	0.1	0.1	0.1	0.1	0.1	0.826341	0.831915	0.133333	0.9	0.1	0.1	0.1	0.1	0.1	0.1	0.377612	0.328571	0.172727	0.102001	0.41327	0.325772
0.242599	0.627706	0.6176	0.9	0.1	0.536681	0.1	0.1	0.1	0.1	0.1	0.1	0.1	0.1	0.1	0.1	0.1	0.833333	0.7205	0.121053	0.1	0.1	0.1	0.1	0.1	0.1	0.826341	0.831915	0.133333	0.9	0.1	0.1	0.1	0.1	0.1	0.1	0.377612	0.328571	0.172727	0.102001	0.415166	0.271246
0.220939	0.9	0.9	0.623077	0.1	0.1	0.1	0.1	0.1	0.1	0.1	0.1	0.1	0.1	0.1	0.1	0.1	0.9	0.7205	0.310526	0.1	0.1	0.1	0.1	0.1	0.1	0.826341	0.9	0.366667	0.9	0.1	0.1	0.1	0.1	0.1	0.1	0.750746	0.9	0.754545	0.103602	0.398578	0.546432
0.248014	0.848264	0.819314	0.66	0.1	0.1	0.1	0.1	0.1	0.1	0.1	0.1	0.1	0.1	0.1	0.1	0.1	0.9	0.7205	0.310526	0.1	0.1	0.1	0.1	0.1	0.1	0.826341	0.9	0.366667	0.9	0.1	0.1	0.1	0.1	0.1	0.1	0.750746	0.861905	0.754545	0.103602	0.38673	0.554952
0.192058	0.848264	0.819314	0.66	0.1	0.370742	0.1	0.1	0.1	0.1	0.1	0.1	0.1	0.1	0.1	0.1	0.1	0.9	0.7205	0.310526	0.1	0.1	0.1	0.1	0.1	0.1	0.826341	0.9	0.366667	0.9	0.1	0.1	0.1	0.1	0.1	0.1	0.750746	0.861905	0.754545	0.103602	0.392417	0.484239
0.157762	0.848264	0.819314	0.66	0.1	0.536681	0.1	0.1	0.1	0.1	0.1	0.1	0.1	0.1	0.1	0.1	0.1	0.9	0.7205	0.310526	0.1	0.1	0.1	0.1	0.1	0.1	0.826341	0.9	0.366667	0.9	0.1	0.1	0.1	0.1	0.1	0.1	0.750746	0.861905	0.754545	0.103602	0.397156	0.415229
0.137906	0.848264	0.819314	0.66	0.1	0.632751	0.1	0.1	0.1	0.1	0.1	0.1	0.1	0.1	0.1	0.1	0.1	0.9	0.7205	0.310526	0.1	0.1	0.1	0.1	0.1	0.1	0.826341	0.9	0.366667	0.9	0.1	0.1	0.1	0.1	0.1	0.1	0.750746	0.861905	0.754545	0.103602	0.406635	0.393078
0.1	0.848264	0.819314	0.66	0.1	0.816157	0.1	0.1	0.1	0.1	0.1	0.1	0.1	0.1	0.1	0.1	0.1	0.9	0.7205	0.310526	0.1	0.1	0.1	0.1	0.1	0.1	0.826341	0.9	0.366667	0.9	0.1	0.1	0.1	0.1	0.1	0.1	0.750746	0.861905	0.754545	0.103602	0.341232	0.274654
0.814982	0.226072	0.169793	0.196	0.215122	0.1	0.1	0.1	0.1	0.1	0.1	0.1	0.1	0.1	0.1	0.1	0.1	0.833333	0.7205	0.184211	0.1	0.1	0.1	0.1	0.1	0.609004	0.105459	0.58	0.106667	0.1	0.1	0.1	0.1	0.1	0.1	0.1	0.377612	0.442857	0.230909	0.104962	0.368246	0.439936
0.825451	0.246494	0.117347	0.158462	0.1	0.1	0.1	0.1	0.1	0.1	0.1	0.1	0.1	0.1	0.1	0.1	0.1	0.766667	0.8	0.163158	0.1	0.1	0.1	0.1	0.1	0.67623	0.1021	0.491489	0.233333	0.1	0.1	0.1	0.1	0.1	0.1	0.1	0.377612	0.404762	0.172727	0.107604	0.276303	0.279766
0.826173	0.244316	0.153656	0.155385	0.1	0.1	0.1	0.1	0.1	0.1	0.1	0.1	0.1	0.1	0.1	0.1	0.1	0.766667	0.8	0.163158	0.1	0.1	0.1	0.1	0.1	0.67623	0.1021	0.491489	0.233333	0.1	0.1	0.1	0.1	0.1	0.1	0.1	0.377612	0.404762	0.172727	0.107604	0.288626	0.326624
0.823827	0.243771	0.21417	0.155385	0.1	0.1	0.1	0.1	0.1	0.1	0.1	0.1	0.1	0.1	0.1	0.1	0.1	0.766667	0.8	0.163158	0.1	0.1	0.1	0.1	0.1	0.67623	0.1021	0.491489	0.233333	0.1	0.1	0.1	0.1	0.1	0.1	0.1	0.377612	0.404762	0.172727	0.107604	0.301896	0.358147
0.825451	0.246494	0.117347	0.158462	0.1	0.1	0.1	0.1	0.1	0.1	0.1	0.1	0.1	0.1	0.1	0.1	0.1	0.766667	0.8	0.163158	0.1	0.1	0.1	0.1	0.1	0.67623	0.1021	0.511915	0.233333	0.1	0.1	0.1	0.1	0.1	0.1	0.1	0.377612	0.404762	0.172727	0.107604	0.278673	0.323216
0.826173	0.244316	0.153656	0.155385	0.1	0.1	0.1	0.1	0.1	0.1	0.1	0.1	0.1	0.1	0.1	0.1	0.1	0.766667	0.8	0.163158	0.1	0.1	0.1	0.1	0.1	0.67623	0.1021	0.511915	0.233333	0.1	0.1	0.1	0.1	0.1	0.1	0.1	0.377612	0.404762	0.172727	0.107604	0.312796	0.357295
0.823827	0.243771	0.21417	0.155385	0.1	0.1	0.1	0.1	0.1	0.1	0.1	0.1	0.1	0.1	0.1	0.1	0.1	0.766667	0.8	0.163158	0.1	0.1	0.1	0.1	0.1	0.67623	0.1021	0.511915	0.233333	0.1	0.1	0.1	0.1	0.1	0.1	0.1	0.377612	0.404762	0.172727	0.107604	0.321801	0.508094
0.825451	0.246494	0.117347	0.158462	0.1	0.1	0.1	0.1	0.1	0.1	0.1	0.1	0.1	0.1	0.1	0.1	0.1	0.766667	0.8	0.163158	0.1	0.1	0.1	0.1	0.1	0.67623	0.1021	0.511915	0.233333	0.1	0.1	0.1	0.1	0.1	0.1	0.1	0.377612	0.404762	0.172727	0.107604	0.285308	0.357295
0.826173	0.244316	0.153656	0.155385	0.1	0.1	0.1	0.1	0.1	0.1	0.1	0.1	0.1	0.1	0.1	0.1	0.1	0.766667	0.8	0.163158	0.1	0.1	0.1	0.1	0.1	0.67623	0.1021	0.511915	0.233333	0.1	0.1	0.1	0.1	0.1	0.1	0.1	0.377612	0.404762	0.172727	0.107604	0.322749	0.407561
0.823827	0.243771	0.21417	0.155385	0.1	0.1	0.1	0.1	0.1	0.1	0.1	0.1	0.1	0.1	0.1	0.1	0.1	0.766667	0.8	0.163158	0.1	0.1	0.1	0.1	0.1	0.67623	0.1021	0.511915	0.233333	0.1	0.1	0.1	0.1	0.1	0.1	0.1	0.377612	0.404762	0.172727	0.107604	0.407583	0.471459
0.810078	0.291695	0.169793	0.1	0.1	0.1	0.1	0.1	0.1	0.1	0.1	0.1	0.1	0.1	0.148	0.274545	0.1	0.766667	0.716667	0.226316	0.1	0.1	0.526667	0.133333	0.9	0.705042	0.106299	0.508511	0.122222	0.1	0.1	0.1	0.1	0.1	0.1	0.1	0.377612	0.404762	0.245455	0.115608	0.453081	0.456976
0.754798	0.299047	0.169793	0.271692	0.1	0.1	0.1	0.1	0.1	0.1	0.1	0.1	0.1	0.1	0.165067	0.296364	0.1	0.766667	0.716667	0.226316	0.1	0.1	0.58	0.133333	0.9	0.705042	0.106299	0.566383	0.122222	0.1	0.1	0.1	0.1	0.1	0.1	0.1	0.377612	0.404762	0.245455	0.115608	0.334597	0.559212
0.733574	0.273724	0.254513	0.284615	0.353659	0.1	0.1	0.1	0.1	0.1	0.26	0.1	0.1	0.277778	0.1	0.1	0.1	0.7	0.8	0.268421	0.1	0.1	0.1	0.1	0.1	0.1	0.866404	0.287234	0.233333	0.1	0.1	0.1	0.1	0.1	0.1	0.1	0.377612	0.404762	0.754545	0.104962	0.727962	0.224388
0.733574	0.273724	0.254513	0.284615	0.353659	0.1	0.1	0.1	0.1	0.1	0.26	0.1	0.1	0.277778	0.1	0.1	0.1	0.7	0.8	0.268421	0.1	0.1	0.1	0.1	0.1	0.1	0.866404	0.355319	0.233333	0.1	0.1	0.1	0.1	0.1	0.1	0.1	0.377612	0.404762	0.754545	0.104962	0.735071	0.202236
0.733574	0.273724	0.254513	0.284615	0.353659	0.1	0.1	0.1	0.1	0.1	0.26	0.1	0.1	0.277778	0.1	0.1	0.1	0.7	0.8	0.268421	0.1	0.1	0.1	0.1	0.1	0.1	0.866404	0.423404	0.233333	0.1	0.1	0.1	0.1	0.1	0.1	0.1	0.377612	0.404762	0.754545	0.104962	0.737441	0.209052
0.733574	0.273724	0.254513	0.284615	0.353659	0.1	0.1	0.1	0.1	0.1	0.26	0.1	0.1	0.277778	0.1	0.1	0.1	0.7	0.8	0.268421	0.1	0.1	0.1	0.1	0.1	0.1	0.866404	0.491489	0.233333	0.1	0.1	0.1	0.1	0.1	0.1	0.1	0.377612	0.404762	0.754545	0.104962	0.623697	0.169862
0.733574	0.273724	0.254513	0.284615	0.353659	0.1	0.1	0.1	0.1	0.1	0.26	0.1	0.1	0.277778	0.1	0.1	0.1	0.7	0.8	0.268421	0.1	0.1	0.1	0.1	0.1	0.1	0.866404	0.559574	0.233333	0.1	0.1	0.1	0.1	0.1	0.1	0.1	0.377612	0.404762	0.754545	0.104962	0.410427	0.308733
0.482671	0.491559	0.496571	0.715385	0.1	0.1	0.1	0.1	0.1	0.1	0.1	0.1	0.1	0.1	0.1	0.1	0.1	0.7	0.683333	0.184211	0.1	0.1	0.1	0.1	0.1	0.1	0.807612	0.784255	0.233333	0.9	0.1	0.1	0.1	0.1	0.1	0.1	0.750746	0.9	0.463636	0.103602	0.281469	0.587327
0.482671	0.491559	0.496571	0.715385	0.1	0.1	0.1	0.1	0.1	0.1	0.1	0.1	0.1	0.1	0.1	0.1	0.1	0.7	0.683333	0.184211	0.1	0.1	0.1	0.1	0.1	0.1	0.807612	0.784255	0.233333	0.7	0.1	0.1	0.1	0.1	0.1	0.1	0.750746	0.9	0.463636	0.103602	0.369621	0.402449
0.482671	0.491559	0.496571	0.715385	0.1	0.1	0.1	0.1	0.1	0.1	0.1	0.1	0.1	0.1	0.1	0.1	0.1	0.7	0.683333	0.184211	0.1	0.1	0.1	0.1	0.1	0.1	0.807612	0.784255	0.233333	0.1	0.1	0.1	0.1	0.1	0.1	0.1	0.750746	0.9	0.463636	0.103602	0.38763	0.280618
0.820036	0.187679	0.202068	0.198462	0.217073	0.1	0.1	0.1	0.1	0.1	0.34	0.1	0.1	0.722222	0.1	0.1	0.1	0.833333	0.866667	0.150526	0.1	0.1	0.1	0.1	0.1	0.1	0.9	0.58	0.144444	0.1	0.1	0.1	0.1	0.1	0.1	0.1	0.377612	0.404762	0.347273	0.110005	0.351659	0.241427
0.820036	0.187679	0.202068	0.198462	0.217073	0.1	0.1	0.1	0.1	0.1	0.34	0.1	0.1	0.722222	0.1	0.1	0.1	0.833333	0.866667	0.150526	0.1	0.1	0.1	0.1	0.1	0.1	0.9	0.58	0.144444	0.1	0.1	0.1	0.1	0.1	0.1	0.1	0.377612	0.404762	0.347273	0.110005	0.404739	0.440788
0.820036	0.187679	0.202068	0.198462	0.217073	0.1	0.1	0.1	0.1	0.1	0.34	0.1	0.1	0.722222	0.1	0.1	0.1	0.833333	0.866667	0.150526	0.1	0.1	0.1	0.1	0.1	0.1	0.9	0.586809	0.144444	0.1	0.1	0.1	0.1	0.1	0.1	0.1	0.377612	0.404762	0.347273	0.110005	0.45545	0.335144
0.687906	0.360858	0.286788	0.235385	0.236585	0.1	0.1	0.148583	0.1	0.1	0.1	0.1	0.1	0.766667	0.1	0.1	0.1	0.833333	0.766667	0.184211	0.1	0.9	0.1	0.1	0.1	0.551381	0.107139	0.525532	0.166667	0.1	0.1	0.1	0.1	0.1	0.1	0.1	0.9	0.709524	0.26	0.10064	0.542654	0.221832
0.816968	0.249217	0.177862	0.159692	0.139024	0.1	0.1	0.1	0.1	0.1	0.1	0.1	0.1	0.1	0.1	0.1	0.1	0.233333	0.866667	0.121053	0.1	0.1	0.1	0.1	0.1	0.1	0.9	0.533702	0.233333	0.1	0.1	0.1	0.1	0.1	0.1	0.1	0.377612	0.404762	0.172727	0.107604	0.467299	0.431416
0.784116	0.273724	0.21417	0.223077	0.1	0.1	0.1	0.1	0.1	0.1	0.1	0.1	0.1	0.1	0.1	0.1	0.1	0.833333	0.816667	0.226316	0.1	0.9	0.722222	0.116667	0.633333	0.1	0.874803	0.545957	0.233333	0.1	0.1	0.1	0.1	0.1	0.1	0.1	0.750746	0.709524	0.609091	0.104962	0.275355	0.468903
0.784116	0.273724	0.21417	0.223077	0.1	0.1	0.1	0.1	0.1	0.1	0.1	0.1	0.1	0.1	0.1	0.1	0.1	0.833333	0.816667	0.226316	0.1	0.9	0.722222	0.116667	0.633333	0.1	0.874803	0.559574	0.233333	0.1	0.1	0.1	0.1	0.1	0.1	0.1	0.750746	0.709524	0.609091	0.104962	0.285308	0.537913
0.784116	0.273724	0.21417	0.223077	0.1	0.1	0.1	0.1	0.1	0.1	0.1	0.1	0.1	0.1	0.1	0.1	0.1	0.833333	0.816667	0.226316	0.1	0.9	0.722222	0.116667	0.633333	0.1	0.874803	0.573191	0.233333	0.1	0.1	0.1	0.1	0.1	0.1	0.1	0.750746	0.709524	0.609091	0.104962	0.380569	0.575399
0.784116	0.273724	0.21417	0.223077	0.1	0.1	0.1	0.1	0.1	0.1	0.1	0.1	0.1	0.1	0.1	0.1	0.1	0.833333	0.816667	0.226316	0.1	0.9	0.722222	0.116667	0.633333	0.1	0.874803	0.593617	0.233333	0.1	0.1	0.1	0.1	0.1	0.1	0.1	0.750746	0.709524	0.609091	0.104962	0.448815	0.294249
0.725451	0.328182	0.234342	0.296923	0.1	0.1	0.1	0.1	0.1	0.1	0.1	0.1	0.1	0.1	0.1	0.1	0.1	0.406667	0.65	0.268421	0.1	0.9	0.1	0.1	0.1	0.1	0.790814	0.491489	0.233333	0.9	0.1	0.1	0.1	0.1	0.1	0.1	0.601493	0.9	0.609091	0.107604	0.419905	0.238871
0.725451	0.328182	0.234342	0.296923	0.1	0.1	0.1	0.1	0.1	0.1	0.1	0.1	0.1	0.1	0.1	0.1	0.1	0.406667	0.65	0.268421	0.1	0.9	0.1	0.1	0.1	0.1	0.790814	0.525532	0.233333	0.9	0.1	0.1	0.1	0.1	0.1	0.1	0.601493	0.9	0.609091	0.107604	0.43436	0.605218
0.725451	0.328182	0.234342	0.296923	0.1	0.1	0.1	0.1	0.1	0.1	0.1	0.1	0.1	0.1	0.1	0.1	0.1	0.406667	0.65	0.268421	0.1	0.9	0.1	0.1	0.1	0.1	0.790814	0.559574	0.233333	0.9	0.1	0.1	0.1	0.1	0.1	0.1	0.601493	0.9	0.609091	0.107604	0.315735	0.299361
0.713718	0.382641	0.173828	0.223077	0.1	0.1	0.1	0.1	0.1	0.1	0.1	0.1	0.1	0.1	0.1	0.1	0.1	0.833333	0.716667	0.226316	0.1	0.1	0.1	0.1	0.1	0.820288	0.1021	0.525532	0.111111	0.9	0.1	0.1	0.1	0.1	0.1	0.1	0.302985	0.709524	0.172727	0.101201	0.564929	0.492758
0.713718	0.382641	0.173828	0.223077	0.1	0.1	0.1	0.1	0.1	0.1	0.1	0.1	0.1	0.1	0.1	0.1	0.1	0.833333	0.716667	0.226316	0.1	0.1	0.1	0.1	0.1	0.820288	0.1021	0.525532	0.111111	0.9	0.1	0.1	0.1	0.1	0.1	0.1	0.302985	0.709524	0.172727	0.115608	0.467299	0.449308
0.713718	0.382641	0.173828	0.223077	0.1	0.1	0.1	0.1	0.1	0.1	0.1	0.1	0.1	0.1	0.1	0.1	0.1	0.833333	0.716667	0.226316	0.1	0.1	0.1	0.1	0.1	0.820288	0.1021	0.525532	0.111111	0.9	0.1	0.1	0.1	0.1	0.1	0.1	0.302985	0.709524	0.172727	0.25968	0.443602	0.447604
0.831047	0.219265	0.173828	0.161538	0.197561	0.1	0.1	0.1	0.1	0.1	0.1	0.1	0.1	0.1	0.1	0.1	0.1	0.833333	0.85	0.184211	0.1	0.1	0.508889	0.166667	0.1	0.609004	0.105459	0.559574	0.106667	0.9	0.1	0.1	0.1	0.1	0.1	0.1	0.377612	0.404762	0.230909	0.107604	0.381043	0.391885
0.799278	0.260109	0.15769	0.167692	0.1	0.1	0.1	0.1	0.366667	0.1	0.5	0.1	0.1	0.1	0.1	0.1	0.1	0.833333	0.683333	0.310526	0.1	0.633333	0.544444	0.133333	0.1	0.820288	0.106299	0.525532	0.122222	0.1	0.1	0.1	0.1	0.1	0.1	0.1	0.377612	0.404762	0.172727	0.106003	0.471564	0.311289
0.799278	0.260109	0.15769	0.167692	0.1	0.1	0.1	0.1	0.366667	0.1	0.5	0.1	0.1	0.1	0.1	0.1	0.1	0.833333	0.683333	0.310526	0.1	0.633333	0.544444	0.133333	0.1	0.820288	0.106299	0.525532	0.166667	0.1	0.1	0.1	0.1	0.1	0.1	0.1	0.377612	0.404762	0.172727	0.106003	0.454976	0.363259
0.799278	0.260109	0.15769	0.167692	0.1	0.1	0.1	0.1	0.366667	0.1	0.5	0.1	0.1	0.1	0.1	0.1	0.1	0.833333	0.683333	0.310526	0.1	0.633333	0.544444	0.133333	0.1	0.820288	0.106299	0.525532	0.233333	0.1	0.1	0.1	0.1	0.1	0.1	0.1	0.377612	0.404762	0.172727	0.106003	0.436019	0.3377
0.799278	0.260109	0.15769	0.167692	0.1	0.1	0.1	0.1	0.366667	0.1	0.5	0.1	0.1	0.1	0.1	0.1	0.1	0.833333	0.683333	0.310526	0.1	0.633333	0.544444	0.133333	0.1	0.820288	0.106299	0.525532	0.5	0.1	0.1	0.1	0.1	0.1	0.1	0.1	0.377612	0.404762	0.172727	0.106003	0.403791	0.371778
0.799278	0.260109	0.15769	0.167692	0.1	0.1	0.1	0.1	0.366667	0.1	0.5	0.1	0.1	0.1	0.1	0.1	0.1	0.833333	0.683333	0.310526	0.1	0.633333	0.544444	0.133333	0.1	0.820288	0.106299	0.525532	0.7	0.1	0.1	0.1	0.1	0.1	0.1	0.1	0.377612	0.404762	0.172727	0.106003	0.463507	0.338552
0.799278	0.260109	0.15769	0.167692	0.1	0.1	0.1	0.1	0.366667	0.1	0.5	0.1	0.1	0.1	0.1	0.1	0.1	0.833333	0.683333	0.310526	0.1	0.633333	0.544444	0.133333	0.1	0.820288	0.106299	0.525532	0.9	0.1	0.1	0.1	0.1	0.1	0.1	0.1	0.377612	0.404762	0.172727	0.106003	0.389573	0.370927
0.286823	0.831926	0.476399	0.616923	0.1	0.1	0.1	0.1	0.1	0.1	0.1	0.1	0.1	0.1	0.1	0.1	0.1	0.7	0.516667	0.478947	0.1	0.9	0.473333	0.100056	0.1	0.1	0.723622	0.1	0.1	0.1	0.1	0.1	0.1	0.1	0.1	0.1	0.228358	0.17619	0.463636	0.13962	0.366825	0.447604
0.3713	0.831926	0.484468	0.327692	0.1	0.1	0.1	0.1	0.1	0.1	0.1	0.1	0.1	0.1	0.1	0.1	0.1	0.7	0.516667	0.478947	0.1	0.9	0.473333	0.100056	0.1	0.1	0.723622	0.1	0.1	0.1	0.1	0.1	0.1	0.1	0.1	0.1	0.228358	0.17619	0.463636	0.13962	0.287204	0.424601
0.286462	0.831926	0.484468	0.616923	0.1	0.1	0.1	0.1	0.1	0.1	0.1	0.1	0.1	0.1	0.1	0.1	0.1	0.7	0.516667	0.478947	0.1	0.9	0.473333	0.100056	0.1	0.1	0.723622	0.78766	0.366667	0.9	0.1	0.1	0.1	0.1	0.1	0.1	0.228358	0.17619	0.463636	0.13962	0.266351	0.617998
0.3713	0.831926	0.484468	0.327692	0.1	0.1	0.1	0.1	0.1	0.1	0.1	0.1	0.1	0.1	0.1	0.1	0.1	0.7	0.516667	0.478947	0.1	0.9	0.473333	0.100056	0.1	0.1	0.723622	0.78766	0.366667	0.9	0.1	0.1	0.1	0.1	0.1	0.1	0.228358	0.17619	0.463636	0.13962	0.25545	0.548136
0.286462	0.831926	0.484468	0.616923	0.1	0.1	0.1	0.1	0.1	0.1	0.1	0.1	0.1	0.1	0.1	0.1	0.1	0.7	0.516667	0.478947	0.1	0.9	0.473333	0.100056	0.1	0.772269	0.118898	0.1	0.1	0.1	0.1	0.1	0.1	0.1	0.1	0.1	0.228358	0.17619	0.463636	0.13962	0.686256	0.143791
0.3713	0.831926	0.484468	0.327692	0.1	0.1	0.1	0.1	0.1	0.1	0.1	0.1	0.1	0.1	0.1	0.1	0.1	0.7	0.516667	0.478947	0.1	0.9	0.473333	0.100056	0.1	0.772269	0.118898	0.1	0.1	0.1	0.1	0.1	0.1	0.1	0.1	0.1	0.228358	0.17619	0.463636	0.13962	0.640284	0.174973
0.3713	0.831926	0.484468	0.327692	0.1	0.1	0.1	0.1	0.1	0.1	0.1	0.1	0.1	0.1	0.1	0.1	0.1	0.7	0.516667	0.478947	0.1	0.9	0.473333	0.100056	0.1	0.772269	0.118898	0.661702	0.233333	0.3	0.1	0.1	0.1	0.1	0.1	0.1	0.228358	0.17619	0.463636	0.13962	0.322749	0.509798
0.833773	0.225528	0.137519	0.168308	0.119317	0.1	0.1	0.1	0.1	0.1	0.1	0.1	0.1	0.1	0.1	0.1	0.1	0.833333	0.766667	0.184211	0.1	0.9	0.1	0.1	0.1	0.1	0.849606	0.491489	0.233333	0.9	0.1	0.1	0.1	0.1	0.1	0.1	0.750746	0.9	0.463636	0.107604	0.181517	0.415655
0.833773	0.225528	0.137519	0.168308	0.119317	0.1	0.1	0.1	0.1	0.1	0.1	0.1	0.1	0.1	0.1	0.1	0.1	0.833333	0.766667	0.184211	0.1	0.9	0.1	0.1	0.1	0.1	0.849606	0.508511	0.233333	0.9	0.1	0.1	0.1	0.1	0.1	0.1	0.750746	0.9	0.463636	0.107604	0.237038	0.583663
0.833773	0.225528	0.137519	0.168308	0.119317	0.1	0.1	0.1	0.1	0.1	0.1	0.1	0.1	0.1	0.1	0.1	0.1	0.833333	0.766667	0.184211	0.1	0.9	0.1	0.1	0.1	0.1	0.849606	0.525532	0.233333	0.9	0.1	0.1	0.1	0.1	0.1	0.1	0.750746	0.9	0.463636	0.107604	0.237687	0.471544
0.833773	0.225528	0.137519	0.168308	0.119317	0.1	0.1	0.1	0.1	0.1	0.1	0.1	0.1	0.1	0.1	0.1	0.1	0.833333	0.766667	0.184211	0.1	0.9	0.1	0.1	0.1	0.1	0.849606	0.542553	0.233333	0.9	0.1	0.1	0.1	0.1	0.1	0.1	0.750746	0.9	0.463636	0.107604	0.319038	0.297231
0.833773	0.225528	0.137519	0.168308	0.119317	0.1	0.1	0.1	0.1	0.1	0.1	0.1	0.1	0.1	0.1	0.1	0.1	0.833333	0.766667	0.184211	0.1	0.9	0.1	0.1	0.1	0.1	0.849606	0.559574	0.233333	0.9	0.1	0.1	0.1	0.1	0.1	0.1	0.750746	0.9	0.463636	0.107604	0.391166	0.309329
0.833773	0.225528	0.137519	0.168308	0.119317	0.1	0.1	0.1	0.1	0.1	0.1	0.1	0.1	0.1	0.1	0.1	0.1	0.833333	0.766667	0.184211	0.1	0.9	0.1	0.1	0.1	0.1	0.849606	0.508511	0.366667	0.9	0.1	0.1	0.1	0.1	0.1	0.1	0.750746	0.9	0.463636	0.107604	0.228474	0.672524
0.833773	0.225528	0.137519	0.168308	0.119317	0.1	0.1	0.1	0.1	0.1	0.1	0.1	0.1	0.1	0.1	0.1	0.1	0.833333	0.766667	0.184211	0.1	0.9	0.1	0.1	0.1	0.1	0.849606	0.508511	0.633333	0.9	0.1	0.1	0.1	0.1	0.1	0.1	0.750746	0.9	0.463636	0.107604	0.262237	0.681044
0.833773	0.225528	0.137519	0.168308	0.119317	0.1	0.1	0.1	0.1	0.1	0.1	0.1	0.1	0.1	0.1	0.1	0.1	0.833333	0.766667	0.184211	0.1	0.9	0.1	0.1	0.1	0.1	0.849606	0.508511	0.9	0.9	0.1	0.1	0.1	0.1	0.1	0.1	0.750746	0.9	0.463636	0.107604	0.215318	0.715974
0.833773	0.225528	0.137519	0.168308	0.119317	0.1	0.1	0.1	0.1	0.1	0.1	0.1	0.1	0.1	0.1	0.1	0.1	0.833333	0.766667	0.184211	0.1	0.9	0.1	0.1	0.1	0.1	0.849606	0.508511	0.633333	0.3	0.1	0.1	0.1	0.1	0.1	0.1	0.750746	0.9	0.463636	0.107604	0.31363	0.544473
0.796913	0.245133	0.11533	0.163385	0.402439	0.1	0.1	0.1	0.1	0.1	0.1	0.1	0.1	0.1	0.153333	0.124242	0.1	0.833333	0.863333	0.163158	0.9	0.1	0.508889	0.133333	0.366667	0.196038	0.112598	0.559574	0.106667	0.1	0.1	0.1	0.1	0.1	0.1	0.1	0.377612	0.404762	0.427273	0.115608	0.305687	0.299361
0.796913	0.245133	0.11533	0.163385	0.402439	0.1	0.1	0.1	0.1	0.1	0.1	0.1	0.1	0.1	0.153333	0.124242	0.1	0.833333	0.863333	0.163158	0.9	0.1	0.508889	0.133333	0.366667	0.772269	0.1	0.559574	0.106667	0.1	0.1	0.1	0.1	0.1	0.1	0.1	0.377612	0.404762	0.136364	0.115608	0.349763	0.297657
0.792798	0.215997	0.173828	0.291385	0.220976	0.1	0.1	0.1	0.1	0.1	0.1	0.1	0.1	0.1	0.142667	0.221212	0.1	0.833333	0.626667	0.289474	0.1	0.1	0.615556	0.133333	0.1	0.829892	0.108819	0.559574	0.122222	0.1	0.1	0.1	0.1	0.1	0.1	0.1	0.377612	0.328571	0.201818	0.1	0.26872	0.415229
0.792798	0.215997	0.173828	0.291385	0.220976	0.1	0.1	0.1	0.1	0.1	0.1	0.1	0.1	0.1	0.142667	0.221212	0.1	0.833333	0.626667	0.289474	0.1	0.1	0.615556	0.133333	0.1	0.829892	0.108819	0.58	0.122222	0.1	0.1	0.1	0.1	0.1	0.1	0.1	0.377612	0.328571	0.201818	0.1	0.292891	0.591587
0.792798	0.215997	0.173828	0.291385	0.220976	0.1	0.1	0.1	0.1	0.1	0.1	0.1	0.1	0.1	0.142667	0.221212	0.1	0.833333	0.626667	0.289474	0.1	0.1	0.615556	0.133333	0.1	0.829892	0.108819	0.607234	0.122222	0.1	0.1	0.1	0.1	0.1	0.1	0.1	0.377612	0.328571	0.201818	0.1	0.377251	0.39819
0.792798	0.215997	0.173828	0.291385	0.220976	0.1	0.1	0.1	0.1	0.1	0.1	0.1	0.1	0.1	0.142667	0.221212	0.1	0.833333	0.626667	0.289474	0.1	0.1	0.615556	0.133333	0.1	0.829892	0.108819	0.661702	0.122222	0.1	0.1	0.1	0.1	0.1	0.1	0.1	0.377612	0.328571	0.201818	0.1	0.476303	0.191161
0.708213	0.283254	0.153656	0.469231	0.1	0.1	0.1	0.1	0.1	0.1	0.1	0.1	0.1	0.1	0.142667	0.124242	0.1	0.766667	0.79	0.184211	0.1	0.9	0.473333	0.100056	0.1	0.1	0.861365	0.559574	0.233333	0.9	0.1	0.1	0.1	0.1	0.1	0.1	0.750746	0.9	0.463636	0.107604	0.243744	0.278062
0.708213	0.283254	0.153656	0.469231	0.1	0.1	0.1	0.1	0.1	0.1	0.1	0.1	0.1	0.1	0.142667	0.124242	0.1	0.766667	0.79	0.184211	0.1	0.9	0.473333	0.100056	0.1	0.1	0.861365	0.62766	0.233333	0.9	0.1	0.1	0.1	0.1	0.1	0.1	0.750746	0.9	0.463636	0.107604	0.218246	0.34196
0.708213	0.283254	0.153656	0.469231	0.1	0.1	0.1	0.1	0.1	0.1	0.1	0.1	0.1	0.1	0.142667	0.124242	0.1	0.766667	0.79	0.184211	0.1	0.9	0.473333	0.100056	0.1	0.1	0.861365	0.695745	0.233333	0.9	0.1	0.1	0.1	0.1	0.1	0.1	0.750746	0.9	0.463636	0.107604	0.276019	0.354739
0.708213	0.283254	0.153656	0.469231	0.1	0.1	0.1	0.1	0.1	0.1	0.1	0.1	0.1	0.1	0.142667	0.124242	0.1	0.766667	0.79	0.184211	0.1	0.9	0.473333	0.100056	0.1	0.1	0.861365	0.76383	0.233333	0.9	0.1	0.1	0.1	0.1	0.1	0.1	0.750746	0.9	0.463636	0.107604	0.282607	0.209904
0.76509	0.360585	0.137519	0.100246	0.109756	0.1	0.1	0.1	0.1	0.1	0.1	0.1	0.1	0.1	0.1	0.1	0.1	0.7	0.6	0.226316	0.1	0.1	0.1	0.1	0.1	0.70024	0.106299	0.491489	0.233333	0.1	0.1	0.1	0.1	0.1	0.1	0.1	0.153731	0.17619	0.1	0.107604	0.448341	0.406709
0.731769	0.359769	0.141553	0.215077	0.109756	0.1	0.1	0.1	0.1	0.1	0.1	0.1	0.1	0.1	0.1	0.1	0.1	0.7	0.6	0.226316	0.1	0.1	0.1	0.1	0.1	0.70024	0.106299	0.525532	0.233333	0.1	0.1	0.1	0.1	0.1	0.1	0.1	0.153731	0.17619	0.1	0.107604	0.413744	0.468903
0.641877	0.355956	0.173828	0.296308	0.718537	0.1	0.1	0.1	0.9	0.1	0.1	0.1	0.1	0.1	0.1	0.1	0.1	0.7	0.6	0.310526	0.1	0.9	0.1	0.1	0.1	0.1	0.765617	0.9	0.133333	0.9	0.1	0.1	0.1	0.1	0.1	0.1	0.377612	0.404762	0.754545	0.131616	0.286256	0.346219
0.641877	0.355956	0.173828	0.296308	0.718537	0.1	0.1	0.1	0.9	0.1	0.1	0.1	0.1	0.1	0.1	0.1	0.1	0.7	0.6	0.310526	0.1	0.9	0.1	0.1	0.1	0.1	0.765617	0.695745	0.133333	0.1	0.1	0.1	0.1	0.1	0.1	0.1	0.377612	0.404762	0.754545	0.131616	0.302844	0.278062
0.641877	0.355956	0.173828	0.296308	0.718537	0.1	0.1	0.1	0.9	0.1	0.1	0.1	0.1	0.1	0.1	0.1	0.1	0.7	0.6	0.310526	0.1	0.9	0.1	0.1	0.1	0.1	0.765617	0.831915	0.133333	0.3	0.1	0.1	0.1	0.1	0.1	0.1	0.377612	0.404762	0.754545	0.131616	0.24218	0.295101
